# Supplementary material
Source: publisher figshare collection journal article supplement (https://tandf.figshare.com/articles/dataset/_/6865415)
Supplement: Supplementary file 1 [file 1]

## Sheet: Phylotype only
Unique ID	Coral species	Phylo ID gene	ITS2 Phylo	Phylotype TT Score (Rk)	Colony Number	Sampling Location	Realm (Spalding 2007)	Province (Spalding 2007)	Ecoregion (Spalding 2007)	Depth (m)	Min Depth (m)	Max Depth (m)	Lat	Long	Conditions	Database	Phylotype GenBank #	Notes	Phylotype ID Methods	Citation	Phylotype Survey Date	Survey begin mo	Survey begin year	Survey end mo	Survey end year	Symbiodinium in propagules	Mode of larval development	Sexual system
517	Seriatopora hystrix	ITS2	C3-ff	2.63408	NA	Yonge Reef, GBR	Central Indo-Pacific	Northeast Australian Shelf	Torres Strait Northern Great Barrier Reef	27	27	27	-14.6166	145.636	Normal Conditions	SymbioGBR	HM185740		DGGE of ITS2 & sequencing	Bongaerts 2010 PLoS1 Genetic divergence across habitats in the widespread coral Seriatopora hystrix		2	2008	2	2008	Yes	brooder	hermaphrodite
2451	Acropora hyacinthus	ITS2	C101a	4.39013	NA	Racha	Western Indo-Pacific	Andaman	Andaman Sea Coral Coast	2-5	2	5	7.6101	98.3706	Normal Cond	Geosymbio	N_A		DGGE of ITS2 & sequencing	LaJeunesse 2010 JBiogeograph Long-standing environmental conditions isolation and host–symbiont specificity	2007-02-01	2	2007	2	2007	No	spawner	hermaphrodite
2656	Platygyra lamellina	ITS2	C101a	4.39013	NA	Racha	Western Indo-Pacific	Andaman	Andaman Sea Coral Coast	2-5	2	5	7.6101	98.3706	Normal Cond	Geosymbio	N_A		DGGE of ITS2 & sequencing	LaJeunesse 2010 JBiogeograph Long-standing environmental conditions isolation and host–symbiont specificity	2007-02-01	2	2007	2	2007	No	spawner	hermaphrodite
9100	Montipora caliculata	ITS2	C110	4.39013	NA	Similan Islands	Western Indo-Pacific	Andaman	Andaman Sea Coral Coast	2-12	2	12	8.6525	97.6408	Normal Cond	Geosymbio			DGGE of ITS2 & sequencing	LaJeunesse 2010 JBiogeograph Long-standing environmental conditions isolation and host–symbiont specificity	2007-02-01	2	2007	2	2007	Yes	spawner	hermaphrodite
8242	Montipora peltiformis	ITS2	C110	4.39013	NA	Zanzibar	Western Indo-Pacific	Western Indian Ocean	East African Coral Coast		1	7	-6.15262	39.136	Normal Cond	Direct from publication			DGGE of ITS2 & sequencing	Chauka 2012 WIndOceaJMarSci Diversity of Symbiodinium in Tanzania		4	2008	4	2008	Yes	spawner	hermaphrodite
15427	Pocillopora damicornis	ITS2	C1d-t	4.39013	NA	NA	NA	NA	NA	NA	NA	NA	NA	NA	Normal Cond	Original pub		Held in capticivity at aquarium for up to 18 years	DGGE of ITS2 & sequencing	Smith 2009 JPhycol symbiodinium (dinophyta) diversity and stability in aquarium	<10-2008	NA	NA	NA	NA	Yes	brooder	hermaphrodite
9246.1	Pocillopora meandrina	ITS2	C1d-t	4.39013	NA	Similan Islands	Western Indo-Pacific	Andaman	Andaman Sea Coral Coast	2-12	2	12	8.6525	97.6408	Normal Cond	Geosymbio			DGGE of ITS2 & sequencing	LaJeunesse 2010 JBiogeograph Long-standing environmental conditions isolation and host–symbiont specificity	2007-02-01	2	2007	2	2007	Yes	spawner	hermaphrodite
9184	Pocillopora verrucosa	ITS2	C1d-t	4.39013	NA	Similan Islands	Western Indo-Pacific	Andaman	Andaman Sea Coral Coast	2-12	2	12	8.6525	97.6408	Normal Cond	Geosymbio			DGGE of ITS2 & sequencing	LaJeunesse 2010 JBiogeograph Long-standing environmental conditions isolation and host–symbiont specificity	2007-02-01	2	2007	2	2007	Yes	spawner	hermaphrodite
15469	Montipora aequituberculata	ITS2	C26a	4.39013	NA	NA	NA	NA	NA	NA	NA	NA	NA	NA	Normal Cond	Original pub		Held in capticivity at aquarium for up to 18 years	DGGE of ITS2 & sequencing	Smith 2009 JPhycol symbiodinium (dinophyta) diversity and stability in aquarium	<10-2008	NA	NA	NA	NA	Yes	spawner	hermaphrodite
X1	Montipora capricornis	ITS2	C26a	4.39013	NA	NA	NA	NA	NA	NA	NA	NA	NA	NA	Normal Cond	Original pub		Held in capticivity at aquarium for up to 18 years	DGGE of ITS2 & sequencing	Smith 2009 JPhycol symbiodinium (dinophyta) diversity and stability in aquarium	<10-2008	NA	NA	NA	NA	Yes	spawner	hermaphrodite
9749	Montipora hispida	ITS2	C26a	4.39013	NA	Rib Reef GBR	Central Indo-Pacific	Northeast Australian Shelf	Central and Southern Great Barrier Reef	1-8	1	8	-18.4781	146.871	Normal Cond	Riddle 2011			DGGE of ITS2 & sequencing	LaJeunesse 2004 MEPS Closely related Symbiodinium spp differ in relative dominance	May (2003)	5	2003	5	2003	Yes	spawner	hermaphrodite
9753	Montipora monasteriata	ITS2	C26a	4.39013	NA	Feather Reef GBR	Central Indo-Pacific	Northeast Australian Shelf	Central and Southern Great Barrier Reef	1–8	1	8	-18	146	Normal Cond	Riddle 2011			DGGE of ITS2 & sequencing	LaJeunesse 2004 MEPS Closely related Symbiodinium spp differ in relative dominance	May (2003)	5	2003	5	2003	Yes	spawner	hermaphrodite
X2	Montipora turtlensis	ITS2	C26a	4.39013	NA	Rib Reef GBR	Central Indo-Pacific	Northeast Australian Shelf	Central and Southern Great Barrier Reef	1-8	1	8	-18.4781	146.871	Normal Cond	Riddle 2011			DGGE of ITS2 & sequencing	LaJeunesse 2004 MEPS Closely related Symbiodinium spp differ in relative dominance	May (2003)	5	2003	5	2003	Yes	spawner	hermaphrodite
X3	Goniopora fruticosa	ITS2	D4-5	4.39013	NA	Similan Islands	Western Indo-Pacific	Andaman	Andaman Sea Coral Coast	2-12	2	12	8.6525	97.6408	Normal Cond	Geosymbio			DGGE of ITS2 & sequencing	LaJeunesse 2010 JBiogeograph Long-standing environmental conditions isolation and host–symbiont specificity	2007-02-01	2	2007	2	2007	No	spawner	gonochore
512	Seriatopora hystrix	ITS2	C120a	5.26815	NA	Day Reef, GBR	Central Indo-Pacific	Northeast Australian Shelf	Torres Strait Northern Great Barrier Reef	2	2	2	-14.4746	145.539	Normal Conditions	SymbioGBR	HM185738		DGGE of ITS2 & sequencing	Bongaerts 2010 PLoS1 Genetic divergence across habitats in the widespread coral Seriatopora hystrix		2	2008	2	2008	Yes	brooder	hermaphrodite
675	Seriatopora hystrix	ITS2	C1m-aa	5.26815	NA	Day Reef, GBR	Central Indo-Pacific	Northeast Australian Shelf	Torres Strait Northern Great Barrier Reef	2	2	2	-14.4746	145.539	Normal Conditions	SymbioGBR	HM185741		DGGE of ITS2 & sequencing	Bongaerts 2010 PLoS1 Genetic divergence across habitats in the widespread coral Seriatopora hystrix		2	2008	2	2008	Yes	brooder	hermaphrodite
X4	Porites monticulosa	ITS2	C161	7.90223	NA	Lizard Island, GBR	Central Indo-Pacific	Northeast Australian Shelf	Torres Strait Northern Great Barrier Reef	27	27	27	-14.6166	145.636	Normal Conditions				DGGE of ITS2 & sequencing	Tonk 2014 JPhycol Symbiodinium diversity in reef invertebrates		10	2007	9	2008	Yes	spawner	gonochore
X5	Paragoniastrea australensis	ITS2	C1hh	7.90223	NA	Dunsborough	Temperate Australasia	Southwest Australian Shelf	Leeuwin	15	15	15	-33.6141	115.116	Normal Cond				DGGE of ITS2 & sequencing	Silverstein 2011 MEPS Novel algal symbiont diversity in reef corals of Western Australia	2005-06-01	6	2005	6	2005	No	spawner	hermaphrodite
X6	Coscinaraea mcneilli	ITS2	C7d	7.90223	NA	Dunsborough	Temperate Australasia	Southwest Australian Shelf	Leeuwin	15	15	15	-33.6141	115.116	Normal Cond				DGGE of ITS2 & sequencing	Silverstein 2011 MEPS Novel algal symbiont diversity in reef corals of Western Australia	2005-06-01	6	2005	6	2005	No	spawner	gonochore
X7	Turbinaria reniformis	ITS2	C7d	7.90223	NA	Dunsborough	Temperate Australasia	Southwest Australian Shelf	Leeuwin	15	15	15	-33.6141	115.116	Normal Cond				DGGE of ITS2 & sequencing	Silverstein 2011 MEPS Novel algal symbiont diversity in reef corals of Western Australia	2005-06-01	6	2005	6	2005	No	spawner	gonochore
275	Seriatopora hystrix	ITS2	C120	7.90223	NA	Yonge Reef, GBR	Central Indo-Pacific	Northeast Australian Shelf	Torres Strait Northern Great Barrier Reef	2	2	2	-14.6166	145.636	Normal Conditions	SymbioGBR	HM185737		DGGE of ITS2 & sequencing	Bongaerts 2010 PLoS1 Genetic divergence across habitats in the widespread coral Seriatopora hystrix		2	2008	2	2008	Yes	brooder	hermaphrodite
5149	Turbinaria mesenterina	ITS2	C127	7.90223	NA	Dunsborough	Temperate Australasia	Southwest Australian Shelf	Leeuwin	15	15	15	-33.6141	115.116	Normal Cond		HQ328056		DGGE of ITS2 & sequencing	Silverstein 2011 MEPS Novel algal symbiont diversity in reef corals of Western Australia	2005-06-01	6	2005	6	2005	No	spawner	gonochore
5588	Pocillopora damicornis	ITS2	C42	7.90223	NA	Johnston Atoll, Hawaii	Eastern Indo-Pacific	Hawaii	Hawaii	15-20 m	15	20	18.078	-169.533	Normal Cond	Aquarist	AY765402		Cloning of ITS2 & sequencing	Stat 2009 MEPS Specificity in communities of Symbiodinium in corals from Johnston Atoll	June '06	6	2006	6	2006	Yes	brooder	hermaphrodite
5668	Pocillopora eydouxi	ITS2	C42	7.90223	NA	Johnston Atoll, Hawaii	Eastern Indo-Pacific	Hawaii	Hawaii	10-15 m	10	15	18.078	-169.533	Normal Cond	GenBank	AY765402		Cloning of ITS2 & sequencing	Stat 2009 MEPS Specificity in communities of Symbiodinium in corals from Johnston Atoll	June '06	6	2006	6	2006	Yes	spawner	hermaphrodite
16880	Pocillopora meandrina	ITS2	C42	7.90223	NA	Maro	Eastern Indo-Pacific	Hawaii	Hawaii	10-20'	10	20	25.5408	-170.798	Normal Conditions	Original pub			Cloning of ITS2 & sequencing	Stat 2015 CoralReefs Geographic structure and host specificity	2005-2009	NA	2005	NA	2009	Yes	spawner	hermaphrodite
17523	Pocillopora verrucosa	ITS2	C42	7.90223	NA	Moorea	Eastern Indo-Pacific	Central Polynesia	Society Islands	21	21	21	-17.5475	-149.769	Normal Conditions	Original Pub	HE579034	FR4	Cloning of ITS2 & sequencing	Putnam 2012 ProcRSocB Endosymbiotic flexibility associates with environ sensitivity	<6-2012	NA	NA	NA	NA	Yes	spawner	hermaphrodite
16854	Porites lobata	ITS2	C42	7.90223	NA	Gardner	Eastern Indo-Pacific	Hawaii	Hawaii	10-20'	10	20	25.0014	-168.237	Normal Conditions	Original pub			Cloning of ITS2 & sequencing	Stat 2015 CoralReefs Geographic structure and host specificity	2005-2009	NA	2005	NA	2009	Yes	spawner	gonochore
8916	Acropora abrotanoides	ITS2	C3z	8.78025	NA	Similan Islands	Western Indo-Pacific	Andaman	Andaman Sea Coral Coast	2-12	2	12	8.6525	97.6408	Normal Cond	Geosymbio			DGGE of ITS2 & sequencing	LaJeunesse 2010 JBiogeograph Long-standing environmental conditions isolation and host–symbiont specificity	2007-02-01	2	2007	2	2007	No	spawner	hermaphrodite
2435	Acropora aspera	ITS2	C3z	8.78025	NA	Racha	Western Indo-Pacific	Andaman	Andaman Sea Coral Coast	2-5	2	5	7.6101	98.3706	Normal Cond	Geosymbio	same_as_GU111884		DGGE of ITS2 & sequencing	LaJeunesse 2010 JBiogeograph Long-standing environmental conditions isolation and host–symbiont specificity	2007-02-01	2	2007	2	2007	No	spawner	hermaphrodite
8924	Acropora austera	ITS2	C3z	8.78025	NA	Racha	Western Indo-Pacific	Andaman	Andaman Sea Coral Coast	2-5	2	5	7.6101	98.3706	Normal Cond	Geosymbio			DGGE of ITS2 & sequencing	LaJeunesse 2010 JBiogeograph Long-standing environmental conditions isolation and host–symbiont specificity	2007-02-01	2	2007	2	2007	No	spawner	hermaphrodite
2437	Acropora clathrata	ITS2	C3z	8.78025	NA	Racha	Western Indo-Pacific	Andaman	Andaman Sea Coral Coast	2-5	2	5	7.6101	98.3706	Normal Cond	Geosymbio	same_as_GU111884		DGGE of ITS2 & sequencing	LaJeunesse 2010 JBiogeograph Long-standing environmental conditions isolation and host–symbiont specificity	2007-02-01	2	2007	2	2007	No	spawner	hermaphrodite
2439	Acropora cytherea	ITS2	C3z	8.78025	NA	Similan Islands	Western Indo-Pacific	Andaman	Andaman Sea Coral Coast	2-12	2	12	8.6525	97.6408	Normal Cond	Geosymbio	same_as_GU111884		DGGE of ITS2 & sequencing	LaJeunesse 2010 JBiogeograph Long-standing environmental conditions isolation and host–symbiont specificity	2007-02-01	2	2007	2	2007	No	spawner	hermaphrodite
2443	Acropora elseyi	ITS2	C3z	8.78025	NA	Racha	Western Indo-Pacific	Andaman	Andaman Sea Coral Coast	2-5	2	5	7.6101	98.3706	Normal Cond	Geosymbio	same_as_GU111884		DGGE of ITS2 & sequencing	LaJeunesse 2010 JBiogeograph Long-standing environmental conditions isolation and host–symbiont specificity	2007-02-01	2	2007	2	2007	No	spawner	hermaphrodite
8933	Acropora florida	ITS2	C3z	8.78025	NA	Racha	Western Indo-Pacific	Andaman	Andaman Sea Coral Coast	2-5	2	5	7.6101	98.3706	Normal Cond	Geosymbio			DGGE of ITS2 & sequencing	LaJeunesse 2010 JBiogeograph Long-standing environmental conditions isolation and host–symbiont specificity	2007-02-01	2	2007	2	2007	No	spawner	hermaphrodite
8936	Acropora gemmifera	ITS2	C3z	8.78025	NA	Similan Islands	Western Indo-Pacific	Andaman	Andaman Sea Coral Coast	2-12	2	12	8.6525	97.6408	Normal Cond	Geosymbio			DGGE of ITS2 & sequencing	LaJeunesse 2010 JBiogeograph Long-standing environmental conditions isolation and host–symbiont specificity	2007-02-01	2	2007	2	2007	No	spawner	hermaphrodite
8938	Acropora glauca	ITS2	C3z	8.78025	NA	Bawe	Western Indo-Pacific	Western Indian Ocean	East African Coral Coast	2-6	2	6	-6.15054	39.1315	Normal Cond	Geosymbio			DGGE of ITS2 & sequencing	LaJeunesse 2010 JBiogeograph Long-standing environmental conditions isolation and host–symbiont specificity	2007-04-01	4	2007	4	2007	no	spawner	hermaphrodite
X8	Acropora hemprichii	ITS2	C3z	8.78025	NA	Changuu	Western Indo-Pacific	Western Indian Ocean	East African Coral Coast		4	7	-6.12007	39.1681	Normal Cond	Original publication			DGGE of ITS2 & sequencing	Chauka 2016 AfrJMarSci Influence of local environmental conditions and bleaching histories						No	spawner	hermaphrodite
8941	Acropora horrida	ITS2	C3z	8.78025	NA	Racha	Western Indo-Pacific	Andaman	Andaman Sea Coral Coast	2-5	2	5	7.6101	98.3706	Normal Cond	Geosymbio			DGGE of ITS2 & sequencing	LaJeunesse 2010 JBiogeograph Long-standing environmental conditions isolation and host–symbiont specificity	2007-02-01	2	2007	2	2007	No	spawner	hermaphrodite
2449	Acropora humilis	ITS2	C3z	8.78025	NA	Similan Islands	Western Indo-Pacific	Andaman	Andaman Sea Coral Coast	2-12	2	12	8.6525	97.6408	Normal Cond	Geosymbio	same_as_GU111884		DGGE of ITS2 & sequencing	LaJeunesse 2010 JBiogeograph Long-standing environmental conditions isolation and host–symbiont specificity	2007-02-01	2	2007	2	2007	No	spawner	hermaphrodite
8945	Acropora latistella	ITS2	C3z	8.78025	NA	Changuu	Western Indo-Pacific	Western Indian Ocean	East African Coral Coast	2-6	2	6	-6.12007	39.1681	Normal Cond	Geosymbio			DGGE of ITS2 & sequencing	LaJeunesse 2010 JBiogeograph Long-standing environmental conditions isolation and host–symbiont specificity	2007-04-01	4	2007	4	2007	No	spawner	hermaphrodite
8946	Acropora loripes	ITS2	C3z	8.78025	NA	Bawe	Western Indo-Pacific	Western Indian Ocean	East African Coral Coast	2-6	2	6	-6.15054	39.1315	Normal Cond	Geosymbio			DGGE of ITS2 & sequencing	LaJeunesse 2010 JBiogeograph Long-standing environmental conditions isolation and host–symbiont specificity	2007-04-01	4	2007	4	2007	No	spawner	hermaphrodite
8947	Acropora lutkeni	ITS2	C3z	8.78025	NA	Bawe	Western Indo-Pacific	Western Indian Ocean	East African Coral Coast	2-6	2	6	-6.15054	39.1315	Normal Cond	Geosymbio			DGGE of ITS2 & sequencing	LaJeunesse 2010 JBiogeograph Long-standing environmental conditions isolation and host–symbiont specificity	2007-04-01	4	2007	4	2007	No	spawner	hermaphrodite
15497	Acropora millepora	ITS2	C3z	8.78025	NA	Nosy Bé	Western Indo-Pacific	Western Indian Ocean	Western and Northern Madagascar		1	30	-13.4	48	Normal conditions	Original publication		collected at SCUBA depths	DGGE of ITS2 & sequencing	Boonstra 2011 Diss Latitudinal Patterns in the Distribution of Algal Symbionts		9	2001	9	2001	No	spawner	hermaphrodite
8957	Acropora muricata	ITS2	C3z	8.78025	NA	Racha	Western Indo-Pacific	Andaman	Andaman Sea Coral Coast	2-5	2	5	7.6101	98.3706	Normal Cond	Geosymbio			DGGE of ITS2 & sequencing	LaJeunesse 2010 JBiogeograph Long-standing environmental conditions isolation and host–symbiont specificity	2007-02-01	2	2007	2	2007	NA	spawner	hermaphrodite
15486	Acropora nasuta	ITS2	C3z	8.78025	NA	Fort Dauphin	Western Indo-Pacific	Western Indian Ocean	Southeast Madagascar		1	30	-25	46.9	Normal conditions	Original publication		collected at SCUBA depths	DGGE of ITS2 & sequencing	Boonstra 2011 Diss Latitudinal Patterns in the Distribution of Algal Symbionts		9	2001	9	2001	No	spawner	hermaphrodite
9213	Acropora robusta	ITS5	C3z	8.78025	NA	Racha	Western Indo-Pacific	Andaman	Andaman Sea Coral Coast	2-5	2	5	7.6101	98.3706	Normal Cond	Geosymbio			DGGE of ITS2 & sequencing	LaJeunesse 2010 JBiogeograph Long-standing environmental conditions isolation and host–symbiont specificity	2007-02-01	2	2007	2	2007	No	spawner	hermaphrodite
X9	Acropora retusa	ITS5	C3z	8.78025	NA	Zanzibar	Western Indo-Pacific	Western Indian Ocean	East African Coral Coast		1	7	-6.15262	39.136	Normal Cond	Direct from publication			DGGE of ITS2 & sequencing	Chauka 2012 WIndOceaJMarSci Diversity of Symbiodinium in Tanzania		4	2008	4	2008	No	spawner	hermaphrodite
X10	Acropora rudis	ITS2	C3z	8.78025	NA	Similan Islands	Western Indo-Pacific	Andaman	Andaman Sea Coral Coast	2-12	2	12	8.6525	97.6408	Normal Cond	Geosymbio			DGGE of ITS2 & sequencing	LaJeunesse 2010 JBiogeograph Long-standing environmental conditions isolation and host–symbiont specificity	2007-02-01	2	2007	2	2007	No	spawner	hermaphrodite
9215	Acropora samoensis	ITS2	C3z	8.78025	NA	Changuu	Western Indo-Pacific	Western Indian Ocean	East African Coral Coast	2-6	2	6	-6.12007	39.1681	Normal Cond	Geosymbio			DGGE of ITS2 & sequencing	LaJeunesse 2010 JBiogeograph Long-standing environmental conditions isolation and host–symbiont specificity	2007-04-01	4	2007	4	2007	No	spawner	hermaphrodite
2469	Acropora secale	ITS2	C3z	8.78025	NA	Racha	Western Indo-Pacific	Andaman	Andaman Sea Coral Coast	2-5	2	5	7.6101	98.3706	Normal Cond	Geosymbio	same_as_GU111884		DGGE of ITS2 & sequencing	LaJeunesse 2010 JBiogeograph Long-standing environmental conditions isolation and host–symbiont specificity	2007-02-01	2	2007	2	2007	No	spawner	hermaphrodite
8971	Acropora solitaryensis	ITS2	C3z	8.78025	NA	Banda Kuu	Western Indo-Pacific	Western Indian Ocean	East African Coral Coast	3-12	3	12	-5.73012	39.3035	Normal Cond	Geosymbio			DGGE of ITS2 & sequencing	LaJeunesse 2010 JBiogeograph Long-standing environmental conditions isolation and host–symbiont specificity	2007-04-01	4	2007	4	2007	No	spawner	hermaphrodite
8979	Acropora subulata	ITS2	C3z	8.78025	NA	Similan Islands	Western Indo-Pacific	Andaman	Andaman Sea Coral Coast	2-12	2	12	8.6525	97.6408	Normal Cond	Geosymbio			DGGE of ITS2 & sequencing	LaJeunesse 2010 JBiogeograph Long-standing environmental conditions isolation and host–symbiont specificity	2007-02-01	2	2007	2	2007	No	spawner	hermaphrodite
8985	Acropora tenuis	ITS2	C3z	8.78025	NA	Racha	Western Indo-Pacific	Andaman	Andaman Sea Coral Coast	2-5	2	5	7.6101	98.3706	Normal Cond	Geosymbio			DGGE of ITS2 & sequencing	LaJeunesse 2010 JBiogeograph Long-standing environmental conditions isolation and host–symbiont specificity	2007-02-01	2	2007	2	2007	No	spawner	hermaphrodite
8993	Acropora valida	ITS2	C3z	8.78025	NA	Racha	Western Indo-Pacific	Andaman	Andaman Sea Coral Coast	2-5	2	5	7.6101	98.3706	Normal Cond	Geosymbio			DGGE of ITS2 & sequencing	LaJeunesse 2010 JBiogeograph Long-standing environmental conditions isolation and host–symbiont specificity	2007-02-01	2	2007	2	2007	No	spawner	hermaphrodite
16114	Coscinaraea monile	ITS2	C3z	8.78025	NA	Vohemar	Western Indo-Pacific	Western Indian Ocean	Western and Northern Madagascar		1	30	-13.4	50	Normal conditions	Original publication		collected at SCUBA depths	DGGE of ITS2 & sequencing	Boonstra 2011 Diss Latitudinal Patterns in the Distribution of Algal Symbionts		9	2001	9	2001	No	spawner	gonochore
15511	Diploastrea heliopora	ITS2	C3z	8.78025	NA	Nosy Bé	Western Indo-Pacific	Western Indian Ocean	Western and Northern Madagascar		1	30	-13.4	48	Normal conditions	Original publication		collected at SCUBA depths	DGGE of ITS2 & sequencing	Boonstra 2011 Diss Latitudinal Patterns in the Distribution of Algal Symbionts		9	2001	9	2001	No	spawner	gonochore
15517	Dipsastraea favus	ITS2	C3z	8.78025	NA	Nosy Bé	Western Indo-Pacific	Western Indian Ocean	Western and Northern Madagascar		1	30	-13.4	48	Normal conditions	Original publication		collected at SCUBA depths	DGGE of ITS2 & sequencing	Boonstra 2011 Diss Latitudinal Patterns in the Distribution of Algal Symbionts		9	2001	9	2001	NA	NA	NA
2522	Favites abdita	ITS2	C3z	8.78025	NA	Similan Islands	Western Indo-Pacific	Andaman	Andaman Sea Coral Coast	2-12	2	12	8.6525	97.6408	Normal Cond	Geosymbio	same_as_GU111884		DGGE of ITS2 & sequencing	LaJeunesse 2010 JBiogeograph Long-standing environmental conditions isolation and host–symbiont specificity	2007-02-01	2	2007	2	2007	No	spawner	hermaphrodite
15487	Favites pentagona	ITS2	C3z	8.78025	NA	Fort Dauphin	Western Indo-Pacific	Western Indian Ocean	Southeast Madagascar		1	30	-25	46.9	Normal conditions	Original publication		collected at SCUBA depths	DGGE of ITS2 & sequencing	Boonstra 2011 Diss Latitudinal Patterns in the Distribution of Algal Symbionts		9	2001	9	2001	No	spawner	hermaphrodite
15697	Galaxea fascicularis	ITS2	C3z	8.78025	NA	Nosy Bé	Western Indo-Pacific	Western Indian Ocean	Western and Northern Madagascar		1	30	-13.4	48	Normal conditions	Original publication		collected at SCUBA depths	DGGE of ITS2 & sequencing	Boonstra 2011 Diss Latitudinal Patterns in the Distribution of Algal Symbionts		3	2007	3	2007	No	spawner	gonochore
9043	Goniastrea edwardsi	ITS2	C3z	8.78025	NA	Racha	Western Indo-Pacific	Andaman	Andaman Sea Coral Coast	2-5	2	5	7.6101	98.3706	Normal Cond	Geosymbio			DGGE of ITS2 & sequencing	LaJeunesse 2010 JBiogeograph Long-standing environmental conditions isolation and host–symbiont specificity	2007-02-01	2	2007	2	2007	No	spawner	hermaphrodite
9044	Goniastrea favulus	ITS2	C3z	8.78025	NA	Changuu	Western Indo-Pacific	Western Indian Ocean	East African Coral Coast	2-6	2	6	-6.12007	39.1681	Normal Cond	Geosymbio			DGGE of ITS2 & sequencing	LaJeunesse 2010 JBiogeograph Long-standing environmental conditions isolation and host–symbiont specificity	2007-04-01	4	2007	4	2007	No	spawner	hermaphrodite
15636	Goniastrea retiformis	ITS2	C3z	8.78025	NA	Nosy Bé	Western Indo-Pacific	Western Indian Ocean	Western and Northern Madagascar		1	30	-13.4	48	Normal conditions	Original publication		collected at SCUBA depths	DGGE of ITS2 & sequencing	Boonstra 2011 Diss Latitudinal Patterns in the Distribution of Algal Symbionts		3	2007	3	2007	No	spawner	hermaphrodite
9053	Goniastrea stelligera	ITS2	C3z	8.78025	NA	Racha	Western Indo-Pacific	Andaman	Andaman Sea Coral Coast	2-5	2	5	7.6101	98.3706	Normal Cond	Geosymbio			DGGE of ITS2 & sequencing	LaJeunesse 2010 JBiogeograph Long-standing environmental conditions isolation and host–symbiont specificity	2007-02-01	2	2007	2	2007	NA	spawner	hermaphrodite
16089	Hydnophora exesa	ITS2	C3z	8.78025	NA	Vohemar	Western Indo-Pacific	Western Indian Ocean	Western and Northern Madagascar		1	30	-13.4	50	Normal conditions	Original publication		collected at SCUBA depths	DGGE of ITS2 & sequencing	Boonstra 2011 Diss Latitudinal Patterns in the Distribution of Algal Symbionts		9	2001	9	2001	No	spawner	hermaphrodite
15671	Hydnophora microconos	ITS2	C3z	8.78025	NA	Nosy Bé	Western Indo-Pacific	Western Indian Ocean	Western and Northern Madagascar		1	30	-13.4	48	Normal conditions	Original publication		collected at SCUBA depths	DGGE of ITS2 & sequencing	Boonstra 2011 Diss Latitudinal Patterns in the Distribution of Algal Symbionts		3	2007	3	2007	No	spawner	hermaphrodite
15493	Isopora cuneata	ITS2	C3z	8.78025	NA	Nosy Bé	Western Indo-Pacific	Western Indian Ocean	Western and Northern Madagascar		1	30	-13.4	48	Normal conditions	Original publication		collected at SCUBA depths	DGGE of ITS2 & sequencing	Boonstra 2011 Diss Latitudinal Patterns in the Distribution of Algal Symbionts		9	2001	9	2001	NA	brooder	hermaphrodite
15498	Isopora palifera	ITS2	C3z	8.78025	NA	Nosy Bé	Western Indo-Pacific	Western Indian Ocean	Western and Northern Madagascar		1	30	-13.4	48	Normal conditions	Original publication		collected at SCUBA depths	DGGE of ITS2 & sequencing	Boonstra 2011 Diss Latitudinal Patterns in the Distribution of Algal Symbionts		9	2001	9	2001	No	brooder	hermaphrodite
15524	Leptoria phrygia	ITS2	C3z	8.78025	NA	Nosy Bé	Western Indo-Pacific	Western Indian Ocean	Western and Northern Madagascar		1	30	-13.4	48	Normal conditions	Original publication		collected at SCUBA depths	DGGE of ITS2 & sequencing	Boonstra 2011 Diss Latitudinal Patterns in the Distribution of Algal Symbionts		9	2001	9	2001	No	spawner	hermaphrodite
9090	Merulina ampliata	ITS2	C3z	8.78025	NA	Similan Islands	Western Indo-Pacific	Andaman	Andaman Sea Coral Coast	2-12	2	12	8.6525	97.6408	Normal Cond	Geosymbio			DGGE of ITS2 & sequencing	LaJeunesse 2010 JBiogeograph Long-standing environmental conditions isolation and host–symbiont specificity	2007-02-01	2	2007	2	2007	No	spawner	hermaphrodite
X11	Platygyra crosslandi	ITS2	C3z	8.78025	NA	Nosy Bé	Western Indo-Pacific	Western Indian Ocean	Western and Northern Madagascar		1	30	-13.4	48	Normal conditions	Original publication		collected at SCUBA depths	DGGE of ITS2 & sequencing	Boonstra 2011 Diss Latitudinal Patterns in the Distribution of Algal Symbionts		9	2001	9	2001	No	spawner	hermaphrodite
2651	Platygyra daedalea	ITS2	C3z	8.78025	NA	Bawe	Western Indo-Pacific	Western Indian Ocean	East African Coral Coast	2-6	2	6	-6.15054	39.1315	Normal Cond	Geosymbio	same_as_GU111884		DGGE of ITS2 & sequencing	LaJeunesse 2010 JBiogeograph Long-standing environmental conditions isolation and host–symbiont specificity	2007-04-01	4	2007	4	2007	No	spawner	hermaphrodite
15530	Platygyra pini	ITS2	C3z	8.78025	NA	Nosy Bé	Western Indo-Pacific	Western Indian Ocean	Western and Northern Madagascar		1	30	-13.4	48	Normal conditions	Original publication		collected at SCUBA depths	DGGE of ITS2 & sequencing	Boonstra 2011 Diss Latitudinal Patterns in the Distribution of Algal Symbionts		9	2001	9	2001	No	spawner	hermaphrodite
15556	Porites cylindrica	ITS2	C3z	8.78025	NA	Nosy Bé	Western Indo-Pacific	Western Indian Ocean	Western and Northern Madagascar		1	30	-13.4	48	Normal conditions	Original publication		collected at SCUBA depths	DGGE of ITS2 & sequencing	Boonstra 2011 Diss Latitudinal Patterns in the Distribution of Algal Symbionts		9	2001	9	2001	Yes	spawner	gonochore
15772	Porites lutea	ITS2	C3z	8.78025	NA	Nosy Bé	Western Indo-Pacific	Western Indian Ocean	Western and Northern Madagascar		1	30	-13.4	48	Normal conditions	Original publication		collected at SCUBA depths	DGGE of ITS2 & sequencing	Boonstra 2011 Diss Latitudinal Patterns in the Distribution of Algal Symbionts		3	2007	3	2007	Yes	spawner	gonochore
9379	Orbicella annularis	ITS2	B1j	8.85342	NA	Barbados	Tropical Atlantic	Tropical Northwestern Atlantic	Eastern Caribbean	6-10	6	10	13.07	-60	Normal Cond	Original pub			DGGE of ITS2 & sequencing	Finney 2010 MicrobEcol The Relative Significance of Host–Habitat	Jul 02 -Aug 03	7	2002	8	2003	No	spawner	hermaphrodite
1588	Orbicella faveolata	ITS2	B1j	8.85342	NA	Barbados	Tropical Atlantic	Tropical Northwestern Atlantic	Eastern Caribbean	1-5	1	5	13.07	-60	Normal Cond	Original pub	same_as_GU907637		DGGE of ITS2 & sequencing	Finney 2010 MicrobEcol The Relative Significance of Host–Habitat	Jul 02 -Aug 03	7	2002	8	2003	No	spawner	hermaphrodite
X12	Montastraea cavernosa	ITS2	C3-p	8.85342	NA	Barbados	Tropical Atlantic	Tropical Northwestern Atlantic	Eastern Caribbean	1-5	1	5	13.07	-60	Normal Cond	Original pub	same_as_GU907637		DGGE of ITS2 & sequencing	Finney 2010 MicrobEcol The Relative Significance of Host–Habitat	Jul 02 -Aug 03	7	2002	8	2003	No	spawner	gonochore
9381	Orbicella annularis	ITS2	C7a	8.85342	NA	Barbados	Tropical Atlantic	Tropical Northwestern Atlantic	Eastern Caribbean	6-10	6	10	13.07	-60	Normal Cond	Original pub			DGGE of ITS2 & sequencing	Finney 2010 MicrobEcol The Relative Significance of Host–Habitat	Jul 02 -Aug 03	7	2002	8	2003	No	spawner	hermaphrodite
1593	Orbicella faveolata	ITS2	C7a	8.85342	NA	Barbados	Tropical Atlantic	Tropical Northwestern Atlantic	Eastern Caribbean	1-5	1	5	13.07	-60	Normal Cond	Original pub	N_A		DGGE of ITS2 & sequencing	Finney 2010 MicrobEcol The Relative Significance of Host–Habitat	Jul 02 -Aug 03	7	2002	8	2003	No	spawner	hermaphrodite
1609	Orbicella franksi	ITS2	C7a	8.85342	NA	Barbados	Tropical Atlantic	Tropical Northwestern Atlantic	Eastern Caribbean	>10	10	30	13.07	-60	Normal Cond	Original pub	N_A		DGGE of ITS2 & sequencing	Finney 2010 MicrobEcol The Relative Significance of Host–Habitat	Jul 02 -Aug 03	7	2002	8	2003	No	spawner	hermaphrodite
9282	Dichocoenia stokesii	ITS2	C81	8.85342	NA	Barbados	Tropical Atlantic	Tropical Northwestern Atlantic	Eastern Caribbean	>10	10	30	13.07	-60	Normal Cond	Original pub			DGGE of ITS2 & sequencing	Finney 2010 MicrobEcol The Relative Significance of Host–Habitat	Jul 02 -Aug 03	7	2002	8	2003	NA	spawner	NA
9288	Diploria labyrinthiformis	ITS2	C81	8.85342	NA	Barbados	Tropical Atlantic	Tropical Northwestern Atlantic	Eastern Caribbean	6-10	6	10	13.07	-60	Normal Cond	Original pub			DGGE of ITS2 & sequencing	Finney 2010 MicrobEcol The Relative Significance of Host–Habitat	Jul 02 -Aug 03	7	2002	8	2003	No	spawner	hermaphrodite
1553	Favia fragum	ITS2	C81	8.85342	NA	Barbados	Tropical Atlantic	Tropical Northwestern Atlantic	Eastern Caribbean	>10	10	30	13.07	-60	Normal Cond	Original pub	GU907657		DGGE of ITS2 & sequencing	Finney 2010 MicrobEcol The Relative Significance of Host–Habitat	Jul 02 -Aug 03	7	2002	8	2003	Yes	brooder	hermaphrodite
9415	Siderastrea siderea	ITS2	C81	8.85342	NA	Barbados	Tropical Atlantic	Tropical Northwestern Atlantic	Eastern Caribbean	>10	10	30	13.07	-60	Normal Cond	Original pub			DGGE of ITS2 & sequencing	Finney 2010 MicrobEcol The Relative Significance of Host–Habitat	Jul 02 -Aug 03	7	2002	8	2003	No	spawner	gonochore
13676	Montipora capitata	ITS2	C7	10.3597	87	French Frigate Shoals	Eastern Indo-Pacific	Hawaii	Hawaii	1-8	1	8	23.51.380	-166.19.008	Normal Conditions	Original publication		7 Low TSA	Cloning of ITS2 & sequencing	Stat 2013 Ecol&Evol Distribution of the thermally tolerant symbiont lineage Symbiodinium in corals from Hawaii	2007-08-01	8	2007	8	2007	Yes	spawner	hermaphrodite
14013	Orbicella annularis	ITS2	C7	10.3597	NA	Carrie Bow Cay, Belize	Tropical Atlantic	Tropical Northwestern Atlantic	Western Caribbean	15	15	15	16.803	-88.0816	Normal Conditions	Aquarist		Listed as Montastraea annularis	DGGE of ITS2 & sequencing	Warner 2006 LimnolOceanograph The ecological distribution and comparative photobiology of symbiotic dinoflagellates from reef corals in Belize	2002-09-01	9	2002	9	2002	No	spawner	hermaphrodite
7594	Orbicella faveolata	ITS2	C7	10.3597	NA	Carrie Bow Cay, Belize	Tropical Atlantic	Tropical Northwestern Atlantic	Western Caribbean	25	25	25	16.803	-88.0816	Normal Conditions	Aquarist		Listed as Montastraea faveolata	DGGE of ITS2 & sequencing	Warner 2006 LimnolOceanograph The ecological distribution and comparative photobiology of symbiotic dinoflagellates from reef corals in Belize	2002-03	NA	2002	NA	2003	No	spawner	hermaphrodite
12120	Orbicella franksi	ITS2	C7	10.3597	10m-Mfra-01	Curaçao	Tropical Atlantic	Tropical Northwestern Atlantic	Southern Caribbean	10	10	10	12.1252	-68.9742	Normal Conditions	Original publication			DGGE of ITS2 & sequencing	Bongaerts 2015 RoySocOpenSci Prevalent endosymbiont zoantion		11	2009	11	2009	No	spawner	hermaphrodite
12627	Porites astreoides	ITS2	C7	10.3597	02m-Past-05	Curaçao	Tropical Atlantic	Tropical Northwestern Atlantic	Southern Caribbean	2	2	2	12.1252	-68.9742	Normal Conditions	Original publication			DGGE of ITS2 & sequencing	Bongaerts 2015 RoySocOpenSci Prevalent endosymbiont zoantion		11	2009	11	2009	Yes	brooder	Mixed
15119	Siderastrea savignyana	ITS2	C7	10.3597	NA	Hengam Island, Iran	Western Indo-Pacific	Somali/Arabian	Arabian (Persian) Gulf	5-7	5	7	26.6816	55.8954	Normal Conditions	Direct from Publication		Site 2	DGGE of ITS2 & sequencing	Mashini 2015 JEMBE Comparison of Symbiodinium populations in corals from subtidal	2012-02-16	2	2012	2	2012	NA	NA	NA
12937	Siderastrea siderea	ITS2	C7	10.3597	10m-Ssid-03	Curaçao	Tropical Atlantic	Tropical Northwestern Atlantic	Southern Caribbean	10	10	10	12.1252	-68.9742	Normal Conditions	Original publication			DGGE of ITS2 & sequencing	Bongaerts 2015 RoySocOpenSci Prevalent endosymbiont zoantion		7	2008	8	2008	No	spawner	gonochore
X13	Australophyllia wilsoni	ITS2	C7	10.3597	NA	Dunsborough	Temperate Australasia	Southwest Australian Shelf	Leeuwin	15	15	15	-33.6141	115.116	Normal Cond				DGGE of ITS2 & sequencing	Silverstein 2011 MEPS Novel algal symbiont diversity in reef corals of Western Australia	2005-06-01	6	2005	6	2005	No	spawner	hermaphrodite
6309	Orbicella annularis	ITS2	B10	10.6241	NA	Florida Keys	Tropical Atlantic	Tropical Northwestern Atlantic	Floridian	3	3	3	24.98	-80.36	Normal conditions	GeoSymbio		Little Grecian	DGGE of ITS2	Thornhill 2006 MarBiol Multi-year seasonal genotypic surveys of coral-algal symbioses		11	2002	11	2002	No	spawner	hermaphrodite
6273	Orbicella faveolata	ITS2	B10	10.6241	NA	Florida Keys	Tropical Atlantic	Tropical Northwestern Atlantic	Floridian	12	12	12	24.98	-80.36	Normal conditions	GeoSymbio		Conch	DGGE of ITS2	Thornhill 2006 MarBiol Multi-year seasonal genotypic surveys of coral-algal symbioses		11	2002	11	2002	No	spawner	hermaphrodite
6337	Orbicella franksi	ITS2	B10	10.6241	NA	Lee Stocking Island	Tropical Atlantic	Tropical Northwestern Atlantic	Bahamian	12	12	12	24.25	-76.5	Normal conditions	GeoSymbio		Alligator	DGGE of ITS2	Thornhill 2006 MarBiol Multi-year seasonal genotypic surveys of coral-algal symbioses		11	2002	11	2002	No	spawner	hermaphrodite
13754	Montipora capitata	ITS2	C17.2	10.6241	126	Pearl & Hermes	Eastern Indo-Pacific	Hawaii	Hawaii	1-8	1	8	27.56.580	-175.44.447	Normal Conditions	Original publication		20 Intermediate TSA	Cloning of ITS2 & sequencing	Stat 2013 Ecol&Evol Distribution of the thermally tolerant symbiont lineage Symbiodinium in corals from Hawaii	2007-08-01	8	2007	8	2007	Yes	spawner	hermaphrodite
13922	Porites lobata	ITS2	C17.2	10.6241	202	French Frigate Shoals	Eastern Indo-Pacific	Hawaii	Hawaii	1-8	1	8	23.51.380	-166.19.008	Normal Conditions	Original publication		7 Low TSA	Cloning of ITS2 & sequencing	Stat 2013 Ecol&Evol Distribution of the thermally tolerant symbiont lineage Symbiodinium in corals from Hawaii	2007-08-01	8	2007	8	2007	Yes	spawner	gonochore
12719	Porites porites	ITS2	C47	11.4874	5m-Ppor-01	Curaçao	Tropical Atlantic	Tropical Northwestern Atlantic	Southern Caribbean	5	5	5	12.1252	-68.9742	Normal Conditions	Original publication			DGGE of ITS2 & sequencing	Bongaerts 2015 RoySocOpenSci Prevalent endosymbiont zoantion		11	2009	11	2009	Yes	brooder	gonochore
X14	Porites divaricata	ITS2	C47	11.4874	NA	Puerto Morelos	Tropical Atlantic	Tropical Northwestern Atlantic	Southern Gulf of Mexico	3-6	3	6	21	-87	Normal Cond	Original pub			DGGE of ITS2 & sequencing	Aschaffenburg 2012 Diss Phsyiological response of Symbiodinium spp		6	2009	6	2009	Yes	brooder	gonochore
8922	Acropora austera	ITS2	C101	13.1704	NA	Koh Hae	Western Indo-Pacific	Andaman	Andaman Sea Coral Coast	2-6	2	6	7.7456	98.3763	Normal Cond	Geosymbio			DGGE of ITS2 & sequencing	LaJeunesse 2010 JBiogeograph Long-standing environmental conditions isolation and host–symbiont specificity	2007-02-01	2	2007	2	2007	No	spawner	hermaphrodite
8926	Acropora cerealis	ITS2	C101	13.1704	NA	Similan Islands	Western Indo-Pacific	Andaman	Andaman Sea Coral Coast	2-12	2	12	8.6525	97.6408	Normal Cond	Geosymbio			DGGE of ITS2 & sequencing	LaJeunesse 2010 JBiogeograph Long-standing environmental conditions isolation and host–symbiont specificity	2007-02-01	2	2007	2	2007	No	spawner	hermaphrodite
8927	Acropora divaricata	ITS2	C101	13.1704	NA	Ko Phi Phi Don	Western Indo-Pacific	Andaman	Andaman Sea Coral Coast	2-6	2	6	7.7333	98.7667	Normal Cond	Geosymbio			DGGE of ITS2 & sequencing	LaJeunesse 2010 JBiogeograph Long-standing environmental conditions isolation and host–symbiont specificity	2007-02-01	2	2007	2	2007	No	spawner	hermaphrodite
8930	Acropora florida	ITS2	C101	13.1704	NA	Ko Phi Phi Don	Western Indo-Pacific	Andaman	Andaman Sea Coral Coast	2-6	2	6	7.7333	98.7667	Normal Cond	Geosymbio			DGGE of ITS2 & sequencing	LaJeunesse 2010 JBiogeograph Long-standing environmental conditions isolation and host–symbiont specificity	2007-02-01	2	2007	2	2007	No	spawner	hermaphrodite
8939	Acropora grandis	ITS2	C101	13.1704	NA	Ko Phi Phi Don	Western Indo-Pacific	Andaman	Andaman Sea Coral Coast	2-6	2	6	7.7333	98.7667	Normal Cond	Geosymbio			DGGE of ITS2 & sequencing	LaJeunesse 2010 JBiogeograph Long-standing environmental conditions isolation and host–symbiont specificity	2007-02-01	2	2007	2	2007	No	spawner	hermaphrodite
2444	Acropora humilis	ITS2	C101	13.1704	NA	Racha	Western Indo-Pacific	Andaman	Andaman Sea Coral Coast	2-5	2	5	7.6101	98.3706	Normal Cond	Geosymbio	same_as_GU111881		DGGE of ITS2 & sequencing	LaJeunesse 2010 JBiogeograph Long-standing environmental conditions isolation and host–symbiont specificity	2007-02-01	2	2007	2	2007	No	spawner	hermaphrodite
2450	Acropora hyacinthus	ITS2	C101	13.1704	NA	Cape Panwa	Western Indo-Pacific	Andaman	Andaman Sea Coral Coast	0-5	0	5	7.8073	98.4092	Normal Cond	Geosymbio	same_as_GU111881		DGGE of ITS2 & sequencing	LaJeunesse 2010 JBiogeograph Long-standing environmental conditions isolation and host–symbiont specificity	2007-02-01	2	2007	2	2007	No	spawner	hermaphrodite
9210	Acropora microphthalma	ITS3	C101	13.1704	NA	Koh Hae	Western Indo-Pacific	Andaman	Andaman Sea Coral Coast	2-6	2	6	7.7456	98.3763	Normal Cond	Geosymbio			DGGE of ITS2 & sequencing	LaJeunesse 2010 JBiogeograph Long-standing environmental conditions isolation and host–symbiont specificity	2007-02-01	2	2007	2	2007	No	spawner	hermaphrodite
2457	Acropora millepora	ITS2	C101	13.1704	NA	Similan Islands	Western Indo-Pacific	Andaman	Andaman Sea Coral Coast	2-12	2	12	8.6525	97.6408	Normal Cond	Geosymbio	same_as_GU111881		DGGE of ITS2 & sequencing	LaJeunesse 2010 JBiogeograph Long-standing environmental conditions isolation and host–symbiont specificity	2007-02-01	2	2007	2	2007	No	spawner	hermaphrodite
2458	Acropora monticulosa	ITS2	C101	13.1704	NA	Racha	Western Indo-Pacific	Andaman	Andaman Sea Coral Coast	2-5	2	5	7.6101	98.3706	Normal Cond	Geosymbio	same_as_GU111881		DGGE of ITS2 & sequencing	LaJeunesse 2010 JBiogeograph Long-standing environmental conditions isolation and host–symbiont specificity	2007-02-01	2	2007	2	2007	No	spawner	hermaphrodite
8956	Acropora muricata	ITS2	C101	13.1704	NA	Koh Hae	Western Indo-Pacific	Andaman	Andaman Sea Coral Coast	2-6	2	6	7.7456	98.3763	Normal Cond	Geosymbio			DGGE of ITS2 & sequencing	LaJeunesse 2010 JBiogeograph Long-standing environmental conditions isolation and host–symbiont specificity	2007-02-01	2	2007	2	2007	NA	spawner	hermaphrodite
8959	Acropora nasuta	ITS2	C101	13.1704	NA	Cape Panwa	Western Indo-Pacific	Andaman	Andaman Sea Coral Coast	0-5	0	5	7.8073	98.4092	Normal Cond	Geosymbio			DGGE of ITS2 & sequencing	LaJeunesse 2010 JBiogeograph Long-standing environmental conditions isolation and host–symbiont specificity	2007-02-01	2	2007	2	2007	No	spawner	hermaphrodite
9214	Acropora robusta	ITS2	C101	13.1704	NA	Similan Islands	Western Indo-Pacific	Andaman	Andaman Sea Coral Coast	2-12	2	12	8.6525	97.6408	Normal Cond	Geosymbio			DGGE of ITS2 & sequencing	LaJeunesse 2010 JBiogeograph Long-standing environmental conditions isolation and host–symbiont specificity	2007-02-01	2	2007	2	2007	No	spawner	hermaphrodite
8969	Acropora samoensis	ITS2	C101	13.1704	NA	Koh Hae	Western Indo-Pacific	Andaman	Andaman Sea Coral Coast	2-6	2	6	7.7456	98.3763	Normal Cond	Geosymbio			DGGE of ITS2 & sequencing	LaJeunesse 2010 JBiogeograph Long-standing environmental conditions isolation and host–symbiont specificity	2007-02-01	2	2007	2	2007	No	spawner	hermaphrodite
2461	Acropora secale	ITS2	C101	13.1704	NA	Koh Hae	Western Indo-Pacific	Andaman	Andaman Sea Coral Coast	2-6	2	6	7.7456	98.3763	Normal Cond	Geosymbio	same_as_GU111881		DGGE of ITS2 & sequencing	LaJeunesse 2010 JBiogeograph Long-standing environmental conditions isolation and host–symbiont specificity	2007-02-01	2	2007	2	2007	No	spawner	hermaphrodite
8978	Acropora subulata	ITS2	C101	13.1704	NA	Koh Hae	Western Indo-Pacific	Andaman	Andaman Sea Coral Coast	2-6	2	6	7.7456	98.3763	Normal Cond	Geosymbio			DGGE of ITS2 & sequencing	LaJeunesse 2010 JBiogeograph Long-standing environmental conditions isolation and host–symbiont specificity	2007-02-01	2	2007	2	2007	No	spawner	hermaphrodite
8983	Acropora tenuis	ITS2	C101	13.1704	NA	Ko Phi Phi Don	Western Indo-Pacific	Andaman	Andaman Sea Coral Coast	2-6	2	6	7.7333	98.7667	Normal Cond	Geosymbio			DGGE of ITS2 & sequencing	LaJeunesse 2010 JBiogeograph Long-standing environmental conditions isolation and host–symbiont specificity	2007-02-01	2	2007	2	2007	No	spawner	hermaphrodite
8990	Acropora valida	ITS2	C101	13.1704	NA	Ko Phi Phi Don	Western Indo-Pacific	Andaman	Andaman Sea Coral Coast	2-6	2	6	7.7333	98.7667	Normal Cond	Geosymbio			DGGE of ITS2 & sequencing	LaJeunesse 2010 JBiogeograph Long-standing environmental conditions isolation and host–symbiont specificity	2007-02-01	2	2007	2	2007	No	spawner	hermaphrodite
8998	Astrea curta	ITS2	C101	13.1704	NA	Ko Phi Phi Leh	Western Indo-Pacific	Andaman	Andaman Sea Coral Coast	6-12	6	12	7.7333	98.7667	Normal Cond	Geosymbio			DGGE of ITS2 & sequencing	LaJeunesse 2010 JBiogeograph Long-standing environmental conditions isolation and host–symbiont specificity	2007-02-01	2	2007	2	2007	No	spawner	hermaphrodite
2513	Favites abdita	ITS2	C101	13.1704	NA	Cape Panwa	Western Indo-Pacific	Andaman	Andaman Sea Coral Coast	0-5	0	5	7.8073	98.4092	Normal Cond	Geosymbio	GU111881		DGGE of ITS2 & sequencing	LaJeunesse 2010 JBiogeograph Long-standing environmental conditions isolation and host–symbiont specificity	2007-02-01	2	2007	2	2007	No	spawner	hermaphrodite
2530	Favites halicora	ITS2	C101	13.1704	NA	Racha	Western Indo-Pacific	Andaman	Andaman Sea Coral Coast	2-5	2	5	7.6101	98.3706	Normal Cond	Geosymbio	same_as_GU111881		DGGE of ITS2 & sequencing	LaJeunesse 2010 JBiogeograph Long-standing environmental conditions isolation and host–symbiont specificity	2007-02-01	2	2007	2	2007	no	spawner	hermaphrodite
2578	Goniastrea retiformis	ITS2	C101	13.1704	NA	Koh Hae	Western Indo-Pacific	Andaman	Andaman Sea Coral Coast	2-6	2	6	7.7456	98.3763	Normal Cond	Geosymbio	same_as_GU111881		DGGE of ITS2 & sequencing	LaJeunesse 2010 JBiogeograph Long-standing environmental conditions isolation and host–symbiont specificity	2007-02-01	2	2007	2	2007	No	spawner	hermaphrodite
9052	Goniastrea stelligera	ITS2	C101	13.1704	NA	Ko Phi Phi Don	Western Indo-Pacific	Andaman	Andaman Sea Coral Coast	2-6	2	6	7.7333	98.7667	Normal Cond	Geosymbio			DGGE of ITS2 & sequencing	LaJeunesse 2010 JBiogeograph Long-standing environmental conditions isolation and host–symbiont specificity	2007-02-01	2	2007	2	2007	NA	spawner	hermaphrodite
2459	Isopora palifera	ITS2	C101	13.1704	NA	Koh Hae	Western Indo-Pacific	Andaman	Andaman Sea Coral Coast	2-6	2	6	7.7456	98.3763	Normal Cond	Geosymbio	same_as_GU111881		DGGE of ITS2 & sequencing	LaJeunesse 2010 JBiogeograph Long-standing environmental conditions isolation and host–symbiont specificity	2007-02-01	2	2007	2	2007	No	brooder	hermaphrodite
2600	Leptoria phrygia	ITS2	C101	13.1704	NA	Similan Islands	Western Indo-Pacific	Andaman	Andaman Sea Coral Coast	2-12	2	12	8.6525	97.6408	Normal Cond	Geosymbio	same_as_GU111881		DGGE of ITS2 & sequencing	LaJeunesse 2010 JBiogeograph Long-standing environmental conditions isolation and host–symbiont specificity	2007-02-01	2	2007	2	2007	No	spawner	hermaphrodite
2657	Platygyra sinensis	ITS2	C101	13.1704	NA	Racha	Western Indo-Pacific	Andaman	Andaman Sea Coral Coast	2-5	2	5	7.6101	98.3706	Normal Cond	Geosymbio	same_as_GU111881		DGGE of ITS2 & sequencing	LaJeunesse 2010 JBiogeograph Long-standing environmental conditions isolation and host–symbiont specificity	2007-02-01	2	2007	2	2007	No	spawner	hermaphrodite
X14	Oulastrea crispata	ITS2	D15	13.2801	NA	Toguchi	Central Indo-Pacific	South Kuroshio	South Kuroshio	1-3	1	3	27.08	127.15	Normal Cond				DGGE of ITS2 & sequencing	Lien 2013 MEPS Host genetics and Symbiodinium D diversity	2001-06	NA	2001	NA	2006	No	spawner	gonochore
14077	Plesiastrea versipora	ITS2	B18	15.8045	NA	Dunsborough	Temperate Australasia	Southwest Australian Shelf	Leeuwin	15	15	15	-33.6141	115.116	Normal Cond				DGGE of ITS2 & sequencing	Silverstein 2011 MEPS Novel algal symbiont diversity in reef corals of Western Australia	2005-06-01	6	2005	6	2005	No	spawner	gonochore
X15	Coscinaraea mcneilli	ITS2	B18	15.8045	NA	Dunsborough	Temperate Australasia	Southwest Australian Shelf	Leeuwin	15	15	15	-33.6141	115.116	Normal Cond				DGGE of ITS2 & sequencing	Silverstein 2011 MEPS Novel algal symbiont diversity in reef corals of Western Australia	2005-06-01	6	2005	6	2005	No	spawner	gonochore
18981	Orbicella annularis	ITS2	B17	17.2477	NA	Coral Gardens, Belize	Tropical Atlantic	Tropical Northwestern Atlantic	Western Caribbean		2	6	16.9672	-88.0359	Normal Cond	Original publication			DGGE of ITS2 & sequencing, RT-PCR of LSU	Kennedy 2015 CoralReefs Widespread prevalence of cryptic Symbiodinium D in O annularis	2006-01-01	1	2006	1	2006	No	spawner	hermaphrodite
7562	Orbicella faveolata	ITS2	B17	17.2477	NA	Carrie Bow Cay, Belize	Tropical Atlantic	Tropical Northwestern Atlantic	Western Caribbean	8	8	8	16.803	-88.0816	Normal Conditions	Aquarist		Listed as Montastraea faveolata	DGGE of ITS2 & sequencing	Warner 2006 LimnolOceanograph The ecological distribution and comparative photobiology of symbiotic dinoflagellates from reef corals in Belize	2002-03	NA	2002	NA	2003	No	spawner	hermaphrodite
X16	Goniopora fruticosa	ITS2	D5	17.5605	NA	Ko Phi Phi Don	Western Indo-Pacific	Andaman	Andaman Sea Coral Coast	2-6	2	6	7.7333	98.7667	Normal Cond	Geosymbio			DGGE of ITS2 & sequencing	LaJeunesse 2010 JBiogeograph Long-standing environmental conditions isolation and host–symbiont specificity	2007-02-01	2	2007	2	2007	No	spawner	gonochore
9235	Montipora aequituberculata	ITS2	D5	17.5605	NA	Koh Hae	Western Indo-Pacific	Andaman	Andaman Sea Coral Coast	2-6	2	6	7.7456	98.3763	Normal Cond	Geosymbio			DGGE of ITS2 & sequencing	LaJeunesse 2010 JBiogeograph Long-standing environmental conditions isolation and host–symbiont specificity	2007-02-01	2	2007	2	2007	Yes	spawner	hermaphrodite
9098	Montipora caliculata	ITS2	D5	17.5605	NA	Ko Phi Phi Don	Western Indo-Pacific	Andaman	Andaman Sea Coral Coast	2-6	2	6	7.7333	98.7667	Normal Cond	Geosymbio			DGGE of ITS2 & sequencing	LaJeunesse 2010 JBiogeograph Long-standing environmental conditions isolation and host–symbiont specificity	2007-02-01	2	2007	2	2007	Yes	spawner	hermaphrodite
X17	Montipora efflorescens	ITS2	D5	17.5605	NA	Ko Phi Phi Don	Western Indo-Pacific	Andaman	Andaman Sea Coral Coast	2-6	2	6	7.7333	98.7667	Normal Cond	Geosymbio			DGGE of ITS2 & sequencing	LaJeunesse 2010 JBiogeograph Long-standing environmental conditions isolation and host–symbiont specificity	2007-02-01	2	2007	2	2007	Yes	spawner	hermaphrodite
9112	Montipora hispida	ITS2	D5	17.5605	NA	Racha	Western Indo-Pacific	Andaman	Andaman Sea Coral Coast	2-5	2	5	7.6101	98.3706	Normal Cond	Geosymbio			DGGE of ITS2 & sequencing	LaJeunesse 2010 JBiogeograph Long-standing environmental conditions isolation and host–symbiont specificity	2007-02-01	2	2007	2	2007	Yes	spawner	hermaphrodite
9117	Montipora tuberculosa	ITS2	D5	17.5605	NA	Cape Panwa	Western Indo-Pacific	Andaman	Andaman Sea Coral Coast	0-5	0	5	7.8073	98.4092	Normal Cond	Geosymbio			DGGE of ITS2 & sequencing	LaJeunesse 2010 JBiogeograph Long-standing environmental conditions isolation and host–symbiont specificity	2007-02-01	2	2007	2	2007	Yes	spawner	hermaphrodite
2618	Montipora verrucosa	ITS2	D5	17.5605	NA	Racha	Western Indo-Pacific	Andaman	Andaman Sea Coral Coast	2-5	2	5	7.6101	98.3706	Normal Cond	Geosymbio	same_as_EU812743		DGGE of ITS2 & sequencing	LaJeunesse 2010 JBiogeograph Long-standing environmental conditions isolation and host–symbiont specificity	2007-02-01	2	2007	2	2007	Yes	spawner	hermaphrodite
15090	Platygyra daedalea	ITS2	D5	17.5605	NA	Hengam Island, Iran	Western Indo-Pacific	Somali/Arabian	Arabian (Persian) Gulf	0.3	0.3	0.3	26.6816	55.8954	Normal Conditions	Direct from Publication		Site 1	DGGE of ITS2 & sequencing	Mashini 2015 JEMBE Comparison of Symbiodinium populations in corals from subtidal	2012-02-17	2	2012	2	2012	No	spawner	hermaphrodite
2671	Pocillopora damicornis	ITS2	D5	17.5605	NA	Cape Panwa	Western Indo-Pacific	Andaman	Andaman Sea Coral Coast	0-5	0	5	7.8073	98.4092	Normal Cond	Geosymbio	same_as_EU812743		DGGE of ITS2 & sequencing	LaJeunesse 2010 JBiogeograph Long-standing environmental conditions isolation and host–symbiont specificity	2007-02-01	2	2007	2	2007	Yes	brooder	hermaphrodite
2684	Pocillopora eydouxi	ITS2	D5	17.5605	NA	Koh Hae	Western Indo-Pacific	Andaman	Andaman Sea Coral Coast	2-6	2	6	7.7456	98.3763	Normal Cond	Geosymbio	same_as_EU812743		DGGE of ITS2 & sequencing	LaJeunesse 2010 JBiogeograph Long-standing environmental conditions isolation and host–symbiont specificity	2007-02-01	2	2007	2	2007	Yes	spawner	hermaphrodite
9244	Pocillopora meandrina	ITS2	D5	17.5605	NA	Ko Phi Phi Don	Western Indo-Pacific	Andaman	Andaman Sea Coral Coast	2-6	2	6	7.7333	98.7667	Normal Cond	Geosymbio			DGGE of ITS2 & sequencing	LaJeunesse 2010 JBiogeograph Long-standing environmental conditions isolation and host–symbiont specificity	2007-02-01	2	2007	2	2007	Yes	spawner	hermaphrodite
9176	Pocillopora verrucosa	ITS2	D5	17.5605	NA	Cape Panwa	Western Indo-Pacific	Andaman	Andaman Sea Coral Coast	0-5	0	5	7.8073	98.4092	Normal Cond	Geosymbio			DGGE of ITS2 & sequencing	LaJeunesse 2010 JBiogeograph Long-standing environmental conditions isolation and host–symbiont specificity	2007-02-01	2	2007	2	2007	Yes	spawner	hermaphrodite
4038	Stylophora pistillata	ITS2	C79	17.78	NA	Harry’s Bommie	Central Indo-Pacific	East Central Australian Shelf	Tweed-Moreton	9-11	9	11	-23.6236	152.127	Normal	SymbioGBR			DGGE of ITS2 & sequencing	Sampayo 2007 MolEcol Niche partitioning of closely related symbiotic dinoflagellates		10	2004	10	2005	Yes	brooder	hermaphrodite
5424	Pocillopora damicornis	ITS2	C42a-b	18.5154	NA	Heron Reef, GBR	Central Indo-Pacific	Northeast Australian Shelf	Central and Southern GBR	Intertidal flat	0	1	-23.4167	151.917	Normal Cond	Aquarist		Clsu12 converts to ITS2 C42ab	SSCP of LUS & cloning, DGGE of ITS2 & sequencing	Stat 2008 CoralReefs Symbiont acquisition strategy drives the genetic diversity of Symbiodinium in hosts	2001-08-01	8	2001	8	2001	Yes	brooder	hermaphrodite
14237	Pocillopora capitata	ITS2	C1b-c	19.1083	NA	La Paz, Mexico	Temperate Northern Pacific	Warm Temperate Northeast Pacific	Cortezian	1-6	1	6	24.3543	-110.285	Normal Cond	Original pub			DGGE of ITS2 & sequencing	LaJeunesse 2008 LimnoOceano Specificity and stability in high latitude eastern Pacific coral–algal symbioses		5	2004	5	2006	Yes	spawner	hermaphrodite
14249	Pocillopora damicornis	ITS2	C1b-c	19.1083	NA	La Paz, Mexico	Temperate Northern Pacific	Warm Temperate Northeast Pacific	Cortezian	1-6	1	6	24.3543	-110.285	Normal Cond	Original pub			DGGE of ITS2 & sequencing	LaJeunesse 2008 LimnoOceano Specificity and stability in high latitude eastern Pacific coral–algal symbioses		5	2004	5	2006	Yes	brooder	hermaphrodite
14295	Pocillopora meandrina	ITS2	C1b-c	19.1083	NA	La Paz, Mexico	Temperate Northern Pacific	Warm Temperate Northeast Pacific	Cortezian	1-6	1	6	24.3543	-110.285	Normal Cond	Original pub			DGGE of ITS2 & sequencing	LaJeunesse 2008 LimnoOceano Specificity and stability in high latitude eastern Pacific coral–algal symbioses		5	2004	5	2006	Yes	spawner	hermaphrodite
14128	Pocillopora verrucosa	ITS2	C1b-c	19.1083	NA	La Paz, Mexico	Temperate Northern Pacific	Warm Temperate Northeast Pacific	Cortezian	1-6	1	6	24.3543	-110.285	Normal Cond	Original pub			DGGE of ITS2 & sequencing	LaJeunesse 2008 LimnoOceano Specificity and stability in high latitude eastern Pacific coral–algal symbioses		5	2004	5	2006	Yes	spawner	hermaphrodite
533	Seriatopora hystrix	ITS2	C3n-t	19.8324	NA	Yonge Reef, GBR	Central Indo-Pacific	Northeast Australian Shelf	Torres Strait Northern Great Barrier Reef	27	27	27	-14.6166	145.636	Normal Conditions	SymbioGBR			DGGE of ITS2 & sequencing	Bongaerts 2010 PLoS1 Genetic divergence across habitats in the widespread coral Seriatopora hystrix		2	2008	2	2008	Yes	brooder	hermaphrodite
X18	Orbicella annularis	ITS2	A13	20.2153	NA	Barbados, Caribbean	Tropical Atlantic	Tropical Northwestern Atlantic	Eastern Caribbean	1-5	1	5	13.192	-59.64	Normal Cond	Geosymbio	same_as_AF499789		DGGE of ITS2 & sequencing	LaJeunesse 2009 ProcRSocB Outbreak and persistence of opportunistic Zoox during 2005 Caribbean bleaching		12	2005	4	2006	No	spawner	hermaphrodite
X19	Orbicella faveolata	ITS2	A13	20.2153	NA	Puerto Morelos	Tropical Atlantic	Tropical Northwestern Atlantic	Southern Gulf of Mexico	3-6	3	6	21	-87	Normal Cond	Original pub			DGGE of ITS2 & sequencing	Aschaffenburg 2012 Diss Phsyiological response of Symbiodinium spp		6	2009	6	2009	No	spawner	hermaphrodite
X20	Porites porites	ITS2	A13	20.2153	NA	Puerto Rico, Barbados	Tropical Atlantic	Tropical Northwestern Atlantic		4-20	4	20	NA	NA	Normal Cond	Original pub	NA		NA	LaJeunesse 2009 Do introduced endosymbiotic dinoflagellates 'take' to new hosts?	NA	NA	NA	NA	NA	Yes	brooder	gonochore
9811	Acanthastrea hemprichii	ITS2	C1	21.7249	NA	Orpheus Island, GBR	Central Indo-Pacific	Northeast Australian Shelf	Central and Southern GBR	NA	NA	NA	-18.6061	146.491	Normal Cond	Original pub		ITS1 C1 converted to ITS2 C1	SSCP of ITS1	Abrego 2009 MolEcol Highly infectious symbiont dominates		NA	2003	NA	2006	No	spawner	hermaphrodite
X21	Acropora abrolhosensis	ITS2	C1	21.7249	NA	Zamami Island, Japan	Central Indo-Pacific	South Kuroshio	South Kuroshio	1-10	1	10	26.2346	127.305	Normal Cond	Original pub			DGGE of ITS2 & sequencing	LaJeunesse 2004 MEPS Closely related Symbiodinium spp differ in relative dominance	March (2002)	3	2002	3	2002	No	spawner	hermaphrodite
9626	Acropora cerealis	ITS2	C1	21.7249	NA	Feather Reef GBR	Central Indo-Pacific	Northeast Australian Shelf	Central and Southern Great Barrier Reef	10–17	10	17	-17.5083	146.377	Normal Cond	Riddle 2011			DGGE of ITS2 & sequencing	LaJeunesse 2004 MEPS Closely related Symbiodinium spp differ in relative dominance	May (2003)	5	2003	5	2003	No	spawner	hermaphrodite
5462	Acropora cytherea	ITS2	C1	21.7249	NA	Johnston Atoll, Hawaii	Eastern Indo-Pacific	Hawaii	Hawaii	5-10 m	5	10	18.078	-169.533	Normal Cond	GenBank	AF333515		Cloning of ITS2 & sequencing	Stat 2009 MEPS Specificity in communities of Symbiodinium in corals from Johnston Atoll	June '06	6	2006	6	2006	No	spawner	hermaphrodite
17054	Acropora digitifera	ITS2	C1	21.7249	NA	Port Shelter	Central Indo-Pacific	South China Sea	Southern China	1-5	1	5	22.2	114.167	from SWIMS mesocosm	Original pub	KT983450		Direct sequencing of ITS2	Wong 2016 RegStudMarSci Symbiodinium clade C generality among common scleractinian corals		6	2013	8	2013	No	spawner	hermaphrodite
9632	Acropora divaricata	ITS2	C1	21.7249	NA	Zamami Island, Japan	Central Indo-Pacific	South Kuroshio	South Kuroshio	1-10	1	10	26.2346	127.305	Normal Cond	Riddle 2011			DGGE of ITS2 & sequencing	LaJeunesse 2004 MEPS Closely related Symbiodinium spp differ in relative dominance	March (2002)	5	2003	5	2003	No	spawner	hermaphrodite
X22	Acropora donei	ITS2	C1	21.7249	NA	Zamami Island, Japan	Central Indo-Pacific	South Kuroshio	South Kuroshio	1-10	1	10	26.2346	127.305	Normal Cond	Original pub			DGGE of ITS2 & sequencing	LaJeunesse 2004 MEPS Closely related Symbiodinium spp differ in relative dominance	March (2002)	3	2002	3	2002	No	spawner	hermaphrodite
9450	Acropora florida	ITS2	C1	21.7249	NA	Trunk Reef, GBR	Central Indo-Pacific	Northeast Australian Shelf	Central and Southern GBR	NA	NA	NA	-18.3498	146.827	Normal Cond	Original pub		ITS1, C1	SSCP of ITS1	van Oppen 2001 ProcRSocB Patterns of coral–dinoflagellate associations in Acropora	1905-06-20	NA	1998	NA	1998	No	spawner	hermaphrodite
16683	Acropora humilis	ITS2	C1	21.7249	NA	French Frigate Shoals	Eastern Indo-Pacific	Hawaii	Hawaii	10-20'	10	20	23.7592	-164.807	Normal Conditions	Original pub			Cloning of ITS2 & sequencing	Stat 2015 CoralReefs Geographic structure and host specificity	2005-2009	NA	2005	NA	2009	No	spawner	hermaphrodite
17263	Acropora hyacinthus	ITS2	C1	21.7249	NA	Moorea	Eastern Indo-Pacific	Central Polynesia	Society Islands	1	1	1	-17.4772	-149.802	Normal Conditions	Original Pub	HE578979	LG2	Cloning of ITS2 & sequencing	Putnam 2012 ProcRSocB Endosymbiotic flexibility associates with environ sensitivity	<6-2012	NA	NA	NA	NA	No	spawner	hermaphrodite
9465	Acropora longicyathus	ITS2	C1	21.7249	NA	Trunk Reef, GBR	Central Indo-Pacific	Northeast Australian Shelf	Central and Southern GBR	NA	NA	NA	-18.3498	146.827	Normal Cond	Original pub		ITS1, C1	SSCP of ITS1	van Oppen 2001 ProcRSocB Patterns of coral–dinoflagellate associations in Acropora	1905-06-20	NA	1998	NA	1998	No	spawner	hermaphrodite
7476	Acropora millepora	ITS2	C1	21.7249	NA	Pioneer Bay, Orpheus Island, GBR	Central Indo-Pacific	Northeast Australian Shelf	Central and Southern GBR	NA	NA	NA	-18.597	146.491	Normal Cond	Original pub		ITS1, C1	SSCP of ITS1	van Oppen 2001 ProcRSocB Patterns of coral–dinoflagellate associations in Acropora	1905-06-22	NA	2000	NA	2000	No	spawner	hermaphrodite
16566	Acropora muricata	ITS2	C1	21.7249	NA	Chagos Archipelago	Western Indo-Pacific	Central Indian Ocean Islands	Chagos	2-7m	2	7	-6	72	Normal Cond	Direct from Publication			DGGE of ITS2 & sequencing	Yang 2012 PLoSOne Diversity and Distribution of Symbiodinium Associated		3	2006	3	2006	NA	spawner	hermaphrodite
14359	Acropora nasuta	ITS2	C1	21.7249	NA	Johnston Atoll, Hawaii	Eastern Indo-Pacific	Hawaii	Hawaii	15-20 m	15	20	18.078	-169.533	Normal Cond	GenBank	AF333515		Cloning of ITS2 & sequencing	Stat 2009 MEPS Specificity in communities of Symbiodinium in corals from Johnston Atoll	June '06	6	2006	6	2006	No	spawner	hermaphrodite
9656	Acropora robusta	ITS2	C1	21.7249	NA	Feather Reef GBR	Central Indo-Pacific	Northeast Australian Shelf	Central and Southern Great Barrier Reef	1–8	1	8	-18	146	Normal Cond	Riddle 2011			DGGE of ITS2 & sequencing	LaJeunesse 2004 MEPS Closely related Symbiodinium spp differ in relative dominance	May (2003)	5	2003	5	2003	No	spawner	hermaphrodite
9499	Acropora sarmentosa	ITS2	C1	21.7249	NA	Trunk Reef, GBR	Central Indo-Pacific	Northeast Australian Shelf	Central and Southern GBR	NA	NA	NA	-18.3498	146.827	Normal Cond	Original pub		ITS1, C1	SSCP of ITS1	van Oppen 2001 ProcRSocB Patterns of coral–dinoflagellate associations in Acropora	1905-06-20	NA	1998	NA	1998	No	spawner	hermaphrodite
2978	Acropora secale	ITS2	C1	21.7249	NA	Feather Reef GBR	Central Indo-Pacific	Northeast Australian Shelf	Central and Southern Great Barrier Reef	1–8	1	8	-17.5083	146.377	Normal Cond	Aquarist			DGGE of ITS2 & sequencing	LaJeunesse 2004 MEPS Closely related Symbiodinium spp differ in relative dominance	May (2003)	5	2003	5	2003	No	spawner	hermaphrodite
17055	Acropora solitaryensis	ITS2	C1	21.7249	NA	Port Shelter	Central Indo-Pacific	South China Sea	Southern China	2-4	2	4	22.2	114.167	from SWIMS mesocosm	Original pub	KT862847		Direct sequencing of ITS2	Wong 2016 RegStudMarSci Symbiodinium clade C generality among common scleractinian corals		6	2013	8	2013	No	spawner	hermaphrodite
X23	Acropora striata	ITS2	C1	21.7249	NA	Moorea	Eastern Indo-Pacific	Central Polynesia	Society Islands	9	9	9	-17.4772	-149.802	Normal Conditions	Original Pub		FR1	Cloning of ITS2 & sequencing	Putnam 2012 ProcRSocB Endosymbiotic flexibility associates with environ sensitivity	<6-2012	NA	NA	NA	NA	No	spawner	hermaphrodite
9668	Acropora tenuis	ITS2	C1	21.7249	NA	Feather Reef GBR	Central Indo-Pacific	Northeast Australian Shelf	Central and Southern Great Barrier Reef	1–17	1	17	-17.5083	146.377	Normal Cond	Riddle 2011			DGGE of ITS2 & sequencing	LaJeunesse 2004 MEPS Closely related Symbiodinium spp differ in relative dominance	May (2003)	5	2003	5	2003	No	spawner	hermaphrodite
17271	Acropora valida	ITS2	C1	21.7249	NA	Moorea	Eastern Indo-Pacific	Central Polynesia	Society Islands	6	6	6	-17.5146	-149.762	Normal Conditions	Original Pub	HE578979	FR3	Cloning of ITS2 & sequencing	Putnam 2012 ProcRSocB Endosymbiotic flexibility associates with environ sensitivity	<6-2012	NA	NA	NA	NA	No	spawner	hermaphrodite
X24	Acropora verweyi	ITS2	C1	21.7249	NA	Zamami Island, Japan	Central Indo-Pacific	South Kuroshio	South Kuroshio	1-10	1	10	26.2346	127.305	Normal Cond	Original pub			DGGE of ITS2 & sequencing	LaJeunesse 2004 MEPS Closely related Symbiodinium spp differ in relative dominance	March (2002)	3	2002	3	2002	No	spawner	hermaphrodite
X25	Agaricia humilis	ITS2	C1	21.7249	NA	Puerto Morelos, Yucatan, Mexico	Tropical Atlantic	Tropical Northwestern Atlantic	Southern Gulf of Mexico	4	4	4	21	-87	Normal Cond	Original pub			DGGE of ITS2 & sequencing	LaJeunesse 2002 MarBiol Diversity and community structure of symbiotic dinoflagellates	Aug 1998, Sep 1999	8	1998	9	1999	Yes	brooder	gonochore
11016	Agaricia lamarcki	ITS2	C1	21.7249	25m-Alam-13	Curaçao	Tropical Atlantic	Tropical Northwestern Atlantic	Southern Caribbean	25	25	25	12.1252	-68.9742	Normal Conditions	Original publication		Collected from Bongaerts 2015 RoySocOpenSci	DGGE of ITS2 & sequencing	Bongaerts 2013 BMCEvolBiol Sharing the slope depth partitioning of agariciid corals		NA	2009	NA	2009	NA	brooder	NA
X26	Alveopora fenestrata	ITS2	C1	21.7249	NA	Rib Reef GBR	Central Indo-Pacific	Northeast Australian Shelf	Central and Southern Great Barrier Reef	1-8	1	8	-18.4781	146.871	Normal Cond	SymbioGBR			DGGE of ITS2 & sequencing	LaJeunesse 2004 MEPS Closely related Symbiodinium spp differ in relative dominance	May (2003)	5	2003	5	2003	NA	spawner	NA
13377	Astrea curta	ITS2	C1	21.7249	NA	Boat Harbour (Lord Howe Island)	Central Indo-Pacific	Lord Howe and Norfolk Islands	Lord Howe and Norfolk Islands	5	5	5	-31.6	-160	Normal Conditions	Direct From Source		Listed as Montastrea curta	DGGE of ITS2 & sequencing	Wicks 2010 CoralReefs Local endemicity and high diversity characterise high-latitudecoral–Symbiodiniumpartnerships		1	2007	1	2007	No	spawner	hermaphrodite
X27	Astreopora gracilis	ITS2	C1	21.7249	NA	Penguin Spit Inner	Eastern Indo-Pacific	Central Polynesia	Line Islands	2-3	2	3	5.87389	-162.105	Normal conditions	Original publication			DGGE of ITS2 & sequencing	Wicks 2012 Host tolerance, not symbiont tolerance, determinesthe distribution of coral species in relation to their environmentat a Central Pacific atoll	2007-06-01	6	2007	6	2007	No	spawner	hermaphrodite
9216	Astreopora myriophthalma	ITS2	C1	21.7249	NA	Bawe	Western Indo-Pacific	Western Indian Ocean	East African Coral Coast	2-6	2	6	-6.15054	39.1315	Normal Cond	Geosymbio			DGGE of ITS2 & sequencing	LaJeunesse 2010 JBiogeograph Long-standing environmental conditions isolation and host–symbiont specificity	2007-04-01	4	2007	4	2007	No	spawner	hermaphrodite
8864	Colpophyllia natans	ITS2	C1	21.7249	1	Puerto Morelos, Yucatan, Mexico	Tropical Atlantic	Tropical Northwestern Atlantic	Southern Gulf of Mexico	4	4	4	21	-87	Normal Cond	Riddle 2011	NA		DGGE of ITS2 & sequencing	LaJeunesse 2002 MarBiol Diversity and community structure of symbiotic dinoflagellates	Aug 1998, Sep 1999	8	1998	9	1999	No	spawner	hermaphrodite
2982	Coscinaraea columna	ITS2	C1	21.7249	NA	Rib Reef GBR	Central Indo-Pacific	Northeast Australian Shelf	Central and Southern Great Barrier Reef	10-17	10	17	-18.4781	146.871	Normal Cond	SymbioGBR			DGGE of ITS2 & sequencing	LaJeunesse 2004 MEPS Closely related Symbiodinium spp differ in relative dominance	May (2003)	5	2003	5	2003	NA	spawner	gonochore
9687	Coscinaraea exesa	ITS2	C1	21.7249	NA	Zamami Island, Japan	Central Indo-Pacific	South Kuroshio	South Kuroshio	1-10	1	10	26.2346	127.305	Normal Cond	Riddle 2011			DGGE of ITS2 & sequencing	LaJeunesse 2004 MEPS Closely related Symbiodinium spp differ in relative dominance	March (2002)	3	2002	3	2002	No	spawner	gonochore
X28	Coscinaraea wellsi	ITS2	C1	21.7249	NA	Oahu	Eastern Indo-Pacific	Hawaii	Hawaii	10-20	10	20	21.4667	-157.983	Normal Cond	Original pub			DGGE of ITS2 & sequencing	LaJeunesse 2004 CoralReefs High diversity and host specificity observed among symbiotic	<10-2003	NA	NA	NA	NA	No	spawner	gonochore
X29	Ctenactis echinata	ITS2	C1	21.7249	NA	Guam	Central Indo-Pacific	Tropical Northwestern Pacific	West Caroline Islands	NA	NA	NA	13.5	144.7	Normal Cond	Original pub			Clone ITS2 & sequencing	Pochon 2010 JPhycol Comparison of endosymbiotic and free-living Symbiodinium diversity in a Hawaiian reef environment	1999-12-12	12	1999	12	1999	No	spawner	gonochore
X30	Cycloseris vaughani	ITS2	C1	21.7249	NA	Oahu	Eastern Indo-Pacific	Hawaii	Hawaii	20	20	20	21.4667	-157.983	Normal Cond	Original pub			DGGE of ITS2 & sequencing	LaJeunesse 2004 CoralReefs High diversity and host specificity observed among symbiotic	<10-2003	NA	NA	NA	NA	NA	NA	NA
9690	Cyphastrea chalcidicum	ITS2	C1	21.7249	NA	Zamami Island, Japan	Central Indo-Pacific	South Kuroshio	South Kuroshio	1-10	1	10	26.2346	127.305	Normal Cond	Riddle 2011			DGGE of ITS2 & sequencing	LaJeunesse 2004 MEPS Closely related Symbiodinium spp differ in relative dominance	March (2002)	3	2002	3	2002	No	spawner	hermaphrodite
9691	Cyphastrea decadia	ITS2	C1	21.7249	NA	Rib Reef GBR	Central Indo-Pacific	Northeast Australian Shelf	Central and Southern Great Barrier Reef	10-17	10	17	-18.4781	146.871	Normal Cond	Riddle 2011			DGGE of ITS2 & sequencing	LaJeunesse 2004 MEPS Closely related Symbiodinium spp differ in relative dominance	May (2003)	5	2003	5	2003	No	spawner	hermaphrodite
X31	Cyphastrea japonica	ITS2	C1	21.7249	NA	Zamami Island, Japan	Central Indo-Pacific	South Kuroshio	South Kuroshio	1-10	1	10	26.2346	127.305	Normal Cond	Original pub			DGGE of ITS2 & sequencing	LaJeunesse 2004 MEPS Closely related Symbiodinium spp differ in relative dominance	March (2002)	3	2002	3	2002	No	spawner	hermaphrodite
2983	Cyphastrea microphthalma	ITS2	C1	21.7249	NA	Feather Reef GBR	Central Indo-Pacific	Northeast Australian Shelf	Central and Southern Great Barrier Reef	10–17	10	17	-17.5083	146.377	Normal Cond	Aquarist			DGGE of ITS2 & sequencing	LaJeunesse 2004 MEPS Closely related Symbiodinium spp differ in relative dominance	May (2003)	5	2003	5	2003	No	spawner	hermaphrodite
16702	Cyphastrea ocellina	ITS2	C1	21.7249	NA	French Frigate Shoals	Eastern Indo-Pacific	Hawaii	Hawaii	10-20'	10	20	23.7592	-164.807	Normal Conditions	Original pub			Cloning of ITS2 & sequencing	Stat 2015 CoralReefs Geographic structure and host specificity	2005-2009	NA	2005	NA	2009	yes	brooder	hermaphrodite
8814	Cyphastrea serailia	ITS2	C1	21.7249	NA	Heron Island	Central Indo-Pacific	Northeast Australian Shelf	Central and Southern GBR	3	3	3	-23	152	Normal Cond	Original pub			DGGE of ITS2 & sequencing	LaJeunesse 2003 LimnolOceanogr Low symbiont diversity in southern Great Barrier Reef	Feb and March 2002	2	2002	3	2002	No	spawner	hermaphrodite
15608	Diploastrea heliopora	ITS2	C1	21.7249	NA	Nosy Bé	Western Indo-Pacific	Western Indian Ocean	Western and Northern Madagascar		1	30	-13.4	48	Normal conditions	Original publication		collected at SCUBA depths	DGGE of ITS2 & sequencing	Boonstra 2011 Diss Latitudinal Patterns in the Distribution of Algal Symbionts		3	2007	3	2007	No	spawner	gonochore
2936	Diploria strigosa	ITS2	C1	21.7249	1	Puerto Morelos, Yucatan, Mexico	Tropical Atlantic	Tropical Northwestern Atlantic	Southern Gulf of Mexico	2.5	2.5	2.5	21	-87	Normal Cond	Aquarist			DGGE of ITS2 & sequencing	LaJeunesse 2002 MarBiol Diversity and community structure of symbiotic dinoflagellates		8	1998	9	1999	No	spawner	hermaphrodite
9934	Dipsastraea maritima	ITS2	C1	21.7249	NA	Orpheus Island, GBR	Central Indo-Pacific	Northeast Australian Shelf	Central and Southern GBR	NA	NA	NA	-18.6061	146.491	Normal Cond	Original pub		ITS1 C1 converted to ITS2 C1	SSCP of ITS1	Abrego 2009 MolEcol Highly infectious symbiont dominates		NA	2003	NA	2006	NA	NA	NA
15959	Dipsastraea matthaii	ITS2	C1	21.7249	NA	Tuléar	Western Indo-Pacific	Western Indian Ocean	Western and Northern Madagascar		1	30	-23.3	43.6	Normal conditions	Original publication		collected at SCUBA depths	DGGE of ITS2 & sequencing	Boonstra 2011 Diss Latitudinal Patterns in the Distribution of Algal Symbionts		11	2009	11	2009	NA	spawner	hermaphrodite
2991	Dipsastraea pallida	ITS2	C1	21.7249	NA	Feather Reef GBR	Central Indo-Pacific	Northeast Australian Shelf	Central and Southern Great Barrier Reef	1-8'	1	8	-18	146	Normal Cond	Aquarist			DGGE of ITS2 & sequencing	LaJeunesse 2004 MEPS Closely related Symbiodinium spp differ in relative dominance	May (2003)	5	2003	5	2003	No	spawner	hermaphrodite
9698	Dipsastraea speciosa	ITS2	C1	21.7249	NA	Curaçao Island	Central Indo-Pacific	Northeast Australian Shelf	Central and Southern Great Barrier Reef	1-6	1	6	-18.67	146.549	Normal Cond	Riddle 2011			DGGE of ITS2 & sequencing	LaJeunesse 2004 MEPS Closely related Symbiodinium spp differ in relative dominance	May (2003)	5	2003	5	2003	NA	spawner	hermaphrodite
9935	Echinophyllia aspera	ITS2	C1	21.7249	NA	Magnetic Island, GBR	Central Indo-Pacific	Northeast Australian Shelf	Central and Southern GBR	NA	NA	NA	-19.1369	146.842	Normal Cond	Original pub		ITS1 C1 converted to ITS2 C1	SSCP of ITS1	Abrego 2009 MolEcol Highly infectious symbiont dominates		NA	2003	NA	2006	No	spawner	hermaphrodite
X32	Echinophyllia echinoporoides	ITS2	C1	21.7249	NA	Rib Reef GBR	Central Indo-Pacific	Northeast Australian Shelf	Central and Southern Great Barrier Reef	10-17'	10	17	-18	147	Normal Cond	Original pub			DGGE of ITS2 & sequencing	LaJeunesse 2004 MEPS Closely related Symbiodinium spp differ in relative dominance	May (2003)	5	2003	5	2003	NA	NA	NA
X33	Echinopora hirsutissima	ITS2	C1	21.7249	NA	Vohemar	Western Indo-Pacific	Western Indian Ocean	Western and Northern Madagascar		1	30	-13.4	50	Normal conditions	Original publication		collected at SCUBA depths	DGGE of ITS2 & sequencing	Boonstra 2011 Diss Latitudinal Patterns in the Distribution of Algal Symbionts		9	2001	9	2001	No	spawner	hermaphrodite
8819	Echinopora lamellosa	ITS2	C1	21.7249	NA	Heron Island	Central Indo-Pacific	Northeast Australian Shelf	Central and Southern GBR	3	3	3	-23	152	Normal Cond	Original pub			DGGE of ITS2 & sequencing	LaJeunesse 2003 LimnolOceanogr Low symbiont diversity in southern Great Barrier Reef	Feb and March 2002	2	2002	3	2002	No	spawner	hermaphrodite
X34	Euphyllia divisa	ITS2	C1	21.7249	NA	Rib Reef GBR	Central Indo-Pacific	Northeast Australian Shelf	Central and Southern Great Barrier Reef	10-17	10	17	-18.4781	146.871	Normal Cond	Original pub			DGGE of ITS2 & sequencing	LaJeunesse 2004 MEPS Closely related Symbiodinium spp differ in relative dominance	May (2003)	5	2003	5	2003	No	spawner	NA
8872	Eusmilia fastigiata	ITS2	C1	21.7249	1	Puerto Morelos, Yucatan, Mexico	Tropical Atlantic	Tropical Northwestern Atlantic	Southern Gulf of Mexico	12	12	12	21	-87	Normal Cond	Riddle 2011	NA		DGGE of ITS2 & sequencing	LaJeunesse 2002 MarBiol Diversity and community structure of symbiotic dinoflagellates	Aug 1998, Sep 1999	8	1998	9	1999	No	spawner	gonochore
2938	Favia fragum	ITS2	C1	21.7249	1	Puerto Morelos, Yucatan, Mexico	Tropical Atlantic	Tropical Northwestern Atlantic	Southern Gulf of Mexico	1.5	1.5	1.5	21	-87	Normal Cond	Aquarist			DGGE of ITS2 & sequencing	LaJeunesse 2002 MarBiol Diversity and community structure of symbiotic dinoflagellates		8	1998	9	1999	Yes	brooder	hermaphrodite
13374	Favites abdita	ITS2	C1	21.7249	NA	The Arch (Lord Howe Island)	Central Indo-Pacific	Lord Howe and Norfolk Islands	Lord Howe and Norfolk Islands	5	5	5	-31.5331	-159.504	Normal Conditions	Direct From Source			DGGE of ITS2 & sequencing	Wicks 2010 CoralReefs Local endemicity and high diversity characterise high-latitudecoral–Symbiodiniumpartnerships		1	2007	1	2007	No	spawner	hermaphrodite
9943	Favites complanata	ITS2	C1	21.7249	NA	Magnetic Island, GBR	Central Indo-Pacific	Northeast Australian Shelf	Central and Southern GBR	NA	NA	NA	-19.1369	146.842	Normal Cond	Original pub		ITS1 C1 converted to ITS2 C1	SSCP of ITS1	Abrego 2009 MolEcol Highly infectious symbiont dominates		NA	2003	NA	2006	No	spawner	hermaphrodite
9945	Favites flexuosa	ITS2	C1	21.7249	NA	Magnetic Island, GBR	Central Indo-Pacific	Northeast Australian Shelf	Central and Southern GBR	NA	NA	NA	-19.1369	146.842	Normal Cond	Original pub		ITS1 C1 converted to ITS2 C1	SSCP of ITS1	Abrego 2009 MolEcol Highly infectious symbiont dominates		NA	2003	NA	2006	No	spawner	hermaphrodite
9947	Favites russelli	ITS2	C1	21.7249	NA	Magnetic Island, GBR	Central Indo-Pacific	Northeast Australian Shelf	Central and Southern GBR	NA	NA	NA	-19.1369	146.842	Normal Cond	Original pub		ITS1 C1 converted to ITS2 C1	SSCP of ITS1	Abrego 2009 MolEcol Highly infectious symbiont dominates		NA	2003	NA	2006	No	spawner	hermaphrodite
2998	Fungia fungites	ITS2	C1	21.7249	NA	Rib Reef GBR	Central Indo-Pacific	Northeast Australian Shelf	Central and Southern Great Barrier Reef	10-17'	10	17	-18	147	Normal Cond	Aquarist			DGGE of ITS2 & sequencing	LaJeunesse 2004 MEPS Closely related Symbiodinium spp differ in relative dominance	May (2003)	5	2003	5	2003	No	spawner	gonochore
8824	Galaxea astreata	ITS2	C1	21.7249	NA	Heron Island	Central Indo-Pacific	Northeast Australian Shelf	Central and Southern GBR	10	10	10	-23	152	Normal Cond	Original pub			DGGE of ITS2 & sequencing	LaJeunesse 2003 LimnolOceanogr Low symbiont diversity in southern Great Barrier Reef	Feb and March 2002	2	2002	3	2002	No	spawner	Mixed
3000	Galaxea fascicularis	ITS2	C1	21.7249	NA	Feather Reef GBR	Central Indo-Pacific	Northeast Australian Shelf	Central and Southern Great Barrier Reef	1-8'	1	8	-18	146	Normal Cond	Aquarist			DGGE of ITS2 & sequencing	LaJeunesse 2004 MEPS Closely related Symbiodinium spp differ in relative dominance	May (2003)	5	2003	5	2003	No	spawner	gonochore
17330	Gardineroseris planulata	ITS2	C1	21.7249	NA	Moorea	Eastern Indo-Pacific	Central Polynesia	Society Islands	1	1	1	-17.5209	-149.921	Normal Conditions	Original Pub	HE578979	LG6	Cloning of ITS2 & sequencing	Putnam 2012 ProcRSocB Endosymbiotic flexibility associates with environ sensitivity	<6-2012	NA	NA	NA	NA	no	spawner	gonochore
9715	Goniastrea australensis	ITS2	C1	21.7249	NA	Rib Reef GBR	Central Indo-Pacific	Northeast Australian Shelf	Central and Southern Great Barrier Reef	10-17'	10	17	-18	147	Normal Cond	Riddle 2011			DGGE of ITS2 & sequencing	LaJeunesse 2004 MEPS Closely related Symbiodinium spp differ in relative dominance	May (2003)	5	2003	5	2003	No	spawner	hermaphrodite
9717	Goniastrea pectinata	ITS2	C1	21.7249	NA	Feather Reef GBR	Central Indo-Pacific	Northeast Australian Shelf	Central and Southern Great Barrier Reef	1-8'	1	8	-18	146	Normal Cond	Riddle 2011			DGGE of ITS2 & sequencing	LaJeunesse 2004 MEPS Closely related Symbiodinium spp differ in relative dominance	May (2003)	5	2003	5	2003	No	spawner	hermaphrodite
15893	Goniastrea retiformis	ITS2	C1	21.7249	NA	Tuléar	Western Indo-Pacific	Western Indian Ocean	Western and Northern Madagascar		1	30	-23.3	43.6	Normal conditions	Original publication		collected at SCUBA depths	DGGE of ITS2 & sequencing	Boonstra 2011 Diss Latitudinal Patterns in the Distribution of Algal Symbionts		3	2007	3	2007	No	spawner	hermaphrodite
17176	Goniopora columna	ITS2	C1	21.7249	NA	Port Shelter	Central Indo-Pacific	South China Sea	Southern China	2-4	2	4	22.2	114.167	Normal Cond	Original pub	KT862849		Direct sequencing of ITS2	Wong 2016 RegStudMarSci Symbiodinium clade C generality among common scleractinian corals		6	2013	8	2013	No	spawner	gonochore
9723	Goniopora djiboutiensis	ITS2	C1	21.7249	NA	Rib Reef GBR	Central Indo-Pacific	Northeast Australian Shelf	Central and Southern Great Barrier Reef	1-8	1	8	-18	147	Normal Cond	Riddle 2011			DGGE of ITS2 & sequencing	LaJeunesse 2004 MEPS Closely related Symbiodinium spp differ in relative dominance	May (2003)	5	2003	5	2003	No	spawner	gonochore
9957	Goniopora lobata	ITS2	C1	21.7249	NA	Orpheus Island, GBR	Central Indo-Pacific	Northeast Australian Shelf	Central and Southern GBR	NA	NA	NA	-18.6061	146.491	Normal Cond	Original pub		ITS1 C1 converted to ITS2 C1	SSCP of ITS1	Abrego 2009 MolEcol Highly infectious symbiont dominates		NA	2003	NA	2006	No	spawner	gonochore
X35	Goniopora minor	ITS2	C1	21.7249	NA	Feather Reef GBR	Central Indo-Pacific	Northeast Australian Shelf	Central and Southern Great Barrier Reef	10–17	10	17	-17.5083	146.377	Normal Cond	Riddle 2011			DGGE of ITS2 & sequencing	LaJeunesse 2004 MEPS Closely related Symbiodinium spp differ in relative dominance	May (2003)	5	2003	5	2003	NA	spawner	gonochore
9724	Goniopora pedunculata	ITS2	C1	21.7249	NA	Feather Reef GBR	Central Indo-Pacific	Northeast Australian Shelf	Central and Southern Great Barrier Reef	10–17	10	17	-17.5083	146.377	Normal Cond	Riddle 2011			DGGE of ITS2 & sequencing	LaJeunesse 2004 MEPS Closely related Symbiodinium spp differ in relative dominance	May (2003)	5	2003	5	2003	No	spawner	gonochore
X36	Goniopora planulata	ITS2	C1	21.7249	NA	Luhuitou Bay	Central Indo-Pacific	South China Sea	Gulf of Tonkin	1-10 m	1	10	18.2217	109.495	Normal conditions	Original pub			DGGE of ITS2 & sequencing	Zhou 2011 JSysEvol Low genetic diversity of symbiotic dinoflagellates	Oct '08	10	2008	10	2008	No	spawner	gonochore
9725	Goniopora tenuidens	ITS2	C1	21.7249	NA	Rib Reef GBR	Central Indo-Pacific	Northeast Australian Shelf	Central and Southern Great Barrier Reef	1-8	1	8	-18	147	Normal Cond	Riddle 2011			DGGE of ITS2 & sequencing	LaJeunesse 2004 MEPS Closely related Symbiodinium spp differ in relative dominance	May (2003)	5	2003	5	2003	No	spawner	gonochore
17361	Herpolitha limax	ITS2	C1	21.7249	NA	Moorea	Eastern Indo-Pacific	Central Polynesia	Society Islands	8	8	8	-17.475	-149.837	Normal Conditions	Original Pub	HE578979	FR1	Cloning of ITS2 & sequencing	Putnam 2012 ProcRSocB Endosymbiotic flexibility associates with environ sensitivity	<6-2012	NA	NA	NA	NA	no	spawner	gonochore
X37	Homophyllia australis	ITS2	C1	21.7249	NA	Feather Reef GBR	Central Indo-Pacific	Northeast Australian Shelf	Central and Southern Great Barrier Reef	10–17	10	17	-17.5083	146.377	Normal Cond	Original pub			DGGE of ITS2 & sequencing	LaJeunesse 2004 MEPS Closely related Symbiodinium spp differ in relative dominance	May (2003)	5	2003	5	2003	NA	NA	NA
9964	Hydnophora exesa	ITS2	C1	21.7249	NA	Magnetic Island, GBR	Central Indo-Pacific	Northeast Australian Shelf	Central and Southern GBR	NA	NA	NA	-19.1369	146.842	Normal Cond	Original pub		ITS1 C1 converted to ITS2 C1	SSCP of ITS1	Abrego 2009 MolEcol Highly infectious symbiont dominates		NA	2003	NA	2006	No	spawner	hermaphrodite
3013	Hydnophora rigida	ITS2	C1	21.7249	NA	Zamami Island, Japan	Central Indo-Pacific	South Kuroshio	South Kuroshio	1-10	1	10	26.2346	127.305	Normal Cond	Aquarist			DGGE of ITS2 & sequencing	LaJeunesse 2004 MEPS Closely related Symbiodinium spp differ in relative dominance	March (2002)	3	2002	3	2002	No	spawner	hermaphrodite
7670	Isopora palifera	ITS2	C1	21.7249	NA	Chagos Archipelago	Western Indo-Pacific	Central Indian Ocean Islands	Chagos	2-7m	2	7	-6	72	Normal Cond	Direct from Publication		Listed as Isopera palifera	DGGE of ITS2 & sequencing	Yang 2012 PLoSOne Diversity and Distribution of Symbiodinium Associated		3	2006	3	2006	No	brooder	hermaphrodite
9730	Leptastrea pruinosa	ITS2	C1	21.7249	NA	Rib Reef GBR	Central Indo-Pacific	Northeast Australian Shelf	Central and Southern Great Barrier Reef	1-8	1	8	-18.4781	146.871	Normal Cond	Riddle 2011			DGGE of ITS2 & sequencing	LaJeunesse 2004 MEPS Closely related Symbiodinium spp differ in relative dominance	May (2003)	5	2003	5	2003	No	spawner	gonochore
9732	Leptastrea purpurea	ITS2	C1	21.7249	NA	Feather Reef GBR	Central Indo-Pacific	Northeast Australian Shelf	Central and Southern Great Barrier Reef	1–18	1	18	-17.5083	146.377	Normal Cond	Riddle 2011			DGGE of ITS2 & sequencing	LaJeunesse 2004 MEPS Closely related Symbiodinium spp differ in relative dominance	May (2003)	5	2003	5	2003	No	spawner	gonochore
17387	Leptastrea transversa	ITS2	C1	21.7249	NA	Moorea	Eastern Indo-Pacific	Central Polynesia	Society Islands	2	2	2	-17.485	-149.834	Normal Conditions	Original Pub	HE578979	FG1	Cloning of ITS2 & sequencing	Putnam 2012 ProcRSocB Endosymbiotic flexibility associates with environ sensitivity	<6-2012	NA	NA	NA	NA	NA	spawner	gonochore
9968	Leptoria phrygia	ITS2	C1	21.7249	NA	Orpheus Island, GBR	Central Indo-Pacific	Northeast Australian Shelf	Central and Southern GBR	NA	NA	NA	-18.6061	146.491	Normal Cond	Original pub		ITS1 C1 converted to ITS2 C1	SSCP of ITS1	Abrego 2009 MolEcol Highly infectious symbiont dominates		NA	2003	NA	2006	No	spawner	hermaphrodite
X38	Leptoseris hawaiiensis	ITS2	C1	21.7249	NA	Ribbon Reefs	Central Indo-Pacific	Northeast Australian Shelf	Torres Strait Northern Great Barrier Reef		46	70	-15.63	145.8	Normal Cond	Original pub			DGGE of ITS2 & sequencing	Bongaerts 2011 MEPS Symbiodinium diversity in mesophotic coral community	Sept-Oct 2007	9	2007	10	2007	No	spawner	gonochore
X39	Leptoseris amitoriensis	ITS2	C1	21.7249	NA	Al Fahal Reef	Western Indo-Pacific	Red Sea and Gulf of Aden	Northern and Central Red Sea	60	60	60	22.3	38.96	Normal	Original Publication			DGGE of ITS2 & sequencing	Ziegler 2015 FrontMarSci Mesophotic coral depth acclimatization is a function	2016-09-12	9	2012	9	2012	No	spawner	gonochore
X40	Leptoseris foliosa	ITS2	C1	21.7249	NA	Al Fahal Reef	Western Indo-Pacific	Red Sea and Gulf of Aden	Northern and Central Red Sea	60	60	60	22.3	38.96	Normal	Original Publication			DGGE of ITS2 & sequencing	Ziegler 2015 FrontMarSci Mesophotic coral depth acclimatization is a function	2016-09-12	9	2012	9	2012	No	spawner	gonochore
X41	Leptoseris incrustans	ITS2	C1	21.7249	NA	Oahu	Eastern Indo-Pacific	Hawaii	Hawaii	10-20	10	20	21.4667	-157.983	Normal Cond	Original pub		Article does not say where each sample was from, but all sites (Kaneohe Bay, Haleiwa Trench, and Wailua Bay) are off the island of Oahu	DGGE of ITS2 & sequencing	LaJeunesse 2004 CoralReefs High diversity and host specificity observed among symbiotic	<10-2003	NA	NA	NA	NA	No	spawner	gonochore
X42	Leptoseris mycetoseroides	ITS2	C1	21.7249	NA	Moorea	Eastern Indo-Pacific	Central Polynesia	Society Islands	8	8	8	-17.485	-149.834	Normal Conditions	Original Pub		FG4	Cloning of ITS2 & sequencing	Putnam 2012 ProcRSocB Endosymbiotic flexibility associates with environ sensitivity	<6-2012	NA	NA	NA	NA	NA	NA	NA
17184	Leptoseris papyracea	ITS2	C1	21.7249	NA	Au'au Channel between Maui and Lana'i	Eastern Indo-Pacific	Hawaii	Hawaii	87	87	87	20.9495	156.752	Normal Cond	Original pub		Converted from COI	Direct sequencing of COI & cloning of ITS2 & sequencing	Pochon 2015 RoySocOpenSci Depth specialization in in mesophotic corals	2010-01-17	1	2010	1	2010	No	spawner	gonochore
X43	Leptoseris scabra	ITS2	C1	21.7249	NA	Au'au Channel between Maui and Lana'i	Eastern Indo-Pacific	Hawaii	Hawaii	87	87	87	20.9495	156.752	Normal Cond	Original pub		Converted from COI	Direct sequencing of COI & cloning of ITS2 & sequencing	Pochon 2015 RoySocOpenSci Depth specialization in in mesophotic corals	2010-01-17	1	2010	1	2010	No	spawner	gonochore
X44	Leptoseris tubulifera	ITS2	C1	21.7249	NA	Au'au Channel between Maui and Lana'i	Eastern Indo-Pacific	Hawaii	Hawaii	87	87	87	20.9495	156.752	Normal Cond	Original pub		Converted from COI	Direct sequencing of COI & cloning of ITS2 & sequencing	Pochon 2015 RoySocOpenSci Depth specialization in in mesophotic corals	2010-01-17	1	2010	1	2010	No	spawner	gonochore
9734	Leptoseris yabei	ITS2	C1	21.7249	NA	Rib Reef GBR	Central Indo-Pacific	Northeast Australian Shelf	Central and Southern Great Barrier Reef	1-8	1	8	-18.4781	146.871	Normal Cond	Riddle 2011			DGGE of ITS2 & sequencing	LaJeunesse 2004 MEPS Closely related Symbiodinium spp differ in relative dominance	May (2003)	5	2003	5	2003	No	spawner	gonochore
17289	Lithophyllon concinna	ITS2	C1	21.7249	NA	Moorea	Eastern Indo-Pacific	Central Polynesia	Society Islands	4	4	4	-17.485	-149.834	Normal Conditions	Original Pub		FG2	Cloning of ITS2 & sequencing	Putnam 2012 ProcRSocB Endosymbiotic flexibility associates with environ sensitivity	<6-2012	NA	NA	NA	NA	no	spawner	gonochore
X45	Lithophyllon undulatum	ITS2	C1	21.7249	NA	Port Shelter	Central Indo-Pacific	South China Sea	Southern China	3-5	3	5	22.2	114.167	Normal Conditions	Original pub			Direct sequencing of ITS2	Wong 2016 RegStudMarSci Symbiodinium clade C generality among common scleractinian corals		6	2013	8	2013	No	spawner	gonochore
9736	Lobactis scutaria	ITS2	C1	21.7249	NA	Zamami Island, Japan	Central Indo-Pacific	South Kuroshio	South Kuroshio	1-10	1	10	26.2346	127.305	Normal Cond	Riddle 2011			DGGE of ITS2 & sequencing	LaJeunesse 2004 MEPS Closely related Symbiodinium spp differ in relative dominance	March (2002)	3	2002	3	2002	no	spawner	gonochore
9969	Lobophyllia hemprichii	ITS2	C1	21.7249	NA	Magnetic Island, GBR	Central Indo-Pacific	Northeast Australian Shelf	Central and Southern GBR	NA	NA	NA	-19.1369	146.842	Normal Cond	Original pub		ITS1 C1 converted to ITS2 C1	SSCP of ITS1	Abrego 2009 MolEcol Highly infectious symbiont dominates		NA	2003	NA	2006	No	spawner	hermaphrodite
8879	Manicina areolata	ITS2	C1	21.7249	1	Puerto Morelos, Yucatan, Mexico	Tropical Atlantic	Tropical Northwestern Atlantic	Southern Gulf of Mexico	2.5	2.5	2.5	21	-87	Normal Cond	Riddle 2011	NA		DGGE of ITS2 & sequencing	LaJeunesse 2002 MarBiol Diversity and community structure of symbiotic dinoflagellates	Aug 1998, Sep 1999	8	1998	9	1999	yes	brooder	hermaphrodite
9739	Merulina ampliata	ITS2	C1	21.7249	NA	Feather Reef GBR	Central Indo-Pacific	Northeast Australian Shelf	Central and Southern Great Barrier Reef	1-8'	1	8	-18	146	Normal Cond	Riddle 2011			DGGE of ITS2 & sequencing	LaJeunesse 2004 MEPS Closely related Symbiodinium spp differ in relative dominance	May (2003)	5	2003	5	2003	No	spawner	hermaphrodite
3021	Merulina scabricula	ITS2	C1	21.7249	NA	Curaçao Island	Central Indo-Pacific	Northeast Australian Shelf	Central and Southern Great Barrier Reef	1-6	1	6	-18.67	146.549	Normal Cond	Aquarist			DGGE of ITS2 & sequencing	LaJeunesse 2004 MEPS Closely related Symbiodinium spp differ in relative dominance	May (2003)	5	2003	5	2003	No	spawner	hermaphrodite
16887	Montipora capitata	ITS2	C1	21.7249	NA	Laysan	Eastern Indo-Pacific	Hawaii	Hawaii	10-20'	10	20	25.9	-172	Normal Conditions	Original pub			Cloning of ITS2 & sequencing	Stat 2015 CoralReefs Geographic structure and host specificity	2005-2009	NA	2005	NA	2009	Yes	spawner	hermaphrodite
9980	Montipora danae	ITS2	C1	21.7249	NA	Orpheus Island, GBR	Central Indo-Pacific	Northeast Australian Shelf	Central and Southern GBR	NA	NA	NA	-18.6061	146.491	Normal Cond	Original pub		ITS1 C1 converted to ITS2 C1	SSCP of ITS1	Abrego 2009 MolEcol Highly infectious symbiont dominates		NA	2003	NA	2006	Yes	spawner	hermaphrodite
9981	Montipora peltiformis	ITS2	C1	21.7249	NA	Orpheus Island, GBR	Central Indo-Pacific	Northeast Australian Shelf	Central and Southern GBR	NA	NA	NA	-18.6061	146.491	Normal Cond	Original pub		ITS1 C1 converted to ITS2 C1	SSCP of ITS1	Abrego 2009 MolEcol Highly infectious symbiont dominates		NA	2003	NA	2006	Yes	spawner	hermaphrodite
9982	Mycedium elephantotus	ITS2	C1	21.7249	NA	Magnetic Island, GBR	Central Indo-Pacific	Northeast Australian Shelf	Central and Southern GBR	NA	NA	NA	-19.1369	146.842	Normal Cond	Original pub		ITS1 C1 converted to ITS2 C1	SSCP of ITS1	Abrego 2009 MolEcol Highly infectious symbiont dominates		NA	2003	NA	2006	No	spawner	hermaphrodite
18924	Orbicella annularis	ITS2	C1	21.7249	NA	Sandy Bay, Honduras	Tropical Atlantic	Tropical Northwestern Atlantic	Western Caribbean		2	6	16.3268	-86.5632	Normal Cond	Original publication			DGGE of ITS2 & sequencing, RT-PCR of LSU	Kennedy 2015 CoralReefs Widespread prevalence of cryptic Symbiodinium D in O annularis	2004-10-01	10	2004	10	2004	No	spawner	hermaphrodite
X46	Orbicella franksi	ITS2	C1	21.7249	NA	USVI	Tropical Atlantic	Tropical Northwestern Atlantic	Eastern Caribbean	NA	NA	NA	18.3	-64.8	Normal Cond	Original publication			DGGE of ITS2 & sequencing, RT-PCR of LSU	Correa 2009 CoralReefs Understanding diversity in coral-algae symbiosis		4	2006	9	2006	No	spawner	hermaphrodite
X47	Oulastrea crispata	ITS2	C1	21.7249	NA	Port Shelter	Central Indo-Pacific	South China Sea	Southern China	2-4	2	4	22.2	114.167	Normal Conditions	Original pub			Direct sequencing of ITS2	Wong 2016 RegStudMarSci Symbiodinium clade C generality among common scleractinian corals		6	2013	8	2013	No	spawner	gonochore
9986	Pachyseris rugosa	ITS2	C1	21.7249	NA	Magnetic Island, GBR	Central Indo-Pacific	Northeast Australian Shelf	Central and Southern GBR	NA	NA	NA	-19.1369	146.842	Normal Cond	Original pub		ITS1 C1 converted to ITS2 C1	SSCP of ITS1	Abrego 2009 MolEcol Highly infectious symbiont dominates		NA	2003	NA	2006	No	spawner	gonochore
17426	Pachyseris speciosa	ITS2	C1	21.7249	NA	Moorea	Eastern Indo-Pacific	Central Polynesia	Society Islands	20	20	20	-17.4828	-149.857	Normal Conditions	Original Pub	HE578979	RG	Cloning of ITS2 & sequencing	Putnam 2012 ProcRSocB Endosymbiotic flexibility associates with environ sensitivity	<6-2012	NA	NA	NA	NA	no	spawner	gonochore
9768	Palauastrea ramosa	ITS2	C1	21.7249	NA	Zamami Island, Japan	Central Indo-Pacific	South Kuroshio	South Kuroshio	1-10	1	10	26.2346	127.305	Normal Cond	Riddle 2011			DGGE of ITS2 & sequencing	LaJeunesse 2004 MEPS Closely related Symbiodinium spp differ in relative dominance	March (2002)	3	2002	3	2002	No	spawner	hermaphrodite
X48	Paramontastraea peresi	ITS2	C1	21.7249	NA	Banda Kuu	Western Indo-Pacific	Western Indian Ocean	East African Coral Coast	3-12	3	12	-5.73012	39.3035	Normal Cond	Original pub			DGGE of ITS2 & sequencing	LaJeunesse 2010 JBiogeograph Long-standing environmental conditions isolation and host–symbiont specificity	2007-04-01	4	2007	4	2007	No	spawner	hermaphrodite
17440	Pavona cactus	ITS2	C1	21.7249	NA	Moorea	Eastern Indo-Pacific	Central Polynesia	Society Islands	3	3	3	-17.579	-149.864	Normal Conditions	Original Pub	HE578979	FG5	Cloning of ITS2 & sequencing	Putnam 2012 ProcRSocB Endosymbiotic flexibility associates with environ sensitivity	<6-2012	NA	NA	NA	NA	No	spawner	gonochore
17101	Pavona decussata	ITS2	C1	21.7249	NA	Port Shelter	Central Indo-Pacific	South China Sea	Southern China	1-3	1	3	22.2	114.167	from SWIMS mesocosm	Original pub	KT862854		Direct sequencing of ITS2	Wong 2016 RegStudMarSci Symbiodinium clade C generality among common scleractinian corals		6	2013	8	2013	No	spawner	gonochore
16736	Pavona duerdeni	ITS2	C1	21.7249	No	French Frigate Shoals	Eastern Indo-Pacific	Hawaii	Hawaii	0-10'	0	10	23.7592	-164.807	Normal Conditions	Original pub			Cloning of ITS2 & sequencing	Stat 2015 CoralReefs Geographic structure and host specificity	2005-2009	NA	2005	NA	2009	NA	spawner	gonochore
15796	Pavona explanulata	ITS2	C1	21.7249	NA	Tuléar	Western Indo-Pacific	Western Indian Ocean	Western and Northern Madagascar		1	30	-23.3	43.6	Normal conditions	Original publication		collected at SCUBA depths	DGGE of ITS2 & sequencing	Boonstra 2011 Diss Latitudinal Patterns in the Distribution of Algal Symbionts		9	2001	9	2001	No	spawner	gonochore
15505	Pavona varians	ITS2	C1	21.7249	NA	Nosy Bé	Western Indo-Pacific	Western Indian Ocean	Western and Northern Madagascar		1	30	-13.4	48	Normal conditions	Original publication		collected at SCUBA depths	DGGE of ITS2 & sequencing	Boonstra 2011 Diss Latitudinal Patterns in the Distribution of Algal Symbionts		9	2001	9	2001	No	spawner	gonochore
15952	Pavona venosa	ITS2	C1	21.7249	NA	Tuléar	Western Indo-Pacific	Western Indian Ocean	Western and Northern Madagascar		1	30	-23.3	43.6	Normal conditions	Original publication		collected at SCUBA depths	DGGE of ITS2 & sequencing	Boonstra 2011 Diss Latitudinal Patterns in the Distribution of Algal Symbionts		11	2009	11	2009	No	spawner	gonochore
17133	Platygyra acuta	ITS2	C1	21.7249	NA	Port Shelter	Central Indo-Pacific	South China Sea	Southern China	2-4	2	4	22.2	114.167	Normal Cond	Original pub	KT862851		Direct sequencing of ITS2	Wong 2016 RegStudMarSci Symbiodinium clade C generality among common scleractinian corals		6	2013	8	2013	No	spawner	hermaphrodite
X49	Platygyra carnosa	ITS2	C1	21.7249	NA	Port Shelter	Central Indo-Pacific	South China Sea	Southern China	2-4	2	4	22.2	114.167	Normal Conditions	Original pub			Direct sequencing of ITS2	Wong 2016 RegStudMarSci Symbiodinium clade C generality among common scleractinian corals		6	2013	8	2013	NA	NA	NA
9993	Platygyra daedalea	ITS2	C1	21.7249	NA	Magnetic Island, GBR	Central Indo-Pacific	Northeast Australian Shelf	Central and Southern GBR	NA	NA	NA	-19.1369	146.842	Normal Cond	Original pub		ITS1 C1 converted to ITS2 C1	SSCP of ITS1	Abrego 2009 MolEcol Highly infectious symbiont dominates		NA	2003	NA	2006	No	spawner	hermaphrodite
15817	Platygyra pini	ITS2	C1	21.7249	NA	Tuléar	Western Indo-Pacific	Western Indian Ocean	Western and Northern Madagascar		1	30	-23.3	43.6	Normal conditions	Original publication		collected at SCUBA depths	DGGE of ITS2 & sequencing	Boonstra 2011 Diss Latitudinal Patterns in the Distribution of Algal Symbionts		9	2001	9	2001	No	spawner	hermaphrodite
9779	Plerogyra sinuosa	ITS2	C1	21.7249	NA	Rib Reef GBR	Central Indo-Pacific	Northeast Australian Shelf	Central and Southern Great Barrier Reef	10-17	10	17	-18.4781	146.871	Normal Cond	Riddle 2011			DGGE of ITS2 & sequencing	LaJeunesse 2004 MEPS Closely related Symbiodinium spp differ in relative dominance	May (2003)	5	2003	5	2003	No	spawner	gonochore
9998	Plesiastrea versipora	ITS2	C1	21.7249	NA	Magnetic Island, GBR	Central Indo-Pacific	Northeast Australian Shelf	Central and Southern GBR	NA	NA	NA	-19.1369	146.842	Normal Cond	Original pub		ITS1 C1 converted to ITS2 C1	SSCP of ITS1	Abrego 2009 MolEcol Highly infectious symbiont dominates		NA	2003	NA	2006	No	spawner	gonochore
X50	Pleuractis granulosa	ITS2	C1	21.7249	NA	Rib Reef GBR	Central Indo-Pacific	Northeast Australian Shelf	Central and Southern Great Barrier Reef	1-8	1	8	-18	147	Normal Cond	Original pub			DGGE of ITS2 & sequencing	LaJeunesse 2004 MEPS Closely related Symbiodinium spp differ in relative dominance	May (2003)	5	2003	5	2003	No	spawner	gonochore
17319	Pleuractis paumotensis	ITS2	C1	21.7249	NA	Moorea	Eastern Indo-Pacific	Central Polynesia	Society Islands	1	1	1	-17.4772	-149.802	Normal Conditions	Original Pub		LG2	Cloning of ITS2 & sequencing	Putnam 2012 ProcRSocB Endosymbiotic flexibility associates with environ sensitivity	<6-2012	NA	NA	NA	NA	NA	spawner	gonochore
16613	Pocillopora damicornis	ITS2	C1	21.7249	NA	Chagos Archipelago	Western Indo-Pacific	Central Indian Ocean Islands	Chagos	2-7m	2	7	-6	72	Normal Cond	Direct from Publication			DGGE of ITS2 & sequencing	Yang 2012 PLoSOne Diversity and Distribution of Symbiodinium Associated		3	2006	3	2006	Yes	brooder	hermaphrodite
16782	Pocillopora eydouxi	ITS2	C1	21.7249	NA	French Frigate Shoals	Eastern Indo-Pacific	Hawaii	Hawaii	10-20'	10	20	23.8	-165	Normal Conditions	Original pub			Cloning of ITS2 & sequencing	Stat 2015 CoralReefs Geographic structure and host specificity	2005-2009	NA	2005	NA	2009	Yes	spawner	hermaphrodite
17025	Pocillopora meandrina	ITS2	C1	21.7249	NA	Kure	Eastern Indo-Pacific	Hawaii	Hawaii	10-20'	10	20	28.5108	-178.51	Normal Conditions	Original pub			Cloning of ITS2 & sequencing	Stat 2015 CoralReefs Geographic structure and host specificity	2005-2009	NA	2005	NA	2009	Yes	spawner	hermaphrodite
16616	Pocillopora verrucosa	ITS2	C1	21.7249	NA	Chagos Archipelago	Western Indo-Pacific	Central Indian Ocean Islands	Chagos	2-7m	2	7	-6	72	Normal Cond	Direct from Publication			DGGE of ITS2 & sequencing	Yang 2012 PLoSOne Diversity and Distribution of Symbiodinium Associated		3	2006	3	2006	Yes	spawner	hermaphrodite
10005	Podabacia crustacea	ITS2	C1	21.7249	NA	Orpheus Island, GBR	Central Indo-Pacific	Northeast Australian Shelf	Central and Southern GBR	NA	NA	NA	-18.6061	146.491	Normal Cond	Original pub		ITS1 C1 converted to ITS2 C1	SSCP of ITS1	Abrego 2009 MolEcol Highly infectious symbiont dominates		NA	2003	NA	2006	No	spawner	gonochore
X51	Polyphyllia talpina	ITS2	C1	21.7249	NA	Rib Reef GBR	Central Indo-Pacific	Northeast Australian Shelf	Central and Southern Great Barrier Reef	1-8	1	8	-18	147	Normal Cond	Riddle 2011			DGGE of ITS2 & sequencing	LaJeunesse 2004 MEPS Closely related Symbiodinium spp differ in relative dominance	May (2003)	5	2003	5	2003	No	spawner	gonochore
18622	Porites astreoides	ITS2	C1	21.7249	NA	US Virgin Islands	Tropical Atlantic	Tropical Northwestern Atlantic	Eastern Caribbean	25+	25	30	18.464	-65.497	Normal	Original Publication	JQ180021		DGGE of ITS2 & sequencing	Serrano 2016 SciReports Long distance dispersal and vertical gene flow in P astreoides	<10-2015	NA	NA	NA	NA	Yes	brooder	Mixed
8896	Porites divaricata	ITS2	C1	21.7249	NA	Lee Stocking Island, Bahamas	Tropical Atlantic	Tropical Northwestern Atlantic	Bahamian	4	4	4	24	-76	Normal Cond	Riddle 2011	NA		DGGE of ITS2 & sequencing	LaJeunesse 2002 MarBiol Diversity and community structure of symbiotic dinoflagellates	Aug 1998, Sep 1999	8	1998	9	1999	yes	brooder	gonochore
16907	Porites lobata	ITS2	C1	21.7249	NA	Laysan	Eastern Indo-Pacific	Hawaii	Hawaii	10-20'	10	20	25.9	-172	Normal Conditions	Original pub			Cloning of ITS2 & sequencing	Stat 2015 CoralReefs Geographic structure and host specificity	2005-2009	NA	2005	NA	2009	Yes	spawner	gonochore
17573	Porites lutea	ITS2	C1	21.7249	NA	Moorea	Eastern Indo-Pacific	Central Polynesia	Society Islands	20	20	20	-17.475	-149.837	Normal Conditions	Original Pub	HE578979	FR1	Cloning of ITS2 & sequencing	Putnam 2012 ProcRSocB Endosymbiotic flexibility associates with environ sensitivity	<6-2012	NA	NA	NA	NA	Yes	spawner	gonochore
14338	Porites panamensis	ITS2	C1	21.7249	NA	La Paz, Mexico	Temperate Northern Pacific	Warm Temperate Northeast Pacific	Cortezian	.5-14	0.5	14	24.3509	-110.325	Normal Cond	Original pub			DGGE of ITS2 & sequencing	LaJeunesse 2008 LimnoOceano Specificity and stability in high latitude eastern Pacific coral–algal symbioses		5	2004	5	2006	NA	brooder	gonochore
17605	Porites solida	ITS2	C1	21.7249	NA	Moorea	Eastern Indo-Pacific	Central Polynesia	Society Islands	1	1	1	-17.4772	-149.802	Normal Conditions	Original Pub	HE578979	LG2	Cloning of ITS2 & sequencing	Putnam 2012 ProcRSocB Endosymbiotic flexibility associates with environ sensitivity	<6-2012	NA	NA	NA	NA	NA	spawner	gonochore
17631	Psammocora contigua	ITS2	C1	21.7249	NA	Moorea	Eastern Indo-Pacific	Central Polynesia	Society Islands	2	2	2	-17.5209	-149.921	Normal Conditions	Original Pub	HE578979	LG6	Cloning of ITS2 & sequencing	Putnam 2012 ProcRSocB Endosymbiotic flexibility associates with environ sensitivity	<6-2012	NA	NA	NA	NA	Yes	spawner	gonochore
9802	Psammocora digitata	ITS2	C1	21.7249	NA	Rib Reef GBR	Central Indo-Pacific	Northeast Australian Shelf	Central and Southern Great Barrier Reef	10-17'	10	17	-18	147	Normal Cond	Riddle 2011			DGGE of ITS2 & sequencing	LaJeunesse 2004 MEPS Closely related Symbiodinium spp differ in relative dominance	May (2003)	5	2003	5	2003	No	spawner	gonochore
X52	Psammocora profundacella	ITS2	C1	21.7249	NA	Feather Reef GBR	Central Indo-Pacific	Northeast Australian Shelf	Central and Southern Great Barrier Reef	10-17	10	17	-18	146	Normal Cond	Original Pub			DGGE of ITS2 & sequencing	LaJeunesse 2004 MEPS Closely related Symbiodinium spp differ in relative dominance	May (2003)	5	2003	5	2003	No	spawner	NA
17635	Psammocora superficialis	ITS2	C1	21.7249	NA	Moorea	Eastern Indo-Pacific	Central Polynesia	Society Islands	5	5	5	-17.5155	-149.915	Normal Conditions	Original Pub		FG6	Cloning of ITS2 & sequencing	Putnam 2012 ProcRSocB Endosymbiotic flexibility associates with environ sensitivity	<6-2012	NA	NA	NA	NA	NA	spawner	gonochore
9803	Sandalolitha robusta	ITS2	C1	21.7249	NA	Zamami Island, Japan	Central Indo-Pacific	South Kuroshio	South Kuroshio	1-10	1	10	26.2346	127.305	Normal Cond	Riddle 2011			DGGE of ITS2 & sequencing	LaJeunesse 2004 MEPS Closely related Symbiodinium spp differ in relative dominance	March (2002)	3	2002	3	2002	No	spawner	gonochore
7814	Seriatopora hystrix	ITS2	C1	21.7249	NA	Chagos Archipelago	Western Indo-Pacific	Central Indian Ocean Islands	Chagos	2-7m	2	7	-6	72	Normal Cond	Direct from Publication			DGGE of ITS2 & sequencing	Yang 2012 PLoSOne Diversity and Distribution of Symbiodinium Associated		3	2006	3	2006	Yes	brooder	hermaphrodite
12854	Siderastrea siderea	ITS2	C1	21.7249	02m-Ssid-02	Curaçao	Tropical Atlantic	Tropical Northwestern Atlantic	Southern Caribbean	2	2	2	12.1252	-68.9742	Normal Conditions	Original publication			DGGE of ITS2 & sequencing	Bongaerts 2015 RoySocOpenSci Prevalent endosymbiont zoantion		11	2009	11	2009	No	spawner	gonochore
13261	Stephanocoenia intersepta	ITS2	C1	21.7249	60m-Sint-DC5846	Curaçao	Tropical Atlantic	Tropical Northwestern Atlantic	Southern Caribbean	60	60	60	12.1252	-68.9742	Normal Conditions	Original publication			DGGE of ITS2 & sequencing	Bongaerts 2015 RoySocOpenSci Prevalent endosymbiont zoantion		3	2013	4	2013	no	spawner	gonochore
7784	Stylophora pistillata	ITS2	C1	21.7249	NA	Chagos Archipelago	Western Indo-Pacific	Central Indian Ocean Islands	Chagos	2-7m	2	7	-6	72	Normal Cond	Direct from Publication			DGGE of ITS2 & sequencing	Yang 2012 PLoSOne Diversity and Distribution of Symbiodinium Associated		3	2006	3	2006	Yes	brooder	hermaphrodite
X53	Turbinaria frondens	ITS2	C1	21.7249	NA	Kermadec Islands	Temperate Australasia	Northern New Zealand	Kermadec Island	5	5	5	-29.25	177.89	Normal Conditions	Direct From Source			DGGE of ITS2 & sequencing	Wicks 2010 CoralReefs Local endemicity and high diversity characterise high-latitudecoral–Symbiodiniumpartnerships		1	2007	1	2007	No	spawner	gonochore
15135	Turbinaria mesenterina	ITS2	C1	21.7249	NA	Xipai Island	Central Indo-Pacific	South China Sea	Gulf of Tonkin	1-10 m	1	10	18.2157	109.631	Normal conditions	Original pub	AF333515		DGGE of ITS2 & sequencing	Zhou 2011 JSysEvol Low genetic diversity of symbiotic dinoflagellates	Oct '08	10	2008	10	2008	No	spawner	gonochore
17117	Turbinaria peltata	ITS2	C1	21.7249	NA	Port Shelter	Central Indo-Pacific	South China Sea	Southern China	3-5	3	5	22.2	114.167	from SWIMS mesocosm	Original pub	KT862855		Direct sequencing of ITS2	Wong 2016 RegStudMarSci Symbiodinium clade C generality among common scleractinian corals		6	2013	8	2013	No	spawner	gonochore
X54	Turbinaria stellulata	ITS2	C1	21.7249	NA	Rib Reef GBR	Central Indo-Pacific	Northeast Australian Shelf	Central and Southern Great Barrier Reef	1-8	1	8	-18.4781	146.871	Normal Cond	Original publication			DGGE of ITS2 & sequencing	LaJeunesse 2004 MEPS Closely related Symbiodinium spp differ in relative dominance	May (2003)	5	2003	5	2003	No	spawner	gonochore
9192	Porites stephensoni	ITS2	C114	21.9506	NA	Cape Panwa	Western Indo-Pacific	Andaman	Andaman Sea Coral Coast	0-5	0	5	7.8073	98.4092	Normal Cond	Geosymbio			DGGE of ITS2 & sequencing	LaJeunesse 2010 JBiogeograph Long-standing environmental conditions isolation and host–symbiont specificity	2007-02-01	2	2007	2	2007	Yes	brooder	gonochore
9208	Acanthastrea echinata	ITS2	C3u	21.9506	NA	Banda Kuu	Western Indo-Pacific	Western Indian Ocean	East African Coral Coast	3-12	3	12	-5.73012	39.3035	Normal Cond	Geosymbio	GU111879		DGGE of ITS2 & sequencing	LaJeunesse 2010 JBiogeograph Long-standing environmental conditions isolation and host–symbiont specificity	2007-04-01	4	2007	4	2007	No	spawner	hermaphrodite
9209	Acanthastrea hemprichii	ITS2	C3u	21.9506	NA	Banda Kuu	Western Indo-Pacific	Western Indian Ocean	East African Coral Coast	3-12	3	12	-5.73012	39.3035	Normal Cond	Geosymbio	GU111879		DGGE of ITS2 & sequencing	LaJeunesse 2010 JBiogeograph Long-standing environmental conditions isolation and host–symbiont specificity	2007-04-01	4	2007	4	2007	No	spawner	hermaphrodite
2431	Acropora aspera	ITS2	C3u	21.9506	NA	Cape Panwa	Western Indo-Pacific	Andaman	Andaman Sea Coral Coast	0-5	0	5	7.8073	98.4092	Normal Cond	Geosymbio	same_as_GU111879		DGGE of ITS2 & sequencing	LaJeunesse 2010 JBiogeograph Long-standing environmental conditions isolation and host–symbiont specificity	2007-02-01	2	2007	2	2007	No	spawner	hermaphrodite
8921	Acropora austera	ITS2	C3u	21.9506	NA	Ko Phi Phi Leh	Western Indo-Pacific	Andaman	Andaman Sea Coral Coast	6-12	6	12	7.7333	98.7667	Normal Cond	Geosymbio			DGGE of ITS2 & sequencing	LaJeunesse 2010 JBiogeograph Long-standing environmental conditions isolation and host–symbiont specificity	2007-02-01	2	2007	2	2007	No	spawner	hermaphrodite
2440	Acropora digitifera	ITS2	C3u	21.9506	NA	Cape Panwa	Western Indo-Pacific	Andaman	Andaman Sea Coral Coast	0-5	0	5	7.8073	98.4092	Normal Cond	Geosymbio	same_as_GU111879		DGGE of ITS2 & sequencing	LaJeunesse 2010 JBiogeograph Long-standing environmental conditions isolation and host–symbiont specificity	2007-02-01	2	2007	2	2007	No	spawner	hermaphrodite
8148	Acropora gemmifera	ITS2	C3u	21.9506	NA	Tanga	Western Indo-Pacific	Western Indian Ocean	East African Coral Coast		1	7	-5.15382	39.115	Normal Cond	Direct from publication			DGGE of ITS2 & sequencing	Chauka 2012 WIndOceaJMarSci Diversity of Symbiodinium in Tanzania		8	2008	8	2008	No	spawner	hermaphrodite
8150	Acropora glauca	ITS2	C3u	21.9506	NA	Tanga	Western Indo-Pacific	Western Indian Ocean	East African Coral Coast		1	7	-5.15382	39.115	Normal Cond	Direct from publication			DGGE of ITS2 & sequencing	Chauka 2012 WIndOceaJMarSci Diversity of Symbiodinium in Tanzania		8	2008	8	2008	no	spawner	hermaphrodite
X55	Acropora granulosa	ITS2	C3u	21.9506	NA	Tanga	Western Indo-Pacific	Western Indian Ocean	East African Coral Coast		1	7	-5.15382	39.115	Normal Cond	Direct from publication			DGGE of ITS2 & sequencing	Chauka 2012 WIndOceaJMarSci Diversity of Symbiodinium in Tanzania		8	2008	8	2008	No	spawner	hermaphrodite
X56	Acropora hemprichii	ITS2	C3u	21.9506	NA	Tanga	Western Indo-Pacific	Western Indian Ocean	East African Coral Coast		1	7	-5.15382	39.115	Normal Cond	Direct from publication			DGGE of ITS2 & sequencing	Chauka 2012 WIndOceaJMarSci Diversity of Symbiodinium in Tanzania		8	2008	8	2008	No	spawner	hermaphrodite
2448	Acropora humilis	ITS2	C3u	21.9506	NA	Cape Panwa	Western Indo-Pacific	Andaman	Andaman Sea Coral Coast	0-5	0	5	7.8073	98.4092	Normal Cond	Geosymbio	same_as_GU111879		DGGE of ITS2 & sequencing	LaJeunesse 2010 JBiogeograph Long-standing environmental conditions isolation and host–symbiont specificity	2007-02-01	2	2007	2	2007	No	spawner	hermaphrodite
2452	Acropora hyacinthus	ITS2	C3u	21.9506	NA	Cape Panwa	Western Indo-Pacific	Andaman	Andaman Sea Coral Coast	0-5	0	5	7.8073	98.4092	Normal Cond	Geosymbio	same_as_GU111879		DGGE of ITS2 & sequencing	LaJeunesse 2010 JBiogeograph Long-standing environmental conditions isolation and host–symbiont specificity	2007-02-01	2	2007	2	2007	No	spawner	hermaphrodite
8163	Acropora latistella	ITS2	C3u	21.9506	NA	Tanga	Western Indo-Pacific	Western Indian Ocean	East African Coral Coast		1	7	-5.15382	39.115	Normal Cond	Direct from publication			DGGE of ITS2 & sequencing	Chauka 2012 WIndOceaJMarSci Diversity of Symbiodinium in Tanzania		8	2008	8	2008	No	spawner	hermaphrodite
8168	Acropora loripes	ITS2	C3u	21.9506	NA	Tanga	Western Indo-Pacific	Western Indian Ocean	East African Coral Coast		1	7	-5.15382	39.115	Normal Cond	Direct from publication			DGGE of ITS2 & sequencing	Chauka 2012 WIndOceaJMarSci Diversity of Symbiodinium in Tanzania		8	2008	8	2008	No	spawner	hermaphrodite
8177	Acropora lutkeni	ITS2	C3u	21.9506	NA	Tanga	Western Indo-Pacific	Western Indian Ocean	East African Coral Coast		1	7	-5.15382	39.115	Normal Cond	Direct from publication			DGGE of ITS2 & sequencing	Chauka 2012 WIndOceaJMarSci Diversity of Symbiodinium in Tanzania		8	2008	8	2008	No	spawner	hermaphrodite
15433	Acropora millepora	ITS2	C3u	21.9506	NA	NA	NA	NA	NA	NA	NA	NA	NA	NA	Normal Cond	Original pub		Held in capticivity at aquarium for up to 18 years	DGGE of ITS2 & sequencing	Smith 2009 JPhycol symbiodinium (dinophyta) diversity and stability in aquarium	<10-2008	NA	NA	NA	NA	No	spawner	hermaphrodite
10016	Acropora muricata	ITS2	C3u	21.9506	NA	Tanga	Western Indo-Pacific	Western Indian Ocean	East African Coral Coast		1	7	-5.15382	39.115	Normal Cond	Direct from publication			DGGE of ITS2 & sequencing	Chauka 2012 WIndOceaJMarSci Diversity of Symbiodinium in Tanzania		8	2008	8	2008	NA	spawner	hermaphrodite
8960	Acropora nasuta	ITS2	C3u	21.9506	NA	Ko Phi Phi Don	Western Indo-Pacific	Andaman	Andaman Sea Coral Coast	2-6	2	6	7.7333	98.7667	Normal Cond	Geosymbio			DGGE of ITS2 & sequencing	LaJeunesse 2010 JBiogeograph Long-standing environmental conditions isolation and host–symbiont specificity	2007-02-01	2	2007	2	2007	No	spawner	hermaphrodite
2460	Acropora robusta	ITS2	C3u	21.9506	NA	Cape Panwa	Western Indo-Pacific	Andaman	Andaman Sea Coral Coast	0-5	0	5	7.8073	98.4092	Normal Cond	Geosymbio	same_as_GU111884		DGGE of ITS2 & sequencing	LaJeunesse 2010 JBiogeograph Long-standing environmental conditions isolation and host–symbiont specificity	2007-02-01	2	2007	2	2007	No	spawner	hermaphrodite
8965	Acropora samoensis	ITS2	C3u	21.9506	NA	Cape Panwa	Western Indo-Pacific	Andaman	Andaman Sea Coral Coast	0-5	0	5	7.8073	98.4092	Normal Cond	Geosymbio			DGGE of ITS2 & sequencing	LaJeunesse 2010 JBiogeograph Long-standing environmental conditions isolation and host–symbiont specificity	2007-02-01	2	2007	2	2007	No	spawner	hermaphrodite
2468	Acropora secale	ITS2	C3u	21.9506	NA	Banda Kuu	Western Indo-Pacific	Western Indian Ocean	East African Coral Coast	3-12	3	12	-5.73012	39.3035	Normal Cond	Geosymbio	same_as_GU111879		DGGE of ITS2 & sequencing	LaJeunesse 2010 JBiogeograph Long-standing environmental conditions isolation and host–symbiont specificity	2007-04-01	4	2007	4	2007	No	spawner	hermaphrodite
8974	Acropora solitaryensis	ITS2	C3u	21.9506	NA	Ko Phi Phi Don	Western Indo-Pacific	Andaman	Andaman Sea Coral Coast	2-6	2	6	7.7333	98.7667	Normal Cond	Geosymbio			DGGE of ITS2 & sequencing	LaJeunesse 2010 JBiogeograph Long-standing environmental conditions isolation and host–symbiont specificity	2007-02-01	2	2007	2	2007	No	spawner	hermaphrodite
8222	Acropora subulata	ITS2	C3u	21.9506	NA	Tanga	Western Indo-Pacific	Western Indian Ocean	East African Coral Coast		1	7	-5.15382	39.115	Normal Cond	Direct from publication			DGGE of ITS2 & sequencing	Chauka 2012 WIndOceaJMarSci Diversity of Symbiodinium in Tanzania		8	2008	8	2008	No	spawner	hermaphrodite
8986	Acropora tenuis	ITS2	C3u	21.9506	NA	Similan Islands	Western Indo-Pacific	Andaman	Andaman Sea Coral Coast	2-12	2	12	8.6525	97.6408	Normal Cond	Geosymbio			DGGE of ITS2 & sequencing	LaJeunesse 2010 JBiogeograph Long-standing environmental conditions isolation and host–symbiont specificity	2007-02-01	2	2007	2	2007	No	spawner	hermaphrodite
8989	Acropora valida	ITS2	C3u	21.9506	NA	Cape Panwa	Western Indo-Pacific	Andaman	Andaman Sea Coral Coast	0-5	0	5	7.8073	98.4092	Normal Cond	Geosymbio			DGGE of ITS2 & sequencing	LaJeunesse 2010 JBiogeograph Long-standing environmental conditions isolation and host–symbiont specificity	2007-02-01	2	2007	2	2007	No	spawner	hermaphrodite
8997	Astrea curta	ITS2	C3u	21.9506	NA	Ko Phi Phi Don	Western Indo-Pacific	Andaman	Andaman Sea Coral Coast	2-6	2	6	7.7333	98.7667	Normal Cond	Geosymbio			DGGE of ITS2 & sequencing	LaJeunesse 2010 JBiogeograph Long-standing environmental conditions isolation and host–symbiont specificity	2007-02-01	2	2007	2	2007	No	spawner	hermaphrodite
2557	Coelastrea aspera	ITS2	C3u	21.9506	NA	Banda Kuu	Western Indo-Pacific	Western Indian Ocean	East African Coral Coast	3-12	3	12	-5.73012	39.3035	Normal Cond	Geosymbio	same_as_GU111879		DGGE of ITS2 & sequencing	LaJeunesse 2010 JBiogeograph Long-standing environmental conditions isolation and host–symbiont specificity	2007-04-01	4	2007	4	2007	No	spawner	hermaphrodite
2470	Coeloseris mayeri	ITS2	C3u	21.9506	NA	Similan Islands	Western Indo-Pacific	Andaman	Andaman Sea Coral Coast	2-12	2	12	8.6525	97.6408	Normal Cond	Geosymbio	same_as_GU111879		DGGE of ITS2 & sequencing	LaJeunesse 2010 JBiogeograph Long-standing environmental conditions isolation and host–symbiont specificity	2007-02-01	2	2007	2	2007	No	brooder	gonochore
2484	Coscinaraea columna	ITS2	C3u	21.9506	NA	Banda Kuu	Western Indo-Pacific	Western Indian Ocean	East African Coral Coast	3-12	3	12	-5.73012	39.3035	Normal Cond	Geosymbio	same_as_GU111879		DGGE of ITS2 & sequencing	LaJeunesse 2010 JBiogeograph Long-standing environmental conditions isolation and host–symbiont specificity	2007-04-01	4	2007	4	2007	NA	spawner	gonochore
9222	Ctenactis echinata	ITS2	C3u	21.9506	NA	Cape Panwa	Western Indo-Pacific	Andaman	Andaman Sea Coral Coast	0-5	0	5	7.8073	98.4092	Normal Cond	Geosymbio	same_as_AM748597		DGGE of ITS2 & sequencing	LaJeunesse 2010 JBiogeograph Long-standing environmental conditions isolation and host–symbiont specificity	2007-02-01	2	2007	2	2007	No	spawner	gonochore
8999	Cyphastrea serailia	ITS2	C3u	21.9506	NA	Ko Phi Phi Don	Western Indo-Pacific	Andaman	Andaman Sea Coral Coast	2-6	2	6	7.7333	98.7667	Normal Cond	Geosymbio			DGGE of ITS2 & sequencing	LaJeunesse 2010 JBiogeograph Long-standing environmental conditions isolation and host–symbiont specificity	2007-02-01	2	2007	2	2007	No	spawner	hermaphrodite
2486	Diploastrea heliopora	ITS2	C3u	21.9506	NA	Cape Panwa	Western Indo-Pacific	Andaman	Andaman Sea Coral Coast	0-5	0	5	7.8073	98.4092	Normal Cond	Geosymbio	same_as_GU111879		DGGE of ITS2 & sequencing	LaJeunesse 2010 JBiogeograph Long-standing environmental conditions isolation and host–symbiont specificity	2007-02-01	2	2007	2	2007	No	spawner	gonochore
9002	Dipsastraea favus	ITS2	C3u	21.9506	NA	Ko Phi Phi Leh	Western Indo-Pacific	Andaman	Andaman Sea Coral Coast	6-12	6	12	7.7333	98.7667	Normal Cond	Geosymbio			DGGE of ITS2 & sequencing	LaJeunesse 2010 JBiogeograph Long-standing environmental conditions isolation and host–symbiont specificity	2007-02-01	2	2007	2	2007	NA	NA	NA
9003	Dipsastraea lizardensis	ITS2	C3u	21.9506	NA	Ko Phi Phi Don	Western Indo-Pacific	Andaman	Andaman Sea Coral Coast	2-6	2	6	7.7333	98.7667	Normal Cond	Geosymbio			DGGE of ITS2 & sequencing	LaJeunesse 2010 JBiogeograph Long-standing environmental conditions isolation and host–symbiont specificity	2007-02-01	2	2007	2	2007	NA	spawner	hermaphrodite
9006	Dipsastraea pallida	ITS2	C3u	21.9506	NA	Ko Phi Phi Don	Western Indo-Pacific	Andaman	Andaman Sea Coral Coast	2-6	2	6	7.7333	98.7667	Normal Cond	Geosymbio			DGGE of ITS2 & sequencing	LaJeunesse 2010 JBiogeograph Long-standing environmental conditions isolation and host–symbiont specificity	2007-02-01	2	2007	2	2007	NA	spawner	hermaphrodite
9007	Dipsastraea speciosa	ITS2	C3u	21.9506	NA	Cape Panwa	Western Indo-Pacific	Andaman	Andaman Sea Coral Coast	0-5	0	5	7.8073	98.4092	Normal Cond	Geosymbio			DGGE of ITS2 & sequencing	LaJeunesse 2010 JBiogeograph Long-standing environmental conditions isolation and host–symbiont specificity	2007-02-01	2	2007	2	2007	NA	spawner	hermaphrodite
2503	Echinophyllia aspera	ITS2	C3u	21.9506	NA	Changuu	Western Indo-Pacific	Western Indian Ocean	East African Coral Coast	2-6	2	6	-6.12007	39.1681	Normal Cond	Geosymbio	same_as_GU111879		DGGE of ITS2 & sequencing	LaJeunesse 2010 JBiogeograph Long-standing environmental conditions isolation and host–symbiont specificity	2007-04-01	4	2007	4	2007	No	spawner	hermaphrodite
X57	Echinophyllia echinata	ITS2	C3u	21.9506	NA	Zanzibar	Western Indo-Pacific	Western Indian Ocean	East African Coral Coast		1	7	-6.15262	39.136	Normal Cond	Direct from publication			DGGE of ITS2 & sequencing	Chauka 2012 WIndOceaJMarSci Diversity of Symbiodinium in Tanzania		4	2008	4	2008	No	spawner	hermaphrodite
2504	Echinopora gemmacea	ITS2	C3u	21.9506	NA	Bawe	Western Indo-Pacific	Western Indian Ocean	East African Coral Coast	2-6	2	6	-6.15054	39.1315	Normal Cond	Geosymbio	same_as_GU111879		DGGE of ITS2 & sequencing	LaJeunesse 2010 JBiogeograph Long-standing environmental conditions isolation and host–symbiont specificity	2007-04-01	4	2007	4	2007	No	spawner	hermaphrodite
9009	Echinopora horrida	ITS2	C3u	21.9506	NA	Cape Panwa	Western Indo-Pacific	Andaman	Andaman Sea Coral Coast	0-5	0	5	7.8073	98.4092	Normal Cond	Geosymbio			DGGE of ITS2 & sequencing	LaJeunesse 2010 JBiogeograph Long-standing environmental conditions isolation and host–symbiont specificity	2007-02-01	2	2007	2	2007	No	spawner	hermaphrodite
9010	Echinopora lamellosa	ITS2	C3u	21.9506	NA	Cape Panwa	Western Indo-Pacific	Andaman	Andaman Sea Coral Coast	0-5	0	5	7.8073	98.4092	Normal Cond	Geosymbio			DGGE of ITS2 & sequencing	LaJeunesse 2010 JBiogeograph Long-standing environmental conditions isolation and host–symbiont specificity	2007-02-01	2	2007	2	2007	No	spawner	hermaphrodite
2517	Favites abdita	ITS2	C3u	21.9506	NA	Cape Panwa	Western Indo-Pacific	Andaman	Andaman Sea Coral Coast	0-5	0	5	7.8073	98.4092	Normal Cond	Geosymbio	GU111879		DGGE of ITS2 & sequencing	LaJeunesse 2010 JBiogeograph Long-standing environmental conditions isolation and host–symbiont specificity	2007-02-01	2	2007	2	2007	No	spawner	hermaphrodite
9017	Favites chinensis	ITS2	C3u	21.9506	NA	Banda Kuu	Western Indo-Pacific	Western Indian Ocean	East African Coral Coast	3-12	3	12	-5.73012	39.3035	Normal Cond	Geosymbio			DGGE of ITS2 & sequencing	LaJeunesse 2010 JBiogeograph Long-standing environmental conditions isolation and host–symbiont specificity	2007-04-01	4	2007	4	2007	No	spawner	hermaphrodite
2532	Favites halicora	ITS2	C3u	21.9506	NA	Ko Phi Phi Don	Western Indo-Pacific	Andaman	Andaman Sea Coral Coast	2-6	2	6	7.7333	98.7667	Normal Cond	Geosymbio	same_as_GU111879		DGGE of ITS2 & sequencing	LaJeunesse 2010 JBiogeograph Long-standing environmental conditions isolation and host–symbiont specificity	2007-02-01	2	2007	2	2007	no	spawner	hermaphrodite
9023	Favites pentagona	ITS2	C3u	21.9506	NA	Racha	Western Indo-Pacific	Andaman	Andaman Sea Coral Coast	2-5	2	5	7.6101	98.3706	Normal Cond	Geosymbio			DGGE of ITS2 & sequencing	LaJeunesse 2010 JBiogeograph Long-standing environmental conditions isolation and host–symbiont specificity	2007-02-01	2	2007	2	2007	No	spawner	hermaphrodite
9024	Favites valenciennesi	ITS2	C3u	21.9506	NA	Cape Panwa	Western Indo-Pacific	Andaman	Andaman Sea Coral Coast	0-5	0	5	7.8073	98.4092	Normal Cond	Geosymbio			DGGE of ITS2 & sequencing	LaJeunesse 2010 JBiogeograph Long-standing environmental conditions isolation and host–symbiont specificity	2007-02-01	2	2007	2	2007	no	spawner	hermaphrodite
2542	Fungia fungites	ITS2	C3u	21.9506	NA	Changuu	Western Indo-Pacific	Western Indian Ocean	East African Coral Coast	2-6	2	6	-6.12007	39.1681	Normal Cond	Geosymbio	same_as_GU111879		DGGE of ITS2 & sequencing	LaJeunesse 2010 JBiogeograph Long-standing environmental conditions isolation and host–symbiont specificity	2007-04-01	4	2007	4	2007	No	spawner	gonochore
9030	Galaxea astreata	ITS2	C3u	21.9506	NA	Changuu	Western Indo-Pacific	Western Indian Ocean	East African Coral Coast	2-6	2	6	-6.12007	39.1681	Normal Cond	Geosymbio			DGGE of ITS2 & sequencing	LaJeunesse 2010 JBiogeograph Long-standing environmental conditions isolation and host–symbiont specificity	2007-04-01	4	2007	4	2007	No	spawner	Mixed
2544	Galaxea fascicularis	ITS2	C3u	21.9506	NA	Cape Panwa	Western Indo-Pacific	Andaman	Andaman Sea Coral Coast	0-5	0	5	7.8073	98.4092	Normal Cond	Geosymbio	same_as_GU111879		DGGE of ITS2 & sequencing	LaJeunesse 2010 JBiogeograph Long-standing environmental conditions isolation and host–symbiont specificity	2007-02-01	2	2007	2	2007	No	spawner	gonochore
9037	Gardineroseris planulata	ITS2	C3u	21.9506	NA	Cape Panwa	Western Indo-Pacific	Andaman	Andaman Sea Coral Coast	0-5	0	5	7.8073	98.4092	Normal Cond	Geosymbio			DGGE of ITS2 & sequencing	LaJeunesse 2010 JBiogeograph Long-standing environmental conditions isolation and host–symbiont specificity	2007-02-01	2	2007	2	2007	no	spawner	gonochore
9042	Goniastrea edwardsi	ITS2	C3u	21.9506	NA	Ko Phi Phi Don	Western Indo-Pacific	Andaman	Andaman Sea Coral Coast	2-6	2	6	7.7333	98.7667	Normal Cond	Geosymbio			DGGE of ITS2 & sequencing	LaJeunesse 2010 JBiogeograph Long-standing environmental conditions isolation and host–symbiont specificity	2007-02-01	2	2007	2	2007	No	spawner	hermaphrodite
9233	Goniastrea favulus	ITS2	C3u	21.9506	NA	Cape Panwa	Western Indo-Pacific	Andaman	Andaman Sea Coral Coast	0-5	0	5	7.8073	98.4092	Normal Cond	Geosymbio			DGGE of ITS2 & sequencing	LaJeunesse 2010 JBiogeograph Long-standing environmental conditions isolation and host–symbiont specificity	2007-02-01	2	2007	2	2007	No	spawner	hermaphrodite
9045	Goniastrea pectinata	ITS2	C3u	21.9506	NA	Cape Panwa	Western Indo-Pacific	Andaman	Andaman Sea Coral Coast	0-5	0	5	7.8073	98.4092	Normal Cond	Geosymbio			DGGE of ITS2 & sequencing	LaJeunesse 2010 JBiogeograph Long-standing environmental conditions isolation and host–symbiont specificity	2007-02-01	2	2007	2	2007	No	spawner	hermaphrodite
2579	Goniastrea retiformis	ITS2	C3u	21.9506	NA	Cape Panwa	Western Indo-Pacific	Andaman	Andaman Sea Coral Coast	0-5	0	5	7.8073	98.4092	Normal Cond	Geosymbio	same_as_GU111879		DGGE of ITS2 & sequencing	LaJeunesse 2010 JBiogeograph Long-standing environmental conditions isolation and host–symbiont specificity	2007-02-01	2	2007	2	2007	No	spawner	hermaphrodite
9063	Herpolitha limax	ITS2	C3u	21.9506	NA	Cape Panwa	Western Indo-Pacific	Andaman	Andaman Sea Coral Coast	0-5	0	5	7.8073	98.4092	Normal Cond	Geosymbio			DGGE of ITS2 & sequencing	LaJeunesse 2010 JBiogeograph Long-standing environmental conditions isolation and host–symbiont specificity	2007-02-01	2	2007	2	2007	no	spawner	gonochore
2587	Hydnophora exesa	ITS2	C3u	21.9506	NA	Cape Panwa	Western Indo-Pacific	Andaman	Andaman Sea Coral Coast	0-5	0	5	7.8073	98.4092	Normal Cond	Geosymbio	same_as_GU111879		DGGE of ITS2 & sequencing	LaJeunesse 2010 JBiogeograph Long-standing environmental conditions isolation and host–symbiont specificity	2007-02-01	2	2007	2	2007	No	spawner	hermaphrodite
9070	Hydnophora microconos	ITS2	C3u	21.9506	NA	Cape Panwa	Western Indo-Pacific	Andaman	Andaman Sea Coral Coast	0-5	0	5	7.8073	98.4092	Normal Cond	Geosymbio			DGGE of ITS2 & sequencing	LaJeunesse 2010 JBiogeograph Long-standing environmental conditions isolation and host–symbiont specificity	2007-02-01	2	2007	2	2007	No	spawner	hermaphrodite
2595	Hydnophora rigida	ITS2	C3u	21.9506	NA	Cape Panwa	Western Indo-Pacific	Andaman	Andaman Sea Coral Coast	0-5	0	5	7.8073	98.4092	Normal Cond	Geosymbio	same_as_GU111879		DGGE of ITS2 & sequencing	LaJeunesse 2010 JBiogeograph Long-standing environmental conditions isolation and host–symbiont specificity	2007-02-01	2	2007	2	2007	No	spawner	hermaphrodite
9079	Leptastrea pruinosa	ITS2	C3u	21.9506	NA	Similan Islands	Western Indo-Pacific	Andaman	Andaman Sea Coral Coast	2-12	2	12	8.6525	97.6408	Normal Cond	Geosymbio			DGGE of ITS2 & sequencing	LaJeunesse 2010 JBiogeograph Long-standing environmental conditions isolation and host–symbiont specificity	2007-02-01	2	2007	2	2007	No	spawner	gonochore
2601	Leptoria phrygia	ITS2	C3u	21.9506	NA	Ko Phi Phi Don	Western Indo-Pacific	Andaman	Andaman Sea Coral Coast	2-6	2	6	7.7333	98.7667	Normal Cond	Geosymbio	same_as_GU111879		DGGE of ITS2 & sequencing	LaJeunesse 2010 JBiogeograph Long-standing environmental conditions isolation and host–symbiont specificity	2007-02-01	2	2007	2	2007	No	spawner	hermaphrodite
2610	Lobophyllia hemprichii	ITS2	C3u	21.9506	NA	Changuu	Western Indo-Pacific	Western Indian Ocean	East African Coral Coast	2-6	2	6	-6.12007	39.1681	Normal Cond	Geosymbio	same_as_GU111879		DGGE of ITS2 & sequencing	LaJeunesse 2010 JBiogeograph Long-standing environmental conditions isolation and host–symbiont specificity	2007-04-01	4	2007	4	2007	No	spawner	hermaphrodite
9083	Merulina ampliata	ITS2	C3u	21.9506	NA	Cape Panwa	Western Indo-Pacific	Andaman	Andaman Sea Coral Coast	0-5	0	5	7.8073	98.4092	Normal Cond	Geosymbio			DGGE of ITS2 & sequencing	LaJeunesse 2010 JBiogeograph Long-standing environmental conditions isolation and host–symbiont specificity	2007-02-01	2	2007	2	2007	No	spawner	hermaphrodite
2614	Merulina scabricula	ITS2	C3u	21.9506	NA	Koh Hae	Western Indo-Pacific	Andaman	Andaman Sea Coral Coast	2-6	2	6	7.7456	98.3763	Normal Cond	Geosymbio	same_as_GU111879		DGGE of ITS2 & sequencing	LaJeunesse 2010 JBiogeograph Long-standing environmental conditions isolation and host–symbiont specificity	2007-02-01	2	2007	2	2007	No	spawner	hermaphrodite
2626	Mycedium elephantotus	ITS2	C3u	21.9506	NA	Bawe	Western Indo-Pacific	Western Indian Ocean	East African Coral Coast	2-6	2	6	-6.15054	39.1315	Normal Cond	Geosymbio	same_as_GU111879		DGGE of ITS2 & sequencing	LaJeunesse 2010 JBiogeograph Long-standing environmental conditions isolation and host–symbiont specificity	2007-04-01	4	2007	4	2007	No	spawner	hermaphrodite
9123	Oulophyllia crispa	ITS2	C3u	21.9506	NA	Banda Kuu	Western Indo-Pacific	Western Indian Ocean	East African Coral Coast	3-12	3	12	-5.73012	39.3035	Normal Cond	Geosymbio			DGGE of ITS2 & sequencing	LaJeunesse 2010 JBiogeograph Long-standing environmental conditions isolation and host–symbiont specificity	2007-04-01	4	2007	4	2007	no	spawner	hermaphrodite
9127	Oxypora lacera	ITS2	C3u	21.9506	NA	Ko Phi Phi Don	Western Indo-Pacific	Andaman	Andaman Sea Coral Coast	2-6	2	6	7.7333	98.7667	Normal Cond	Geosymbio			DGGE of ITS2 & sequencing	LaJeunesse 2010 JBiogeograph Long-standing environmental conditions isolation and host–symbiont specificity	2007-02-01	2	2007	2	2007	No	spawner	hermaphrodite
9128	Pachyseris rugosa	ITS2	C3u	21.9506	NA	Banda Kuu	Western Indo-Pacific	Western Indian Ocean	East African Coral Coast	3-12	3	12	-5.73012	39.3035	Normal Cond	Geosymbio			DGGE of ITS2 & sequencing	LaJeunesse 2010 JBiogeograph Long-standing environmental conditions isolation and host–symbiont specificity	2007-04-01	4	2007	4	2007	No	spawner	gonochore
9135	Pavona duerdeni	ITS2	C3u	21.9506	NA	Similan Islands	Western Indo-Pacific	Andaman	Andaman Sea Coral Coast	2-12	2	12	8.6525	97.6408	Normal Cond	Geosymbio			DGGE of ITS2 & sequencing	LaJeunesse 2010 JBiogeograph Long-standing environmental conditions isolation and host–symbiont specificity	2007-02-01	2	2007	2	2007	NA	spawner	gonochore
9139	Pavona explanulata	ITS2	C3u	21.9506	NA	Ko Phi Phi Leh	Western Indo-Pacific	Andaman	Andaman Sea Coral Coast	6-12	6	12	7.7333	98.7667	Normal Cond	Geosymbio			DGGE of ITS2 & sequencing	LaJeunesse 2010 JBiogeograph Long-standing environmental conditions isolation and host–symbiont specificity	2007-02-01	2	2007	2	2007	No	spawner	gonochore
9143	Pavona maldivensis	ITS2	C3u	21.9506	NA	Banda Kuu	Western Indo-Pacific	Western Indian Ocean	East African Coral Coast	3-12	3	12	-5.73012	39.3035	Normal Cond	Geosymbio			DGGE of ITS2 & sequencing	LaJeunesse 2010 JBiogeograph Long-standing environmental conditions isolation and host–symbiont specificity	2007-04-01	4	2007	4	2007	No	spawner	gonochore
9144	Pavona minuta	ITS2	C3u	21.9506	NA	Ko Phi Phi Leh	Western Indo-Pacific	Andaman	Andaman Sea Coral Coast	6-12	6	12	7.7333	98.7667	Normal Cond	Geosymbio			DGGE of ITS2 & sequencing	LaJeunesse 2010 JBiogeograph Long-standing environmental conditions isolation and host–symbiont specificity	2007-02-01	2	2007	2	2007	No	spawner	gonochore
2641	Pavona varians	ITS2	C3u	21.9506	NA	Cape Panwa	Western Indo-Pacific	Andaman	Andaman Sea Coral Coast	0-5	0	5	7.8073	98.4092	Normal Cond	Geosymbio	same_as_GU111879		DGGE of ITS2 & sequencing	LaJeunesse 2010 JBiogeograph Long-standing environmental conditions isolation and host–symbiont specificity	2007-02-01	2	2007	2	2007	No	spawner	gonochore
9145	Pavona venosa	ITS2	C3u	21.9506	NA	Ko Phi Phi Don	Western Indo-Pacific	Andaman	Andaman Sea Coral Coast	2-6	2	6	7.7333	98.7667	Normal Cond	Geosymbio			DGGE of ITS2 & sequencing	LaJeunesse 2010 JBiogeograph Long-standing environmental conditions isolation and host–symbiont specificity	2007-02-01	2	2007	2	2007	No	spawner	gonochore
9146	Pectinia alcicornis	ITS2	C3u	21.9506	NA	Cape Panwa	Western Indo-Pacific	Andaman	Andaman Sea Coral Coast	0-5	0	5	7.8073	98.4092	Normal Cond	Geosymbio			DGGE of ITS2 & sequencing	LaJeunesse 2010 JBiogeograph Long-standing environmental conditions isolation and host–symbiont specificity	2007-02-01	2	2007	2	2007	No	spawner	hermaphrodite
9149	Pectinia lactuca	ITS2	C3u	21.9506	NA	Ko Phi Phi Don	Western Indo-Pacific	Andaman	Andaman Sea Coral Coast	2-6	2	6	7.7333	98.7667	Normal Cond	Geosymbio			DGGE of ITS2 & sequencing	LaJeunesse 2010 JBiogeograph Long-standing environmental conditions isolation and host–symbiont specificity	2007-02-01	2	2007	2	2007	No	spawner	hermaphrodite
9150	Pectinia paeonia	ITS2	C3u	21.9506	NA	Koh Hae	Western Indo-Pacific	Andaman	Andaman Sea Coral Coast	2-6	2	6	7.7456	98.3763	Normal Cond	Geosymbio			DGGE of ITS2 & sequencing	LaJeunesse 2010 JBiogeograph Long-standing environmental conditions isolation and host–symbiont specificity	2007-02-01	2	2007	2	2007	No	spawner	hermaphrodite
9151	Physogyra lichtensteini	ITS2	C3u	21.9506	NA	Bawe	Western Indo-Pacific	Western Indian Ocean	East African Coral Coast	2-6	2	6	-6.15054	39.1315	Normal Cond	Geosymbio			DGGE of ITS2 & sequencing	LaJeunesse 2010 JBiogeograph Long-standing environmental conditions isolation and host–symbiont specificity	2007-04-01	4	2007	4	2007	No	spawner	gonochore
2647	Platygyra daedalea	ITS2	C3u	21.9506	NA	Ko Phi Phi Don	Western Indo-Pacific	Andaman	Andaman Sea Coral Coast	2-6	2	6	7.7333	98.7667	Normal Cond	Geosymbio	same_as_GU111879		DGGE of ITS2 & sequencing	LaJeunesse 2010 JBiogeograph Long-standing environmental conditions isolation and host–symbiont specificity	2007-02-01	2	2007	2	2007	No	spawner	hermaphrodite
9158	Platygyra pini	ITS2	C3u	21.9506	NA	Ko Phi Phi Leh	Western Indo-Pacific	Andaman	Andaman Sea Coral Coast	6-12	6	12	7.7333	98.7667	Normal Cond	Geosymbio			DGGE of ITS2 & sequencing	LaJeunesse 2010 JBiogeograph Long-standing environmental conditions isolation and host–symbiont specificity	2007-02-01	2	2007	2	2007	No	spawner	hermaphrodite
2660	Platygyra sinensis	ITS2	C3u	21.9506	NA	Cape Panwa	Western Indo-Pacific	Andaman	Andaman Sea Coral Coast	0-5	0	5	7.8073	98.4092	Normal Cond	Geosymbio	same_as_GU111879		DGGE of ITS2 & sequencing	LaJeunesse 2010 JBiogeograph Long-standing environmental conditions isolation and host–symbiont specificity	2007-02-01	2	2007	2	2007	No	spawner	hermaphrodite
9160	Platygyra verweyi	ITS2	C3u	21.9506	NA	Cape Panwa	Western Indo-Pacific	Andaman	Andaman Sea Coral Coast	0-5	0	5	7.8073	98.4092	Normal Cond	Geosymbio			DGGE of ITS2 & sequencing	LaJeunesse 2010 JBiogeograph Long-standing environmental conditions isolation and host–symbiont specificity	2007-02-01	2	2007	2	2007	No	spawner	hermaphrodite
9168	Plerogyra sinuosa	ITS2	C3u	21.9506	NA	Ko Phi Phi Leh	Western Indo-Pacific	Andaman	Andaman Sea Coral Coast	6-12	6	12	7.7333	98.7667	Normal Cond	Geosymbio			DGGE of ITS2 & sequencing	LaJeunesse 2010 JBiogeograph Long-standing environmental conditions isolation and host–symbiont specificity	2007-02-01	2	2007	2	2007	No	spawner	gonochore
X58	Pleuractis granulosa	ITS2	C3u	21.9506	NA	Zanzibar	Western Indo-Pacific	Western Indian Ocean	East African Coral Coast		1	7	-6.15262	39.136	Normal Cond	Direct from publication			DGGE of ITS2 & sequencing	Chauka 2012 WIndOceaJMarSci Diversity of Symbiodinium in Tanzania		4	2008	4	2008	No	spawner	gonochore
9185	Podabacia crustacea	ITS2	C3u	21.9506	NA	Bawe	Western Indo-Pacific	Western Indian Ocean	East African Coral Coast	2-6	2	6	-6.15054	39.1315	Normal Cond	Geosymbio			DGGE of ITS2 & sequencing	LaJeunesse 2010 JBiogeograph Long-standing environmental conditions isolation and host–symbiont specificity	2007-04-01	4	2007	4	2007	No	spawner	gonochore
9197	Psammocora digitata	ITS2	C3u	21.9506	NA	Koh Hae	Western Indo-Pacific	Andaman	Andaman Sea Coral Coast	2-6	2	6	7.7456	98.3763	Normal Cond	Geosymbio			DGGE of ITS2 & sequencing	LaJeunesse 2010 JBiogeograph Long-standing environmental conditions isolation and host–symbiont specificity	2007-02-01	2	2007	2	2007	No	spawner	gonochore
9200	Symphyllia agaricia	ITS2	C3u	21.9506	NA	Ko Phi Phi Leh	Western Indo-Pacific	Andaman	Andaman Sea Coral Coast	6-12	6	12	7.7333	98.7667	Normal Cond	Geosymbio			DGGE of ITS2 & sequencing	LaJeunesse 2010 JBiogeograph Long-standing environmental conditions isolation and host–symbiont specificity	2007-02-01	2	2007	2	2007	No	spawner	hermaphrodite
9201	Symphyllia radians	ITS2	C3u	21.9506	NA	Cape Panwa	Western Indo-Pacific	Andaman	Andaman Sea Coral Coast	0-5	0	5	7.8073	98.4092	Normal Cond	Geosymbio			DGGE of ITS2 & sequencing	LaJeunesse 2010 JBiogeograph Long-standing environmental conditions isolation and host–symbiont specificity	2007-02-01	2	2007	2	2007	No	spawner	hermaphrodite
2767	Symphyllia recta	ITS2	C3u	21.9506	NA	Banda Kuu	Western Indo-Pacific	Western Indian Ocean	East African Coral Coast	3-12	3	12	-5.73012	39.3035	Normal Cond	Geosymbio	same_as_GU111879		DGGE of ITS2 & sequencing	LaJeunesse 2010 JBiogeograph Long-standing environmental conditions isolation and host–symbiont specificity	2007-04-01	4	2007	4	2007	No	spawner	hermaphrodite
9390	Porites divaricata	ITS2	C4	22.9748	NA	Belize	Tropical Atlantic	Tropical Northwestern Atlantic	Western Caribbean	>10	10	30	17	-88	Normal Cond	Original pub			DGGE of ITS2 & sequencing	Finney 2010 MicrobEcol The Relative Significance of Host–Habitat	Jul 02 -Aug 03	7	2002	8	2003	Yes	brooder	gonochore
8904	Porites furcata	ITS2	C4	22.9748	NA	Puerto Morelos, Yucatan, Mexico	Tropical Atlantic	Tropical Northwestern Atlantic	Southern Gulf of Mexico	5	5	5	21	-87	Normal Cond	Riddle 2011	NA		DGGE of ITS2 & sequencing	LaJeunesse 2002 MarBiol Diversity and community structure of symbiotic dinoflagellates	Aug 1998, Sep 1999	8	1998	9	1999	NA	brooder	gonochore
1421	Porites porites	ITS2	C4	22.9748	NA	Belize	Tropical Atlantic	Tropical Northwestern Atlantic	Western Caribbean	1-5	1	5	17	-88	Normal Cond	Original pub	same_as_AF499794		DGGE of ITS2 & sequencing	Finney 2010 MicrobEcol The Relative Significance of Host–Habitat	Jul 02 -Aug 03	7	2002	8	2003	Yes	brooder	gonochore
X59	Meandrina meandrites	ITS2	A2	23.0189	NA	Jamaica	Tropical Atlantic	Tropical Northwestern Atlantic	Greater Antilles	NA	NA	NA	NA	NA	NA	Original pub			NA	LaJeunesse 2001 JPhycol Investigating the biodiversity	NA	NA	NA	NA	NA	No	spawner	Mixed
1469	Agaricia agaricites	ITS2	B1	23.6273	NA	Barbados	Tropical Atlantic	Tropical Northwestern Atlantic	Eastern Caribbean	6-10	6	10	13.07	-60	Normal Cond	Original pub	same_as_AF333511		DGGE of ITS2 & sequencing	Finney 2010 MicrobEcol The Relative Significance of Host–Habitat	Jul 02 -Aug 03	7	2002	8	2003	Yes	brooder	gonochore
1497	Agaricia fragilis	ITS2	B1	23.6273	NA	Barbados	Tropical Atlantic	Tropical Northwestern Atlantic	Eastern Caribbean	>10	10	30	13.07	-60	Normal Cond	Original pub	same_as_AF333511		DGGE of ITS2 & sequencing	Finney 2010 MicrobEcol The Relative Significance of Host–Habitat	Jul 02 -Aug 03	7	2002	8	2003	NA	brooder	gonochore
9247	Agaricia humilis	ITS2	B1	23.6273	NA	Barbados	Tropical Atlantic	Tropical Northwestern Atlantic	Eastern Caribbean	>10	10	30	13.07	-60	Normal Cond	Original pub			DGGE of ITS2 & sequencing	Finney 2010 MicrobEcol The Relative Significance of Host–Habitat	Jul 02 -Aug 03	7	2002	8	2003	yes	brooder	gonochore
8862	Cladocora arbuscula	ITS2	B1	23.6273	NA	Puerto Morelos, Yucatan, Mexico	Tropical Atlantic	Tropical Northwestern Atlantic	Southern Gulf of Mexico	2	2	2	21	-87	Normal Cond	Riddle 2011	NA		DGGE of ITS2 & sequencing	LaJeunesse 2002 MarBiol Diversity and community structure of symbiotic dinoflagellates	Aug 1998, Sep 1999	8	1998	9	1999	NA	NA	gonochore
9266	Colpophyllia natans	ITS2	B1	23.6273	NA	Barbados	Tropical Atlantic	Tropical Northwestern Atlantic	Eastern Caribbean	>10	10	30	13.07	-60	Normal Cond	Original pub			DGGE of ITS2 & sequencing	Finney 2010 MicrobEcol The Relative Significance of Host–Habitat	Jul 02 -Aug 03	7	2002	8	2003	No	spawner	hermaphrodite
1514	Dendrogyra cylindrus	ITS2	B1	23.6273	NA	Belize	Tropical Atlantic	Tropical Northwestern Atlantic	Western Caribbean	6-10	6	10	17	-88	Normal Cond	Original pub	same_as_AF333511		DGGE of ITS2 & sequencing	Finney 2010 MicrobEcol The Relative Significance of Host–Habitat	Jul 02 -Aug 03	7	2002	8	2003	NA	spawner	gonochore
9280	Dichocoenia stokesii	ITS2	B1	23.6273	NA	Barbados	Tropical Atlantic	Tropical Northwestern Atlantic	Eastern Caribbean	>10	10	30	13.07	-60	Normal Cond	Original pub			DGGE of ITS2 & sequencing	Finney 2010 MicrobEcol The Relative Significance of Host–Habitat	Jul 02 -Aug 03	7	2002	8	2003	NA	spawner	NA
1579	Diploria clivosa	ITS2	B1	23.6273	NA	Barbados	Tropical Atlantic	Tropical Northwestern Atlantic	Eastern Caribbean	1-5	1	5	13.07	-60	Normal Cond	Original pub	same_as_AF333511		DGGE of ITS2 & sequencing	Finney 2010 MicrobEcol The Relative Significance of Host–Habitat	Jul 02 -Aug 03	7	2002	8	2003	No	spawner	hermaphrodite
9285	Diploria labyrinthiformis	ITS2	B1	23.6273	NA	Barbados	Tropical Atlantic	Tropical Northwestern Atlantic	Eastern Caribbean	6-10	6	10	13.07	-60	Normal Cond	Original pub			DGGE of ITS2 & sequencing	Finney 2010 MicrobEcol The Relative Significance of Host–Habitat	Jul 02 -Aug 03	7	2002	8	2003	No	spawner	hermaphrodite
1566	Diploria strigosa	ITS2	B1	23.6273	NA	Barbados	Tropical Atlantic	Tropical Northwestern Atlantic	Eastern Caribbean	>10	10	30	13.07	-60	Normal Cond	Original pub	same_as_AF333511		DGGE of ITS2 & sequencing	Finney 2010 MicrobEcol The Relative Significance of Host–Habitat	Jul 02 -Aug 03	7	2002	8	2003	No	spawner	hermaphrodite
9299	Eusmilia fastigiata	ITS2	B1	23.6273	NA	Barbados	Tropical Atlantic	Tropical Northwestern Atlantic	Eastern Caribbean	>10	10	30	13.07	-60	Normal Cond	Original pub			DGGE of ITS2 & sequencing	Finney 2010 MicrobEcol The Relative Significance of Host–Habitat	Jul 02 -Aug 03	7	2002	8	2003	No	spawner	gonochore
1547	Favia fragum	ITS2	B1	23.6273	NA	Barbados	Tropical Atlantic	Tropical Northwestern Atlantic	Eastern Caribbean	1-5	1	5	13.07	-60	Normal Cond	Original pub	same_as_AF333511		DGGE of ITS2 & sequencing	Finney 2010 MicrobEcol The Relative Significance of Host–Habitat	Jul 02 -Aug 03	7	2002	8	2003	Yes	brooder	hermaphrodite
9303	Isophyllia rigida	ITS2	B1	23.6273	NA	Belize	Tropical Atlantic	Tropical Northwestern Atlantic	Western Caribbean	6-10	6	10	17	-88	Normal Cond	Original pub			DGGE of ITS2 & sequencing	Finney 2010 MicrobEcol The Relative Significance of Host–Habitat	Jul 02 -Aug 03	7	2002	8	2003	NA	brooder	NA
9304	Isophyllia sinuosa	ITS2	B1	23.6273	NA	Belize	Tropical Atlantic	Tropical Northwestern Atlantic	Western Caribbean	1-5	1	5	17	-88	Normal Cond	Original pub	AF499790		DGGE of ITS2 & sequencing	Finney 2010 MicrobEcol The Relative Significance of Host–Habitat	Jul 02 -Aug 03	7	2002	8	2003	Yes	brooder	gonochore
8877	Madracis formosa	ITS2	B1	23.6273	NA	Lee Stocking Island, Bahamas	Tropical Atlantic	Tropical Northwestern Atlantic	Bahamian	4	4	4	24	-76	Normal Cond	Riddle 2011	NA		DGGE of ITS2 & sequencing	LaJeunesse 2002 MarBiol Diversity and community structure of symbiotic dinoflagellates	Aug 1998, Sep 1999	8	1998	9	1999	yes	brooder	hermaphrodite
9343	Manicina areolata	ITS2	B1	23.6273	NA	Belize	Tropical Atlantic	Tropical Northwestern Atlantic	Western Caribbean	>10	10	30	17	-88	Normal Cond	Original pub			DGGE of ITS2 & sequencing	Finney 2010 MicrobEcol The Relative Significance of Host–Habitat	Jul 02 -Aug 03	7	2002	8	2003	yes	brooder	hermaphrodite
1531	Meandrina meandrites	ITS2	B1	23.6273	NA	Barbados	Tropical Atlantic	Tropical Northwestern Atlantic	Eastern Caribbean	>10	10	30	13.07	-60	Normal Cond	Original pub	same_as_AF333511		DGGE of ITS2 & sequencing	Finney 2010 MicrobEcol The Relative Significance of Host–Habitat	Jul 02 -Aug 03	7	2002	8	2003	No	spawner	Mixed
6314	Orbicella annularis	ITS2	B1	23.6273	NA	Florida Keys	Tropical Atlantic	Tropical Northwestern Atlantic	Floridian	12	12	12	24.98	-80.36	Normal conditions	GeoSymbio	same_as_AF333511	Conch	DGGE of ITS2	Thornhill 2006 MarBiol Multi-year seasonal genotypic surveys of coral-algal symbioses		3	2002	3	2002	No	spawner	hermaphrodite
6243	Orbicella faveolata	ITS2	B1	23.6273	NA	Lee Stocking Island	Tropical Atlantic	Tropical Northwestern Atlantic	Bahamian	4	4	4	24.25	-76.5	Normal conditions	GeoSymbio	same_as_AF333511	North Norman's Patch	DGGE of ITS2	Thornhill 2006 MarBiol Multi-year seasonal genotypic surveys of coral-algal symbioses		11	2002	11	2002	No	spawner	hermaphrodite
6318	Orbicella franksi	ITS2	B1	23.6273	NA	Lee Stocking Island	Tropical Atlantic	Tropical Northwestern Atlantic	Bahamian	12	12	12	24.25	-76.5	Normal conditions	GeoSymbio	same_as_AF333511	South Perry	DGGE of ITS2	Thornhill 2006 MarBiol Multi-year seasonal genotypic surveys of coral-algal symbioses		11	2002	11	2002	No	spawner	hermaphrodite
1453	Porites astreoides	ITS2	B1	23.6273	NA	Barbados	Tropical Atlantic	Tropical Northwestern Atlantic	Eastern Caribbean	>10	10	30	13.07	-60	Normal Cond	Original pub	same_as_AF333511		DGGE of ITS2 & sequencing	Finney 2010 MicrobEcol The Relative Significance of Host–Habitat	Jul 02 -Aug 03	7	2002	8	2003	Yes	brooder	Mixed
8898	Porites furcata	ITS2	B1	23.6273	1	Puerto Morelos, Yucatan, Mexico	Tropical Atlantic	Tropical Northwestern Atlantic	Southern Gulf of Mexico	1.5	1.5	1.5	21	-87	Normal Cond	Riddle 2011	NA		DGGE of ITS2 & sequencing	LaJeunesse 2002 MarBiol Diversity and community structure of symbiotic dinoflagellates	Aug 1998, Sep 1999	8	1998	9	1999	NA	brooder	gonochore
9394	Siderastrea radians	ITS2	B1	23.6273	NA	Barbados	Tropical Atlantic	Tropical Northwestern Atlantic	Eastern Caribbean	>10	10	30	13.07	-60	Normal Cond	Original pub			DGGE of ITS2 & sequencing	Finney 2010 MicrobEcol The Relative Significance of Host–Habitat	Jul 02 -Aug 03	7	2002	8	2003	yes	brooder	gonochore
X60	Coscinaraea marshae	ITS2	B40	23.7067	NA	Rottnest	Temperate Australasia	Southwest Australian Shelf	Leeuwin	<7	0	7	-32.014	115.554	Normal Cond		EU099827		DGGE of ITS2 & sequencing	Silverstein 2011 MEPS Novel algal symbiont diversity in reef corals of Western Australia	2005-06-01	6	2005	6	2005	NA	spawner	NA
X61	Coscinaraea mcneilli	ITS3	B40	24.7067	NA	Dunsborough	Temperate Australasia	Southwest Australian Shelf	Leeuwin	15	15	15	-33.6141	115.116	Normal Cond				DGGE of ITS2 & sequencing	Silverstein 2011 MEPS Novel algal symbiont diversity in reef corals of Western Australia	2005-06-01	6	2005	6	2005	No	spawner	gonochore
14109	Montipora mollis	ITS2	C124	23.7067	NA	Rottnest	Temperate Australasia	Southwest Australian Shelf	Leeuwin	<7	0	7	-32.014	115.554	Normal Cond		EU099827		DGGE of ITS2 & sequencing	Silverstein 2011 MEPS Novel algal symbiont diversity in reef corals of Western Australia	2005-06-01	6	2005	6	2005	Yes	spawner	hermaphrodite
14110	Montipora mollis	ITS2	C128	23.7067	NA	Rottnest	Temperate Australasia	Southwest Australian Shelf	Leeuwin	<7	0	7	-32.014	115.554	Normal Cond		EU099821		DGGE of ITS2 & sequencing	Silverstein 2011 MEPS Novel algal symbiont diversity in reef corals of Western Australia	2005-06-01	6	2005	6	2005	Yes	spawner	hermaphrodite
X62	Stylophora pistillata	ITS2	C8b	23.7067	NA	Lizard Island, GBR	Central Indo-Pacific	Northeast Australian Shelf	Torres Strait Northern Great Barrier Reef	27	27	27	-14.6166	145.636	Normal Conditions				DGGE of ITS2 & sequencing	Tonk 2014 JPhycol Symbiodinium diversity in reef invertebrates		10	2007	9	2008	Yes	brooder	hermaphrodite
9590	Montipora capitata	ITS2	C31	25.1993	NA	Oahu	Eastern Indo-Pacific	Hawaii	Hawaii	1-5	1	5	21.4667	-157.983	Normal Cond	Aquarist	AY258496	Article does not say where each sample was from, but all sites (Kaneohe Bay, Haleiwa Trench, and Wailua Bay) are off the island of Oahu	DGGE of ITS2 & sequencing	LaJeunesse 2004 CoralReefs High diversity and host specificity observed among symbiotic	<10-2003	NA	NA	NA	NA	Yes	spawner	hermaphrodite
9746	Montipora danae	ITS2	C31	25.1993	NA	Zamami Island, Japan	Central Indo-Pacific	South Kuroshio	South Kuroshio	1-10	1	10	26.2346	127.305	Normal Cond	Riddle 2011			DGGE of ITS2 & sequencing	LaJeunesse 2004 MEPS Closely related Symbiodinium spp differ in relative dominance	March (2002)	3	2002	3	2002	Yes	spawner	hermaphrodite
15139	Montipora mollis	ITS2	C31	25.1993	NA	Luhuitou Bay	Central Indo-Pacific	South China Sea	Gulf of Tonkin	1-10 m	1	10	18.2217	109.495	Normal conditions	Original pub	AY258496		DGGE of ITS2 & sequencing	Zhou 2011 JSysEvol Low genetic diversity of symbiotic dinoflagellates	Oct '08	10	2008	10	2008	Yes	spawner	hermaphrodite
9236	Montipora monasteriata	ITS2	C31	25.1993	NA	Banda Kuu	Western Indo-Pacific	Western Indian Ocean	East African Coral Coast	3-12	3	12	-5.73012	39.3035	Normal Cond	Geosymbio			DGGE of ITS2 & sequencing	LaJeunesse 2010 JBiogeograph Long-standing environmental conditions isolation and host–symbiont specificity	2007-04-01	4	2007	4	2007	Yes	spawner	hermaphrodite
9608	Montipora patula	ITS2	C31	25.1993	n/a	Oahu	Eastern Indo-Pacific	Hawaii	Hawaii	20	20	20	21.4667	-157.983	Normal Cond	Aquarist		Article does not say where each sample was from, but all sites (Kaneohe Bay, Haleiwa Trench, and Wailua Bay) are off the island of Oahu	DGGE of ITS2 & sequencing	LaJeunesse 2004 CoralReefs High diversity and host specificity observed among symbiotic	<10-2003	NA	NA	NA	NA	Yes	spawner	hermaphrodite
9754	Montipora venosa	ITS2	C31	25.1993	NA	Zamami Island, Japan	Central Indo-Pacific	South Kuroshio	South Kuroshio	1-10	1	10	26.2346	127.305	Normal Cond	Riddle 2011			DGGE of ITS2 & sequencing	LaJeunesse 2004 MEPS Closely related Symbiodinium spp differ in relative dominance	March (2002)	3	2002	3	2002	Yes	spawner	hermaphrodite
3023	Montipora verrucosa	ITS2	C31	25.1993	NA	Zamami Island, Japan	Central Indo-Pacific	South Kuroshio	South Kuroshio	1-10	1	10	26.2346	127.305	Normal Cond	Aquarist			DGGE of ITS2 & sequencing	LaJeunesse 2004 MEPS Closely related Symbiodinium spp differ in relative dominance	March (2002)	3	2002	3	2002	Yes	spawner	hermaphrodite
16831	Pocillopora meandrina	ITS2	C31	25.1993	NA	Gardner	Eastern Indo-Pacific	Hawaii	Hawaii	10-20'	10	20	25.0014	-168.237	Normal Conditions	Original pub			Cloning of ITS2 & sequencing	Stat 2015 CoralReefs Geographic structure and host specificity	2005-2009	NA	2005	NA	2009	Yes	spawner	hermaphrodite
16969	Porites lobata	ITS2	C31	25.1993	NA	Pearl and Hermes	Eastern Indo-Pacific	Hawaii	Hawaii	0-10'	0	10	28.0944	-175.857	Normal Conditions	Original pub			Cloning of ITS2 & sequencing	Stat 2015 CoralReefs Geographic structure and host specificity	2005-2009	NA	2005	NA	2009	Yes	spawner	gonochore
4948	Pocillopora damicornis	ITS2	C42a	25.9017	NA	TenementsII	Central Indo-Pacific	East Central Australian Shelf	Tweed-Moreton	3-5	3	5	-23.6897	152.127	Normal	SymbioGBR			DGGE of ITS2 & sequencing	Sampayo 2007 MolEcol Niche partitioning of closely related symbiotic dinoflagellates		10	2004	10	2005	Yes	brooder	hermaphrodite
2680	Pocillopora eydouxi	ITS2	C42a	25.9017	NA	Changuu	Western Indo-Pacific	Western Indian Ocean	East African Coral Coast	2-6	2	6	-6.12007	39.1681	Normal Cond	Geosymbio	same_as_FJ529656		DGGE of ITS2 & sequencing	LaJeunesse 2010 JBiogeograph Long-standing environmental conditions isolation and host–symbiont specificity	2007-04-01	4	2007	4	2007	Yes	spawner	hermaphrodite
16248	Pocillopora verrucosa	ITS2	C42a	25.9017	NA	Penguin Spit Inner	Eastern Indo-Pacific	Central Polynesia	Line Islands	2-3	2	3	5.87389	-162.105	Normal conditions	Original publication			DGGE of ITS2 & sequencing	Wicks 2012 Host tolerance, not symbiont tolerance, determinesthe distribution of coral species in relation to their environmentat a Central Pacific atoll	2007-06-01	6	2007	6	2007	Yes	spawner	hermaphrodite
8792	Acanthastrea echinata	ITS2	C3	25.9826	NA	Heron Island, GBR	Central Indo-Pacific	Northeast Australian Shelf	Central and Southern GBR	3	3	3	-23	152	Normal Cond	SymbioGBR			DGGE of ITS2 & sequencing	LaJeunesse 2003 LimnolOceanogr Low symbiont diversity in southern Great Barrier Reef	Feb-Mar 2002	2	2002	3	2002	No	spawner	hermaphrodite
17205	Acropora abrotanoides	ITS2	C3	25.9826	NA	Moorea	Eastern Indo-Pacific	Central Polynesia	Society Islands	7	7	7	-17.475	-149.837	Normal Conditions	Original Pub	HE579001	FR1	Cloning of ITS2 & sequencing	Putnam 2012 ProcRSocB Endosymbiotic flexibility associates with environ sensitivity	<6-2012	NA	NA	NA	NA	No	spawner	hermaphrodite
9432	Acropora aculeus	ITS2	C3	25.9826	NA	Pelorus Island, GBR	Central Indo-Pacific	Northeast Australian Shelf	Central and Southern GBR	NA	NA	NA	-18.5545	146.493	Normal Cond	Original pub		C3 ITS1 of van Oppen 2001 Proc R Soc Lond is equilivent to C3 ITS2 according to Tonk 2013 BMCEcol SymbioGBR	SSCP of ITS1	van Oppen 2001 ProcRSocB Patterns of coral–dinoflagellate associations in Acropora	1905-06-22	NA	2000	NA	2000	No	spawner	hermaphrodite
16119	Acropora acuminata	ITS2	C3	25.9826	NA	North Coral Gardens	Eastern Indo-Pacific	Central Polynesia	Line Islands	2-3	2	3	5.88286	-162.057	Normal conditions	Original publication			DGGE of ITS2 & sequencing	Wicks 2012 Host tolerance, not symbiont tolerance, determinesthe distribution of coral species in relation to their environmentat a Central Pacific atoll	2007-06-01	6	2007	6	2007	No	spawner	hermaphrodite
15131	Acropora anthocercis	ITS2	C3	25.9826	NA	Xiaodonghai Bay	Central Indo-Pacific	South China Sea	Gulf of Tonkin	1-10 m	1	10	18.2065	109.504	Normal conditions	Original pub			DGGE of ITS2 & sequencing	Zhou 2011 JSysEvol Low genetic diversity of symbiotic dinoflagellates	Oct '08	10	2008	10	2008	No	spawner	hermaphrodite
1344	Acropora aspera	ITS2	C3	25.9826	NA	Heron Island, GBR	Central Indo-Pacific	Northeast Australian Shelf	Central and Southern GBR		0.1	3	-23.44	151.91	Normal Cond	GenBank	AY624605	According to Dove 2004 MEPS & Tonk 2013 BMC Ecol.: C2 (van Oppen, ITS1) and C3 (LaJeunesse, ITS2) are the same subclade	Cloning of LSU & sequencing	Dove 2004 MEPS Scleractinian corals with photoprotective host pigments are hypersensitive to thermal bleaching		1	2002	1	2002	No	spawner	hermaphrodite
8794	Acropora austera	ITS2	C3	25.9826	NA	Heron Island, GBR	Central Indo-Pacific	Northeast Australian Shelf	Central and Southern GBR	3	3	3	-23	152	Normal Cond	Original pub			DGGE of ITS2 & sequencing	LaJeunesse 2003 LimnolOceanogr Low symbiont diversity in southern Great Barrier Reef	Feb-Mar 2002	2	2002	3	2002	No	spawner	hermaphrodite
8795	Acropora cerealis	ITS2	C3	25.9826	NA	Heron Island, GBR	Central Indo-Pacific	Northeast Australian Shelf	Central and Southern GBR	3	3	3	-23	152	Normal Cond	Original pub			DGGE of ITS2 & sequencing	LaJeunesse 2003 LimnolOceanogr Low symbiont diversity in southern Great Barrier Reef	Feb-Mar 2002	2	2002	3	2002	No	spawner	hermaphrodite
17906	Acropora clathrata	ITS2	C3	25.9826	NA	Saadiyat Reef	Western Indo-Pacific	Somali/Arabian	Arabian (Persian) Gulf	4	4	4	24.4743	54.3823	Normal Cond	Direct from Publication			Cloning of ITS2 & sequencing	Hume 2013 MarPollBull Corals from the Persian Gulf as models for thermotolerant	2010	NA	2010	NA	2010	No	spawner	hermaphrodite
3124	Acropora cytherea	ITS2	C3	25.9826	2	Heron Island, GBR	Central Indo-Pacific	Northeast Australian Shelf	Central and Southern GBR	10	10	10	-23	152	Normal Cond	Aquarist			DGGE of ITS2 & sequencing	LaJeunesse 2003 LimnolOceanogr Low symbiont diversity in southern Great Barrier Reef	Feb-Mar 2002	2	2002	3	2002	No	spawner	hermaphrodite
2960	Acropora digitifera	ITS2	C3	25.9826	NA	Zamami Island, Japan	Central Indo-Pacific	South Kuroshio	South Kuroshio	1-10	1	10	26.2346	127.305	Normal Cond	Aquarist			DGGE of ITS2 & sequencing	LaJeunesse 2004 MEPS Closely related Symbiodinium spp differ in relative dominance	March (2002)	3	2002	3	2002	No	spawner	hermaphrodite
9634	Acropora divaricata	ITS2	C3	25.9826	NA	Zamami Island, Japan	Central Indo-Pacific	South Kuroshio	South Kuroshio	1-10	1	10	26.2346	127.305	Normal Cond	Riddle 2011			DGGE of ITS2 & sequencing	LaJeunesse 2004 MEPS Closely related Symbiodinium spp differ in relative dominance	March (2002)	3	2002	3	2002	No	spawner	hermaphrodite
X63	Acropora elegans	ITS2	C3	25.9826	NA	Ribbon Reefs	Central Indo-Pacific	Northeast Australian Shelf	Torres Strait Northern Great Barrier Reef		46	70	-15.63	145.8	Normal Cond	Original pub			DGGE of ITS2 & sequencing	Bongaerts 2011 MEPS Symbiodinium diversity in mesophotic coral community	Sept-Oct 2007	9	2007	10	2007	No	spawner	hermaphrodite
16137	Acropora elseyi	ITS2	C3	25.9826	NA	North Coral Gardens	Eastern Indo-Pacific	Central Polynesia	Line Islands	2-3	2	3	5.88286	-162.057	Normal conditions	Original publication			DGGE of ITS2 & sequencing	Wicks 2012 Host tolerance, not symbiont tolerance, determinesthe distribution of coral species in relation to their environmentat a Central Pacific atoll	2007-06-01	6	2007	6	2007	No	spawner	hermaphrodite
9636	Acropora florida	ITS2	C3	25.9826	NA	Zamami Island, Japan	Central Indo-Pacific	South Kuroshio	South Kuroshio	1-10	1	10	26.2346	127.305	Normal Cond	Riddle 2011			DGGE of ITS2 & sequencing	LaJeunesse 2004 MEPS Closely related Symbiodinium spp differ in relative dominance	March (2002)	3	2002	3	2002	No	spawner	hermaphrodite
8798	Acropora gemmifera	ITS2	C3	25.9826	NA	Heron Island, GBR	Central Indo-Pacific	Northeast Australian Shelf	Central and Southern GBR	10	10	10	-23	152	Normal Cond	Original pub			DGGE of ITS2 & sequencing	LaJeunesse 2003 LimnolOceanogr Low symbiont diversity in southern Great Barrier Reef	Feb-Mar 2002	2	2002	3	2002	No	spawner	hermaphrodite
13348	Acropora glauca	ITS2	C3	25.9826	NA	Stephens Hole (Lord Howe Island)	Central Indo-Pacific	Lord Howe and Norfolk Islands	Lord Howe and Norfolk Islands	2-3	2	3	-31.5322	-159.504	Normal Conditions	Direct From Source			DGGE of ITS2 & sequencing	Wicks 2010 CoralReefs Local endemicity and high diversity characterise high-latitudecoral–Symbiodiniumpartnerships		1	2007	1	2007	no	spawner	hermaphrodite
9642	Acropora grandis	ITS2	C3	25.9826	NA	Rib Reef GBR	Central Indo-Pacific	Northeast Australian Shelf	Central and Southern Great Barrier Reef	1-6	1	6	-18.4781	146.871	Normal Cond	Riddle 2011			DGGE of ITS2 & sequencing	LaJeunesse 2004 MEPS Closely related Symbiodinium spp differ in relative dominance	May (2003)	5	2003	5	2003	No	spawner	hermaphrodite
16688	Acropora humilis	ITS2	C3	25.9826	NA	French Frigate Shoals	Eastern Indo-Pacific	Hawaii	Hawaii	10-20'	10	20	23.7592	-164.807	Normal Conditions	Original pub			Cloning of ITS2 & sequencing	Stat 2015 CoralReefs Geographic structure and host specificity	2005-2009	NA	2005	NA	2009	No	spawner	hermaphrodite
2969	Acropora hyacinthus	ITS2	C3	25.9826	NA	Curaçao Island	Central Indo-Pacific	Northeast Australian Shelf	Central and Southern Great Barrier Reef	1-6	1	6	-18.67	146.549	Normal Cond	Aquarist			DGGE of ITS2 & sequencing	LaJeunesse 2004 MEPS Closely related Symbiodinium spp differ in relative dominance	May (2003)	5	2003	5	2003	No	spawner	hermaphrodite
X64	Acropora intermedia	ITS2	C3	25.9826	NA	Xipai Island	Central Indo-Pacific	South China Sea	Gulf of Tonkin	1-10 m	1	10	18.2157	109.631	Normal conditions	Original pub			DGGE of ITS2 & sequencing	Zhou 2011 JSysEvol Low genetic diversity of symbiotic dinoflagellates	Oct '08	10	2008	10	2008	No	spawner	hermaphrodite
8800	Acropora latistella	ITS2	C3	25.9826	NA	Heron Island, GBR	Central Indo-Pacific	Northeast Australian Shelf	Central and Southern GBR	10	10	10	-23	152	Normal Cond	Original pub			DGGE of ITS2 & sequencing	LaJeunesse 2003 LimnolOceanogr Low symbiont diversity in southern Great Barrier Reef	Feb-Mar 2002	2	2002	3	2002	No	spawner	hermaphrodite
9645	Acropora listeri	ITS2	C3	25.9826	NA	Zamami Island, Japan	Central Indo-Pacific	South Kuroshio	South Kuroshio	1-10	1	10	26.2346	127.305	Normal Cond	Riddle 2011			DGGE of ITS2 & sequencing	LaJeunesse 2004 MEPS Closely related Symbiodinium spp differ in relative dominance	March (2002)	3	2002	3	2002	No	spawner	hermaphrodite
8801	Acropora longicyathus	ITS2	C3	25.9826	NA	Heron Island, GBR	Central Indo-Pacific	Northeast Australian Shelf	Central and Southern GBR	10	10	10	-23	152	Normal Cond	Original pub			DGGE of ITS2 & sequencing	LaJeunesse 2003 LimnolOceanogr Low symbiont diversity in southern Great Barrier Reef	Feb-Mar 2002	2	2002	3	2002	No	spawner	hermaphrodite
9646	Acropora loripes	ITS2	C3	25.9826	NA	Rib Reef GBR	Central Indo-Pacific	Northeast Australian Shelf	Central and Southern Great Barrier Reef	1-8	1	8	-18.4781	146.871	Normal Cond	Riddle 2011			DGGE of ITS2 & sequencing	LaJeunesse 2004 MEPS Closely related Symbiodinium spp differ in relative dominance	May (2003)	5	2003	5	2003	No	spawner	hermaphrodite
8949	Acropora lutkeni	ITS2	C3	25.9826	NA	Changuu	Western Indo-Pacific	Western Indian Ocean	East African Coral Coast	2-6	2	6	-6.12007	39.1681	Normal Cond	Geosymbio			DGGE of ITS2 & sequencing	LaJeunesse 2010 JBiogeograph Long-standing environmental conditions isolation and host–symbiont specificity	2007-04-01	4	2007	4	2007	No	spawner	hermaphrodite
8802	Acropora microclados	ITS2	C3	25.9826	NA	Heron Island, GBR	Central Indo-Pacific	Northeast Australian Shelf	Central and Southern GBR	10	10	10	-23	152	Normal Cond	Original pub			DGGE of ITS2 & sequencing	LaJeunesse 2003 LimnolOceanogr Low symbiont diversity in southern Great Barrier Reef	Feb-Mar 2002	2	2002	3	2002	No	spawner	hermaphrodite
9648	Acropora microphthalma	ITS2	C3	25.9826	NA	Zamami Island, Japan	Central Indo-Pacific	South Kuroshio	South Kuroshio	1-10	1	10	26.2346	127.305	Normal Cond	Riddle 2011			DGGE of ITS2 & sequencing	LaJeunesse 2004 MEPS Closely related Symbiodinium spp differ in relative dominance	March (2002)	3	2002	3	2002	No	spawner	hermaphrodite
3130	Acropora millepora	ITS2	C3	25.9826	8	Heron Island, GBR	Central Indo-Pacific	Northeast Australian Shelf	Central and Southern GBR	3	3	3	-23	152	Normal Cond	Aquarist			DGGE of ITS2 & sequencing	LaJeunesse 2003 LimnolOceanogr Low symbiont diversity in southern Great Barrier Reef	Feb-Mar 2002	2	2002	3	2002	No	spawner	hermaphrodite
3131	Acropora monticulosa	ITS2	C3	25.9826	9	Heron Island, GBR	Central Indo-Pacific	Northeast Australian Shelf	Central and Southern GBR	3	3	3	-23	152	Normal Cond	Aquarist			DGGE of ITS2 & sequencing	LaJeunesse 2003 LimnolOceanogr Low symbiont diversity in southern Great Barrier Reef	Feb-Mar 2002	2	2002	3	2002	No	spawner	hermaphrodite
9649	Acropora muricata	ITS2	C3	25.9826	NA	Rib Reef GBR	Central Indo-Pacific	Northeast Australian Shelf	Central and Southern Great Barrier Reef	1-8	1	8	-18.4781	146.871	Normal Cond	Riddle 2011			DGGE of ITS2 & sequencing	LaJeunesse 2004 MEPS Closely related Symbiodinium spp differ in relative dominance	March (2002)	3	2002	3	2002	NA	spawner	hermaphrodite
X65	Acropora nana	ITS2	C3	25.9826	NA	Kenting National Park, Taiwan	Central Indo-Pacific	South Kuroshio	South Kuroshio	< 5m	0	5	21.9317	120.746	Exposed to warm water outflow from nuclear power plant	Original Publication			DGGE of ITS2 & sequencing	Wang 2011 MEPS Photosystem II breakdown induced by reactiveoxygen species in freshly-isolated Symbiodiniumfrom Montipora(Scleractinia; Acroporidae)	Between October 2008 and June 2009	10	2008	6	2009	No	spawner	hermaphrodite
8803	Acropora nasuta	ITS2	C3	25.9826	NA	Heron Island, GBR	Central Indo-Pacific	Northeast Australian Shelf	Central and Southern GBR	10	10	10	-23	152	Normal Cond	Original pub			DGGE of ITS2 & sequencing	LaJeunesse 2003 LimnolOceanogr Low symbiont diversity in southern Great Barrier Reef	Feb-Mar 2002	2	2002	3	2002	No	spawner	hermaphrodite
19842	Acropora pulchra	ITS2	C3	25.9826	NA	Ofu Island, American Samoa	Eastern Indo-Pacific	Central Polynesia	Samoa Islands	1-3	1	3	-14.177	-169.652	Normal Cond	Aquarist	HQ631387	ITS1 C2	Direct sequencing of ITS1	Oliver 2011 CoralReefs Many corals host thermally resistant symbionts in high-temperature habit		3	2007	3	2007	No	spawner	hermaphrodite
9659	Acropora robusta	ITS2	C3	25.9826	NA	Zamami Island, Japan	Central Indo-Pacific	South Kuroshio	South Kuroshio	1-10	1	10	26.2346	127.305	Normal Cond	Riddle 2011			DGGE of ITS2 & sequencing	LaJeunesse 2004 MEPS Closely related Symbiodinium spp differ in relative dominance	March (2002)	3	2002	3	2002	No	spawner	hermaphrodite
9664	Acropora sarmentosa	ITS2	C3	25.9826	NA	Rib Reef GBR	Central Indo-Pacific	Northeast Australian Shelf	Central and Southern Great Barrier Reef	1-8	1	8	-18.4781	146.871	Normal Cond	Riddle 2011			DGGE of ITS2 & sequencing	LaJeunesse 2004 MEPS Closely related Symbiodinium spp differ in relative dominance	May (2003)	5	2003	5	2003	No	spawner	hermaphrodite
2465	Acropora secale	ITS2	C3	25.9826	NA	Banda Kuu	Western Indo-Pacific	Western Indian Ocean	East African Coral Coast	3-12	3	12	-5.73012	39.3035	Normal Cond	Geosymbio	AF499789		DGGE of ITS2 & sequencing	LaJeunesse 2010 JBiogeograph Long-standing environmental conditions isolation and host–symbiont specificity	2007-04-01	4	2007	4	2007	No	spawner	hermaphrodite
9665	Acropora selago	ITS2	C3	25.9826	NA	Zamami Island, Japan	Central Indo-Pacific	South Kuroshio	South Kuroshio	1-10	1	10	26.2346	127.305	Normal Cond	Riddle 2011			DGGE of ITS2 & sequencing	LaJeunesse 2004 MEPS Closely related Symbiodinium spp differ in relative dominance	March (2002)	3	2002	3	2002	No	spawner	hermaphrodite
9882	Acropora spathulata	ITS2	C3	25.9826	NA	Orpheus Island, GBR	Central Indo-Pacific	Northeast Australian Shelf	Central and Southern GBR	NA	NA	NA	-18.6061	146.491	Normal Cond	Original pub		ITS1 C2 converted to ITS2 C3	SSCP of ITS1	Abrego 2009 MolEcol Highly infectious symbiont dominates		NA	2003	NA	2006	NA	spawner	hermaphrodite
X66	Acropora striata	ITS2	C3	25.9826	NA	Moorea	Eastern Indo-Pacific	Central Polynesia	Society Islands	7	7	7	-17.5209	-149.921	Normal Conditions	Original Pub		FR1	Cloning of ITS2 & sequencing	Putnam 2012 ProcRSocB Endosymbiotic flexibility associates with environ sensitivity	<6-2012	NA	NA	NA	NA	No	spawner	hermaphrodite
9667	Acropora subglabra	ITS2	C3	25.9826	NA	Zamami Island, Japan	Central Indo-Pacific	South Kuroshio	South Kuroshio	1-10	1	10	26.2346	127.305	Normal Cond	Riddle 2011			DGGE of ITS2 & sequencing	LaJeunesse 2004 MEPS Closely related Symbiodinium spp differ in relative dominance	March (2002)	3	2002	3	2002	No	spawner	hermaphrodite
8807	Acropora subulata	ITS2	C3	25.9826	NA	Heron Island, GBR	Central Indo-Pacific	Northeast Australian Shelf	Central and Southern GBR	3	3	3	-23	152	Normal Cond	Original pub			DGGE of ITS2 & sequencing	LaJeunesse 2003 LimnolOceanogr Low symbiont diversity in southern Great Barrier Reef	Feb-Mar 2002	2	2002	3	2002	No	spawner	hermaphrodite
8981	Acropora tenuis	ITS2	C3	25.9826	NA	Changuu	Western Indo-Pacific	Western Indian Ocean	East African Coral Coast	2-6	2	6	-6.12007	39.1681	Normal Cond	Geosymbio			DGGE of ITS2 & sequencing	LaJeunesse 2010 JBiogeograph Long-standing environmental conditions isolation and host–symbiont specificity	2007-04-01	4	2007	4	2007	No	spawner	hermaphrodite
8810	Acropora valida	ITS2	C3	25.9826	NA	Heron Island	Central Indo-Pacific	Northeast Australian Shelf	Central and Southern GBR	3	3	3	-23	152	Normal Cond	Original pub			DGGE of ITS2 & sequencing	LaJeunesse 2003 LimnolOceanogr Low symbiont diversity in southern Great Barrier Reef	Feb and March 2002	2	2002	3	2002	No	spawner	hermaphrodite
9679	Acropora yongei	ITS2	C3	25.9826	NA	Feather Reef GBR	Central Indo-Pacific	Northeast Australian Shelf	Central and Southern Great Barrier Reef	1–8	1	8	-18	146	Normal Cond	Riddle 2011			DGGE of ITS2 & sequencing	LaJeunesse 2004 MEPS Closely related Symbiodinium spp differ in relative dominance	May (2003)	5	2003	5	2003	No	spawner	hermaphrodite
1480	Agaricia agaricites	ITS2	C3	25.9826	NA	Barbados	Tropical Atlantic	Tropical Northwestern Atlantic	Eastern Caribbean	>10	10	30	13.07	-60	Normal Cond	Original pub	same_as_AF499789		DGGE of ITS2 & sequencing	Finney 2010 MicrobEcol The Relative Significance of Host–Habitat	Jul 02 -Aug 03	7	2002	8	2003	Yes	brooder	gonochore
1498	Agaricia fragilis	ITS2	C3	25.9826	NA	Belize	Tropical Atlantic	Tropical Northwestern Atlantic	Western Caribbean	>10	10	30	17	-88	Normal Cond	Original pub	same_as_AF499789		DGGE of ITS2 & sequencing	Finney 2010 MicrobEcol The Relative Significance of Host–Habitat	Jul 02 -Aug 03	7	2002	8	2003	NA	brooder	gonochore
10523	Agaricia grahamae	ITS2	C3	25.9826	60m-Agra-DC5885	Curaçao	Tropical Atlantic	Tropical Northwestern Atlantic	Southern Caribbean	60	60	60	12.1252	-68.9742	Normal Conditions	Original publication		Collected from Bongaerts 2015 RoySocOpenSci	DGGE of ITS2 & sequencing	Bongaerts 2013 BMCEvolBiol Sharing the slope depth partitioning of agariciid corals		NA	2013	NA	2013	NA	NA	NA
10527	Agaricia humilis	ITS2	C3	25.9826	2m-Ahum-01	Curaçao	Tropical Atlantic	Tropical Northwestern Atlantic	Southern Caribbean	2	2	2	12.1252	-68.9742	Normal Conditions	Original publication		Collected from Bongaerts 2015 RoySocOpenSci	DGGE of ITS2 & sequencing	Bongaerts 2013 BMCEvolBiol Sharing the slope depth partitioning of agariciid corals		NA	2009	NA	2009	yes	brooder	gonochore
10740	Agaricia lamarcki	ITS2	C3	25.9826	10m-Alam-X01	Curaçao	Tropical Atlantic	Tropical Northwestern Atlantic	Southern Caribbean	10	10	10	12.1252	-68.9742	Normal Conditions	Original publication		Collected from Bongaerts 2015 RoySocOpenSci	DGGE of ITS2 & sequencing	Bongaerts 2013 BMCEvolBiol Sharing the slope depth partitioning of agariciid corals		NA	2004	NA	2004	NA	brooder	NA
18044	Agaricia tenuifolia	ITS2	C3	25.9826	NA	National Natural Park Rosario and San Bernardo Corals, Columbia	Tropical Atlantic	Tropical Northwestern Atlantic	Southwestern Caribbean	8-36	8	36	10.25	-75.78	Normal	GeoSymbio			SSU-RFLP, ITS2-DGGE & sequencing	Camargo 2009 BiodiversConserv Community involvement in management for maintaining coral reef resilience		5	2006	9	2006	Yes	brooder	NA
9261	Agaricia undata	ITS2	C3	25.9826	NA	Belize	Tropical Atlantic	Tropical Northwestern Atlantic	Western Caribbean	>10	10	30	17	-88	Normal Cond	Original pub			DGGE of ITS2 & sequencing	Finney 2010 MicrobEcol The Relative Significance of Host–Habitat	Jul 02 -Aug 03	7	2002	8	2003	NA	brooder	NA
8811	Astrea curta	ITS2	C3	25.9826	NA	Heron Island	Central Indo-Pacific	Northeast Australian Shelf	Central and Southern GBR	10	10	10	-23	152	Normal Cond	Original pub			DGGE of ITS2 & sequencing	LaJeunesse 2003 LimnolOceanogr Low symbiont diversity in southern Great Barrier Reef	Feb and March 2002	2	2002	3	2002	No	spawner	hermaphrodite
3150	Coelastrea aspera	ITS2	C3	25.9826	28	Heron Island, GBR	Central Indo-Pacific	Northeast Australian Shelf	Central and Southern GBR	10	10	10	-23	152	Normal Cond	Aquarist			DGGE of ITS2 & sequencing	LaJeunesse 2003 LimnolOceanogr Low symbiont diversity in southern Great Barrier Reef	Feb-Mar 2002	2	2002	3	2002	No	spawner	hermaphrodite
11303	Colpophyllia natans	ITS2	C3	25.9826	25m-Cnat-18	Curaçao	Tropical Atlantic	Tropical Northwestern Atlantic	Southern Caribbean	25	25	25	12.1252	-68.9742	Normal Conditions	Original publication			DGGE of ITS2 & sequencing	Bongaerts 2015 RoySocOpenSci Prevalent endosymbiont zoantion		11	2009	11	2009	No	spawner	hermaphrodite
16115	Coscinaraea monile	ITS2	C3	25.9826	NA	Vohemar	Western Indo-Pacific	Western Indian Ocean	Western and Northern Madagascar		1	30	-13.4	50	Normal conditions	Original publication		collected at SCUBA depths	DGGE of ITS2 & sequencing	Boonstra 2011 Diss Latitudinal Patterns in the Distribution of Algal Symbionts		9	2001	9	2001	No	spawner	gonochore
17869	Cyphastrea microphthalma	ITS2	C3	25.9826	NA	Saadiyat Reef	Western Indo-Pacific	Somali/Arabian	Arabian (Persian) Gulf	4	4	4	24.4743	54.3823	Normal Cond	Direct from Publication			Cloning of ITS2 & sequencing	Hume 2013 MarPollBull Corals from the Persian Gulf as models for thermotolerant	October 2011	8	2011	8	2011	No	spawner	hermaphrodite
16709	Cyphastrea ocellina	ITS2	C3	25.9826	NA	French Frigate Shoals	Eastern Indo-Pacific	Hawaii	Hawaii	10-20'	10	20	23.7592	-164.807	Normal Conditions	Original pub			Cloning of ITS2 & sequencing	Stat 2015 CoralReefs Geographic structure and host specificity	2005-2009	NA	2005	NA	2009	yes	brooder	hermaphrodite
9694	Cyphastrea serailia	ITS2	C3	25.9826	NA	Feather Reef GBR	Central Indo-Pacific	Northeast Australian Shelf	Central and Southern Great Barrier Reef	10–17	10	17	-17.5083	146.377	Normal Cond	Riddle 2011			DGGE of ITS2 & sequencing	LaJeunesse 2004 MEPS Closely related Symbiodinium spp differ in relative dominance	May (2003)	5	2003	5	2003	No	spawner	hermaphrodite
2984	Diploastrea heliopora	ITS2	C3	25.9826	NA	Rib Reef GBR	Central Indo-Pacific	Northeast Australian Shelf	Central and Southern Great Barrier Reef	10-17	10	17	-18.4781	146.871	Normal Cond	Aquarist			DGGE of ITS2 & sequencing	LaJeunesse 2004 MEPS Closely related Symbiodinium spp differ in relative dominance	May (2003)	5	2003	5	2003	No	spawner	gonochore
9286	Diploria labyrinthiformis	ITS2	C3	25.9826	NA	Barbados	Tropical Atlantic	Tropical Northwestern Atlantic	Eastern Caribbean	>10	10	30	13.07	-60	Normal Cond	Original pub			DGGE of ITS2 & sequencing	Finney 2010 MicrobEcol The Relative Significance of Host–Habitat	Jul 02 -Aug 03	7	2002	8	2003	No	spawner	hermaphrodite
11401	Diploria strigosa	ITS2	C3	25.9826	05m-Dstr-21	Curaçao	Tropical Atlantic	Tropical Northwestern Atlantic	Southern Caribbean	5	5	5	12.1252	-68.9742	Normal Conditions	Original publication			DGGE of ITS2 & sequencing	Bongaerts 2015 RoySocOpenSci Prevalent endosymbiont zoantion		11	2009	11	2009	No	spawner	hermaphrodite
9697	Dipsastraea matthaii	ITS2	C3	25.9826	NA	Zamami Island, Japan	Central Indo-Pacific	South Kuroshio	South Kuroshio	1-10	1	10	26.2346	127.305	Normal Cond	Riddle 2011			DGGE of ITS2 & sequencing	LaJeunesse 2004 MEPS Closely related Symbiodinium spp differ in relative dominance	March (2002)	3	2002	3	2002	NA	spawner	hermaphrodite
17975	Dipsastraea pallida	ITS2	C3	25.9826	NA	Saadiyat reef (Abu Dhabi)	Western Indo-Pacific	Somali/Arabian	Arabian (Persian) Gulf		5	7	24.4743	54.3823	Normal Cond	Direct from Pub		Colony 3	Cloning of DGGE isolated ITS2 & sequencing	Hume 2015 Sci Report Symbiodinium thermophilum	2012-11-25	11	2012	11	2012	NA	spawner	hermaphrodite
8817	Dipsastraea rotumana	ITS2	C3	25.9826	NA	Heron Island	Central Indo-Pacific	Northeast Australian Shelf	Central and Southern GBR	3	3	3	-23	152	Normal Cond	Original pub			DGGE of ITS2 & sequencing	LaJeunesse 2003 LimnolOceanogr Low symbiont diversity in southern Great Barrier Reef	Feb and March 2002	2	2002	3	2002	NA	spawner	hermaphrodite
15151	Dipsastraea speciosa	ITS2	C3	25.9826	NA	Xiaodonghai Bay	Central Indo-Pacific	South China Sea	Gulf of Tonkin	1-10 m	1	10	18.2065	109.504	Normal conditions	Original pub			DGGE of ITS2 & sequencing	Zhou 2011 JSysEvol Low genetic diversity of symbiotic dinoflagellates	Oct '08	10	2008	10	2008	NA	spawner	hermaphrodite
X67	Dipsastraea veroni	ITS2	C3	25.9826	NA	Xipai Island	Central Indo-Pacific	South China Sea	Gulf of Tonkin	1-10 m	1	10	18.2157	109.631	Normal conditions	Original pub			DGGE of ITS2 & sequencing	Zhou 2011 JSysEvol Low genetic diversity of symbiotic dinoflagellates	Oct '08	10	2008	10	2008	No	spawner	hermaphrodite
8333	Echinophyllia aspera	ITS2	C3	25.9826	NA	Zanzibar	Western Indo-Pacific	Western Indian Ocean	East African Coral Coast		1	7	-6.15262	39.136	Normal Cond	Direct from publication			DGGE of ITS2 & sequencing	Chauka 2012 WIndOceaJMarSci Diversity of Symbiodinium in Tanzania		4	2008	4	2008	No	spawner	hermaphrodite
2988	Echinopora gemmacea	ITS2	C3	25.9826	NA	Feather Reef GBR	Central Indo-Pacific	Northeast Australian Shelf	Central and Southern Great Barrier Reef	1-8	1	8	-17.5083	146.377	Normal Cond	Aquarist			DGGE of ITS2 & sequencing	LaJeunesse 2004 MEPS Closely related Symbiodinium spp differ in relative dominance	May (2003)	5	2003	5	2003	No	spawner	hermaphrodite
X68	Echinopora hirsutissima	ITS2	C3	25.9826	NA	Vohemar	Western Indo-Pacific	Western Indian Ocean	Western and Northern Madagascar		1	30	-13.4	50	Normal conditions	Original publication		collected at SCUBA depths	DGGE of ITS2 & sequencing	Boonstra 2011 Diss Latitudinal Patterns in the Distribution of Algal Symbionts		9	2001	9	2001	No	spawner	hermaphrodite
9703	Echinopora lamellosa	ITS2	C3	25.9826	NA	Rib Reef GBR	Central Indo-Pacific	Northeast Australian Shelf	Central and Southern Great Barrier Reef	1-8'	1	8	-18	147	Normal Cond	Riddle 2011			DGGE of ITS2 & sequencing	LaJeunesse 2004 MEPS Closely related Symbiodinium spp differ in relative dominance	May (2003)	5	2003	5	2003	No	spawner	hermaphrodite
9707	Echinopora mammiformis	ITS2	C3	25.9826	NA	Rib Reef GBR	Central Indo-Pacific	Northeast Australian Shelf	Central and Southern Great Barrier Reef	1-8'	1	8	-18	147	Normal Cond	Riddle 2011			DGGE of ITS2 & sequencing	LaJeunesse 2004 MEPS Closely related Symbiodinium spp differ in relative dominance	May (2003)	5	2003	5	2003	No	spawner	hermaphrodite
9708	Echinopora pacificus	ITS2	C3	25.9826	NA	Zamami Island, Japan	Central Indo-Pacific	South Kuroshio	South Kuroshio	1-10	1	10	26.2346	127.305	Normal Cond	Riddle 2011			DGGE of ITS2 & sequencing	LaJeunesse 2004 MEPS Closely related Symbiodinium spp differ in relative dominance	March (2002)	3	2002	3	2002	No	spawner	hermaphrodite
1551	Favia fragum	ITS2	C3	25.9826	NA	Barbados	Tropical Atlantic	Tropical Northwestern Atlantic	Eastern Caribbean	1-5	1	5	13.07	-60	Normal Cond	Original pub	same_as_AF499789		DGGE of ITS2 & sequencing	Finney 2010 MicrobEcol The Relative Significance of Host–Habitat	Jul 02 -Aug 03	7	2002	8	2003	Yes	brooder	hermaphrodite
3141	Favites abdita	ITS2	C3	25.9826	19	Heron Island, GBR	Central Indo-Pacific	Northeast Australian Shelf	Central and Southern GBR	3-10	3	10	-23	152	Normal Cond	Aquarist			DGGE of ITS2 & sequencing	LaJeunesse 2003 LimnolOceanogr Low symbiont diversity in southern Great Barrier Reef	Feb-Mar 2002	2	2002	3	2002	No	spawner	hermaphrodite
8822	Favites complanata	ITS2	C3	25.9826	NA	Heron Island	Central Indo-Pacific	Northeast Australian Shelf	Central and Southern GBR	3	3	3	-23	152	Normal Cond	Original pub			DGGE of ITS2 & sequencing	LaJeunesse 2003 LimnolOceanogr Low symbiont diversity in southern Great Barrier Reef	Feb and March 2002	2	2002	3	2002	No	spawner	hermaphrodite
9709	Favites valenciennesi	ITS2	C3	25.9826	NA	Rib Reef GBR	Central Indo-Pacific	Northeast Australian Shelf	Central and Southern Great Barrier Reef	10-17'	10	17	-18	147	Normal Cond	Riddle 2011			DGGE of ITS2 & sequencing	LaJeunesse 2004 MEPS Closely related Symbiodinium spp differ in relative dominance	May (2003)	5	2003	5	2003	no	spawner	hermaphrodite
15364	Galaxea astreata	ITS2	C3	25.9826	NA	Hydrographers Passage	Central Indo-Pacific	Northeast Australian Shelf	Torres Strait Northern Great Barrier Reef		54	55	-20.2	150.4	Normal Cond	Original pub			DGGE of ITS2 & sequencing	Bongaerts 2011 MEPS Symbiodinium diversity in mesophotic coral community	Sept-Oct 2007	9	2007	10	2007	No	spawner	Mixed
15699	Galaxea fascicularis	ITS2	C3	25.9826	NA	Nosy Bé	Western Indo-Pacific	Western Indian Ocean	Western and Northern Madagascar		1	30	-13.4	48	Normal conditions	Original publication		collected at SCUBA depths	DGGE of ITS2 & sequencing	Boonstra 2011 Diss Latitudinal Patterns in the Distribution of Algal Symbionts		3	2007	3	2007	No	spawner	gonochore
17342	Gardineroseris planulata	ITS2	C3	25.9826	NA	Moorea	Eastern Indo-Pacific	Central Polynesia	Society Islands	1	1	1	-17.5209	-149.921	Normal Conditions	Original Pub	HE579001	LG6	Cloning of ITS2 & sequencing	Putnam 2012 ProcRSocB Endosymbiotic flexibility associates with environ sensitivity	<6-2012	NA	NA	NA	NA	no	spawner	gonochore
8826	Goniastrea australensis	ITS2	C3	25.9826	NA	Heron Island	Central Indo-Pacific	Northeast Australian Shelf	Central and Southern GBR	3	3	3	-23	152	Normal Cond	Original pub			DGGE of ITS2 & sequencing	LaJeunesse 2003 LimnolOceanogr Low symbiont diversity in southern Great Barrier Reef	Feb and March 2002	2	2002	3	2002	No	spawner	hermaphrodite
9716	Goniastrea edwardsi	ITS2	C3	25.9826	NA	Feather Reef GBR	Central Indo-Pacific	Northeast Australian Shelf	Central and Southern Great Barrier Reef	1-8'	1	8	-18	146	Normal Cond	Riddle 2011			DGGE of ITS2 & sequencing	LaJeunesse 2004 MEPS Closely related Symbiodinium spp differ in relative dominance	May (2003)	5	2003	5	2003	No	spawner	hermaphrodite
13282	Goniastrea favulus	ITS2	C3	25.9826	NA	Heron Reef, GBR	Central Indo-Pacific	Northeast Australian Shelf	Central and Southern GBR	Intertidal flat	0	1	-23.4167	151.917	Normal Cond	SymbioGBR	EF372063	Clsu3 converts to ITS2 C3	SSCP of LUS & cloning, DGGE of ITS2 & sequencing	Stat 2008 CoralReefs Symbiont acquisition strategy drives the genetic diversity of Symbiodinium in hosts	2001-08-01	8	2001	8	2001	No	spawner	hermaphrodite
9718	Goniastrea pectinata	ITS2	C3	25.9826	NA	Rib Reef GBR	Central Indo-Pacific	Northeast Australian Shelf	Central and Southern Great Barrier Reef	10-17'	10	17	-18	147	Normal Cond	Riddle 2011			DGGE of ITS2 & sequencing	LaJeunesse 2004 MEPS Closely related Symbiodinium spp differ in relative dominance	May (2003)	5	2003	5	2003	No	spawner	hermaphrodite
16070	Goniastrea retiformis	ITS2	C3	25.9826	NA	Vohemar	Western Indo-Pacific	Western Indian Ocean	Western and Northern Madagascar		1	30	-13.4	50	Normal conditions	Original publication		collected at SCUBA depths	DGGE of ITS2 & sequencing	Boonstra 2011 Diss Latitudinal Patterns in the Distribution of Algal Symbionts		9	2001	9	2001	No	spawner	hermaphrodite
8829	Goniastrea stelligera	ITS2	C3	25.9826	NA	Heron Island	Central Indo-Pacific	Northeast Australian Shelf	Central and Southern GBR	3	3	3	-23	152	Normal Cond	Original pub			DGGE of ITS2 & sequencing	LaJeunesse 2003 LimnolOceanogr Low symbiont diversity in southern Great Barrier Reef	Feb and March 2002	2	2002	3	2002	NA	spawner	hermaphrodite
X69	Goniopora planulata	ITS2	C3	25.9826	NA	Ximao Island (Xidao on Google Maps)	Central Indo-Pacific	South China Sea	Gulf of Tonkin	1-10 m	1	10	18.2353	109.374	Normal conditions	Original pub			DGGE of ITS2 & sequencing	Zhou 2011 JSysEvol Low genetic diversity of symbiotic dinoflagellates	Oct '08	10	2008	10	2008	No	spawner	gonochore
17365	Herpolitha limax	ITS2	C3	25.9826	NA	Moorea	Eastern Indo-Pacific	Central Polynesia	Society Islands	8	8	8	-17.475	-149.837	Normal Conditions	Original Pub	HE579001	FR1	Cloning of ITS2 & sequencing	Putnam 2012 ProcRSocB Endosymbiotic flexibility associates with environ sensitivity	<6-2012	NA	NA	NA	NA	No	spawner	gonochore
2586	Hydnophora exesa	ITS2	C3	25.9826	NA	Banda Kuu	Western Indo-Pacific	Western Indian Ocean	East African Coral Coast	3-12	3	12	-5.73012	39.3035	Normal Cond	Geosymbio	same_as_AF499789		DGGE of ITS2 & sequencing	LaJeunesse 2010 JBiogeograph Long-standing environmental conditions isolation and host–symbiont specificity	2007-04-01	4	2007	4	2007	No	spawner	hermaphrodite
8830	Hydnophora microconos	ITS2	C3	25.9826	NA	Heron Island	Central Indo-Pacific	Northeast Australian Shelf	Central and Southern GBR	3	3	3	-23	152	Normal Cond	Original pub			DGGE of ITS2 & sequencing	LaJeunesse 2003 LimnolOceanogr Low symbiont diversity in southern Great Barrier Reef	Feb and March 2002	2	2002	3	2002	No	spawner	hermaphrodite
8873	Isophyllia rigida	ITS2	C3	25.9826	NA	Puerto Morelos, Yucatan, Mexico	Tropical Atlantic	Tropical Northwestern Atlantic	Southern Gulf of Mexico	5	5	5	21	-87	Normal Cond	Riddle 2011	NA		DGGE of ITS2 & sequencing	LaJeunesse 2002 MarBiol Diversity and community structure of symbiotic dinoflagellates	Aug 1998, Sep 1999	8	1998	9	1999	NA	brooder	NA
9564	Isophyllia sinuosa	ITS2	C3	25.9826	NA	Puerto Morelos, Quintana Roo, Yucatan, Mexico	Tropical Atlantic	Tropical Northwestern Atlantic	Southern Gulf of Mexico	1	1	1	21	-87	Normal Conditions	Riddle 2011			DGGE of ITS2 & sequencing	Banaszak 2006 JExptMarBiolEcol The distribution of mycosporine-like amino acids	<5/2006	NA	NA	NA	NA	Yes	brooder	gonochore
13336	Isopora cuneata	ITS2	C3	25.9826	NA	Middle Beach (Lord Howe Island)	Central Indo-Pacific	Lord Howe and Norfolk Islands	Lord Howe and Norfolk Islands	15	15	15	-31.5231	-159.677	Normal Conditions	Direct From Source		Listed as Acropora cuneata	DGGE of ITS2 & sequencing	Wicks 2010 CoralReefs Local endemicity and high diversity characterise high-latitudecoral–Symbiodiniumpartnerships		1	2007	1	2007	NA	brooder	hermaphrodite
3132	Isopora palifera	ITS2	C3	25.9826	10	Heron Island, GBR	Central Indo-Pacific	Northeast Australian Shelf	Central and Southern GBR	3	3	3	-23	152	Normal Cond	Aquarist			DGGE of ITS2 & sequencing	LaJeunesse 2003 LimnolOceanogr Low symbiont diversity in southern Great Barrier Reef	Feb-Mar 2002	2	2002	3	2002	No	brooder	hermaphrodite
17370	Leptastrea purpurea	ITS2	C3	25.9826	NA	Moorea	Eastern Indo-Pacific	Central Polynesia	Society Islands	7	7	7	-17.5146	-149.762	Normal Conditions	Original Pub	HE579001	FR3	Cloning of ITS2 & sequencing	Putnam 2012 ProcRSocB Endosymbiotic flexibility associates with environ sensitivity	<6-2012	NA	NA	NA	NA	No	spawner	gonochore
17390	Leptastrea transversa	ITS2	C3	25.9826	NA	Moorea	Eastern Indo-Pacific	Central Polynesia	Society Islands	7	7	7	-17.5146	-149.762	Normal Conditions	Original Pub	HE579001	FR3	Cloning of ITS2 & sequencing	Putnam 2012 ProcRSocB Endosymbiotic flexibility associates with environ sensitivity	<6-2012	NA	NA	NA	NA	NA	spawner	gonochore
3151	Leptoria phrygia	ITS2	C3	25.9826	29	Heron Island, GBR	Central Indo-Pacific	Northeast Australian Shelf	Central and Southern GBR	10	10	10	-23	152	Normal Cond	Aquarist			DGGE of ITS2 & sequencing	LaJeunesse 2003 LimnolOceanogr Low symbiont diversity in southern Great Barrier Reef	Feb-Mar 2002	2	2002	3	2002	No	spawner	hermaphrodite
2939	Leptoseris cucullata	ITS2	C3	25.9826	NA	Puerto Morelos, Yucatan, Mexico	Tropical Atlantic	Tropical Northwestern Atlantic	Southern Gulf of Mexico	10	10	10	21	-87	Normal Cond	Aquarist			DGGE of ITS2 & sequencing	LaJeunesse 2002 MarBiol Diversity and community structure of symbiotic dinoflagellates		8	1998	9	1999	NA	brooder	NA
X70	Leptoseris hawaiiensis	ITS2	C3	25.9826	NA	Ribbon Reefs	Central Indo-Pacific	Northeast Australian Shelf	Torres Strait Northern Great Barrier Reef		46	70	-15.63	145.8	Normal Cond	Original pub			DGGE of ITS2 & sequencing	Bongaerts 2011 MEPS Symbiodinium diversity in mesophotic coral community	Sept-Oct 2007	9	2007	10	2007	No	spawner	gonochore
X71	Leptoseris mycetoseroides	ITS2	C3	25.9826	NA	Moorea	Eastern Indo-Pacific	Central Polynesia	Society Islands	22	22	22	-17.5209	-149.921	Normal Conditions	Original Pub		FR3	Cloning of ITS2 & sequencing	Putnam 2012 ProcRSocB Endosymbiotic flexibility associates with environ sensitivity	<6-2012	NA	NA	NA	NA	NA	NA	NA
14461	Lobactis scutaria	ITS2	C3	25.9826	NA	Johnston Atoll, Hawaii	Eastern Indo-Pacific	Hawaii	Hawaii	3-7	3	7	18.078	-169.533	Normal Cond	Original publication	AF499789		Cloning of ITS2 & sequencing	Stat 2009 MEPS Specificity in communities of Symbiodinium in corals from Johnston Atoll	June '06	6	2006	6	2006	no	spawner	gonochore
8833	Lobophyllia corymbosa	ITS2	C3	25.9826	NA	Heron Island	Central Indo-Pacific	Northeast Australian Shelf	Central and Southern GBR	3	3	3	-23	152	Normal Cond	Original pub			DGGE of ITS2 & sequencing	LaJeunesse 2003 LimnolOceanogr Low symbiont diversity in southern Great Barrier Reef	Feb and March 2002	2	2002	3	2002	No	spawner	hermaphrodite
3018	Lobophyllia hemprichii	ITS2	C3	25.9826	NA	Rib Reef GBR	Central Indo-Pacific	Northeast Australian Shelf	Central and Southern Great Barrier Reef	10-17'	10	17	-18	147	Normal Cond	Aquarist			DGGE of ITS2 & sequencing	LaJeunesse 2004 MEPS Closely related Symbiodinium spp differ in relative dominance	May (2003)	5	2003	5	2003	No	spawner	hermaphrodite
786	Meandrina meandrites	ITS2	C3	25.9826	NA	National Natural Park Rosario and San Bernardo Corals, Columbia	Tropical Atlantic	Tropical Northwestern Atlantic	Southwestern Caribbean	8-22m	8	23	10.25	-75.78	Normal	GeoSymbio	same_as_AF499789		SSU-RFLP, ITS2-DGGE & sequencing	Camargo 2009 BiodiversConserv Community involvement in management for maintaining coral reef resilience		5	2006	9	2006	No	spawner	Mixed
8837	Merulina ampliata	ITS2	C3	25.9826	NA	Heron Island	Central Indo-Pacific	Northeast Australian Shelf	Central and Southern GBR	3	3	3	-23	152	Normal Cond	Original pub			DGGE of ITS2 & sequencing	LaJeunesse 2003 LimnolOceanogr Low symbiont diversity in southern Great Barrier Reef	Feb and March 2002	2	2002	3	2002	No	spawner	hermaphrodite
2859	Montastraea cavernosa	ITS2	C3	25.9826	NA	Barbados, Caribbean	Tropical Atlantic	Tropical Northwestern Atlantic	Eastern Caribbean		1	5	13.192	-59.64	Normal Cond	Geosymbio	same_as_AF499789		DGGE of ITS2 & sequencing	LaJeunesse 2009 ProcRSocB Outbreak and persistence of opportunistic Zoox during 2005 Caribbean bleaching		7	2005	8	2005	No	spawner	gonochore
15279.1	Montipora aequituberculata	ITS2	C3	25.9826	NA	Nelly Bay, Magnetic Island, GBR	Central Indo-Pacific	Northeast Australian Shelf	Central and Southern GBR	NA	NA	NA	-19.2	146.9	Normal Cond	Original pub		ITS1, C2 (converted to ITS2 C3)	SSCP of ITS1, cloning & sequencing	van Oppen 2004 MarBiol Mode of zooxanthella transmission does not affect zooxanthella diversity	1905-06-25	NA	2003	NA	2003	Yes	spawner	hermaphrodite
17011	Montipora capitata	ITS2	C3	25.9826	NA	Kure	Eastern Indo-Pacific	Hawaii	Hawaii	10-20'	10	20	28.5108	-178.51	Normal Conditions	Original pub			Cloning of ITS2 & sequencing	Stat 2015 CoralReefs Geographic structure and host specificity	2005-2009	NA	2005	NA	2009	Yes	spawner	hermaphrodite
15296	Montipora danae	ITS2	C3	25.9826	NA	Irian Jaya, Indonesia	Central Indo-Pacific	Western Coral Triangle	Papua	NA	NA	NA	-1.61	133.1	Normal Cond	Original pub		ITS1, C2 (converted to ITS2 C3)	SSCP of ITS1, cloning & sequencing	van Oppen 2004 MarBiol Mode of zooxanthella transmission does not affect zooxanthella diversity	1905-06-25	NA	2003	NA	2003	Yes	spawner	hermaphrodite
19892	Montipora digitata	ITS2	C3	25.9826	NA	Heron Island, GBR	Central Indo-Pacific	Northeast Australian Shelf	Central and Southern GBR	0-1m	0	1	-23.43	151.9	Normal Conditions	SymbioGBR	HM031106	Experimentally induced bleaching conditions, however molecular ID was determined before experiment	SSCP of ITS2 & sequencing	Fisher 2012 CoralReefs The effect of temperature stress on coral-Symbiodinium associations		12	2002	12	2002	Yes	spawner	hermaphrodite
17412	Montipora hispida	ITS2	C3	25.9826	NA	Moorea	Eastern Indo-Pacific	Central Polynesia	Society Islands	2	2	2	-17.579	-149.864	Normal Conditions	Original Pub	HE579001	FG5	Cloning of ITS2 & sequencing	Putnam 2012 ProcRSocB Endosymbiotic flexibility associates with environ sensitivity	<6-2012	NA	NA	NA	NA	Yes	spawner	hermaphrodite
3026	Mycedium elephantotus	ITS2	C3	25.9826	NA	Feather Reef GBR	Central Indo-Pacific	Northeast Australian Shelf	Central and Southern Great Barrier Reef	10-17'	10	17	-18	146	Normal Cond	Aquarist			DGGE of ITS2 & sequencing	LaJeunesse 2004 MEPS Closely related Symbiodinium spp differ in relative dominance	May (2003)	5	2003	5	2003	No	spawner	hermaphrodite
9565	Mycetophyllia lamarckiana	ITS2	C3	25.9826	NA	Puerto Morelos, Quintana Roo, Yucatan, Mexico	Tropical Atlantic	Tropical Northwestern Atlantic	Southern Gulf of Mexico	7	7	7	21	-87	Normal Conditions	Riddle 2011			DGGE of ITS2 & sequencing	Banaszak 2006 JExptMarBiolEcol The distribution of mycosporine-like amino acids	<5/2006	NA	NA	NA	NA	NA	brooder	hermaphrodite
8890	Orbicella annularis	ITS2	C3	25.9826	1	Lee Stocking Island, Bahamas	Tropical Atlantic	Tropical Northwestern Atlantic	Bahamian	4	4	4	24	-76	Normal Cond	Riddle 2011	NA		DGGE of ITS2 & sequencing	LaJeunesse 2002 MarBiol Diversity and community structure of symbiotic dinoflagellates	Aug 1998, Sep 1999	8	1998	9	1999	No	spawner	hermaphrodite
17938	Orbicella faveolata	ITS2	C3	25.9826	NA	Upper Florida Keys	Tropical Atlantic	Tropical Northwestern Atlantic	Floridian	8-12	8	12	25	-80	Normal conditions	Original publication			DGGE of ITS2 & sequencing	Kemp 2015 CoralReefs	2006–2008	NA	2006	NA	2008	No	spawner	hermaphrodite
6338	Orbicella franksi	ITS2	C3	25.9826	NA	Lee Stocking Island	Tropical Atlantic	Tropical Northwestern Atlantic	Bahamian	12	12	12	24.25	-76.5	Normal conditions	GeoSymbio		Alligator	DGGE of ITS2	Thornhill 2006 MarBiol Multi-year seasonal genotypic surveys of coral-algal symbioses		11	2002	11	2002	No	spawner	hermaphrodite
17427	Pachyseris speciosa	ITS2	C3	25.9826	NA	Moorea	Eastern Indo-Pacific	Central Polynesia	Society Islands	20	20	20	-17.4828	-149.857	Normal Conditions	Original Pub	HE579001	RG	Cloning of ITS2 & sequencing	Putnam 2012 ProcRSocB Endosymbiotic flexibility associates with environ sensitivity	<6-2012	NA	NA	NA	NA	no	spawner	gonochore
X72	Paramontastraea serageldini	ITS2	C3	25.9826	NA	Vohemar	Western Indo-Pacific	Western Indian Ocean	Western and Northern Madagascar		1	30	-13.4	50	Normal conditions	Original publication		collected at SCUBA depths	DGGE of ITS2 & sequencing	Boonstra 2011 Diss Latitudinal Patterns in the Distribution of Algal Symbionts		9	2001	9	2001	NA	NA	NA
17434	Pavona cactus	ITS2	C3	25.9826	NA	Moorea	Eastern Indo-Pacific	Central Polynesia	Society Islands	4	4	4	-17.485	-149.834	Normal Conditions	Original Pub	HE579001	FG2	Cloning of ITS2 & sequencing	Putnam 2012 ProcRSocB Endosymbiotic flexibility associates with environ sensitivity	<6-2012	NA	NA	NA	NA	No	spawner	gonochore
16745	Pavona duerdeni	ITS2	C3	25.9826	NA	French Frigate Shoals	Eastern Indo-Pacific	Hawaii	Hawaii	10-20'	10	20	23.8	-165	Normal Conditions	Original pub			Cloning of ITS2 & sequencing	Stat 2015 CoralReefs Geographic structure and host specificity	2005-2009	NA	2005	NA	2009	NA	spawner	gonochore
17448	Pavona varians	ITS2	C3	25.9826	NA	Moorea	Eastern Indo-Pacific	Central Polynesia	Society Islands	21	21	21	-17.5475	-149.769	Normal Conditions	Original Pub	HE579001	FR4	Cloning of ITS2 & sequencing	Putnam 2012 ProcRSocB Endosymbiotic flexibility associates with environ sensitivity	<6-2012	NA	NA	NA	NA	No	spawner	gonochore
X73	Platygyra crosslandi	ITS2	C3	25.9826	NA	Xiaodonghai Bay	Central Indo-Pacific	South China Sea	Gulf of Tonkin	1-10 m	1	10	18.2065	109.504	Normal conditions	Original pub			DGGE of ITS2 & sequencing	Zhou 2011 JSysEvol Low genetic diversity of symbiotic dinoflagellates	Oct '08	10	2008	10	2008	No	spawner	hermaphrodite
3154	Platygyra daedalea	ITS2	C3	25.9826	32	Heron Island, GBR	Central Indo-Pacific	Northeast Australian Shelf	Central and Southern GBR	3	3	3	-23	152	Normal Cond	SymbioGBR			DGGE of ITS2 & sequencing	LaJeunesse 2003 LimnolOceanogr Low symbiont diversity in southern Great Barrier Reef	Feb-Mar 2002	2	2002	3	2002	No	spawner	hermaphrodite
3032	Platygyra lamellina	ITS2	C3	25.9826	NA	Feather Reef GBR	Central Indo-Pacific	Northeast Australian Shelf	Central and Southern Great Barrier Reef	1-8'	1	8	-18	146	Normal Cond	Aquarist			DGGE of ITS2 & sequencing	LaJeunesse 2004 MEPS Closely related Symbiodinium spp differ in relative dominance	May (2003)	5	2003	5	2003	No	spawner	hermaphrodite
9775	Platygyra pini	ITS2	C3	25.9826	NA	Feather Reef GBR	Central Indo-Pacific	Northeast Australian Shelf	Central and Southern Great Barrier Reef	10-17'	10	17	-18	146	Normal Cond	Riddle 2011			DGGE of ITS2 & sequencing	LaJeunesse 2004 MEPS Closely related Symbiodinium spp differ in relative dominance	May (2003)	5	2003	5	2003	No	spawner	hermaphrodite
15164	Platygyra sinensis	ITS2	C3	25.9826	NA	Xiaodonghai Bay	Central Indo-Pacific	South China Sea	Gulf of Tonkin	1-10 m	1	10	18.2065	109.504	Normal conditions	Original pub			DGGE of ITS2 & sequencing	Zhou 2011 JSysEvol Low genetic diversity of symbiotic dinoflagellates	Oct '08	10	2008	10	2008	No	spawner	hermaphrodite
17810	Platygyra verweyi	ITS2	C3	25.9826	N/A	Hongcha	Central Indo-Pecific	South Kuroshio	South Kuroshio	3	3	3	21.9571	120.712	Normal Conditions	Original Publication			DGGE of ITS2 & sequencing	Keshavmurthy 2012 MolEcol Symbiont communities and	02-07, 2009	2	2009	7	2009	No	spawner	hermaphrodite
17306	Pleuractis paumotensis	ITS2	C3	25.9826	NA	Moorea	Eastern Indo-Pacific	Central Polynesia	Society Islands	5	5	5	-17.5155	-149.915	Normal Conditions	Original Pub		FG6	Cloning of ITS2 & sequencing	Putnam 2012 ProcRSocB Endosymbiotic flexibility associates with environ sensitivity	<6-2012	NA	NA	NA	NA	NA	spawner	gonochore
16774	Pocillopora damicornis	ITS2	C3	25.9826	NA	French Frigate Shoals	Eastern Indo-Pacific	Hawaii	Hawaii	0-10'	0	10	23.8	-165	Normal Conditions	Original pub			Cloning of ITS2 & sequencing	Stat 2015 CoralReefs Geographic structure and host specificity	2005-2009	NA	2005	NA	2009	Yes	brooder	hermaphrodite
17479	Pocillopora eydouxi	ITS2	C3	25.9826	NA	Moorea	Eastern Indo-Pacific	Central Polynesia	Society Islands	5	5	5	-17.5146	-149.762	Normal Conditions	Original Pub	HE579001	FR3	Cloning of ITS2 & sequencing	Putnam 2012 ProcRSocB Endosymbiotic flexibility associates with environ sensitivity	<6-2012	NA	NA	NA	NA	Yes	spawner	hermaphrodite
17035	Pocillopora meandrina	ITS2	C3	25.9826	NA	Kure	Eastern Indo-Pacific	Hawaii	Hawaii	10-20'	10	20	28.5108	-178.51	Normal Conditions	Original pub			Cloning of ITS2 & sequencing	Stat 2015 CoralReefs Geographic structure and host specificity	2005-2009	NA	2005	NA	2009	Yes	spawner	hermaphrodite
17522	Pocillopora verrucosa	ITS2	C3	25.9826	NA	Moorea	Eastern Indo-Pacific	Central Polynesia	Society Islands	21	21	21	-17.5475	-149.769	Normal Conditions	Original Pub	HE579001	FR4	Cloning of ITS2 & sequencing	Putnam 2012 ProcRSocB Endosymbiotic flexibility associates with environ sensitivity	<6-2012	NA	NA	NA	NA	Yes	spawner	hermaphrodite
1462	Porites astreoides	ITS2	C3	25.9826	NA	Barbados	Tropical Atlantic	Tropical Northwestern Atlantic	Eastern Caribbean	>10	10	30	13.07	-60	Normal Cond	Original pub	same_as_AF499789		DGGE of ITS2 & sequencing	Finney 2010 MicrobEcol The Relative Significance of Host–Habitat	Jul 02 -Aug 03	7	2002	8	2003	Yes	brooder	Mixed
15786	Porites cylindrica	ITS2	C3	25.9826	NA	Nosy Bé	Western Indo-Pacific	Western Indian Ocean	Western and Northern Madagascar		1	30	-13.4	48	Normal conditions	Original publication		collected at SCUBA depths	DGGE of ITS2 & sequencing	Boonstra 2011 Diss Latitudinal Patterns in the Distribution of Algal Symbionts		3	2007	3	2007	Yes	spawner	gonochore
X74	Porites divaricata	ITS2	C3	25.9826	NA	Puerto Morelos	Tropical Atlantic	Tropical Northwestern Atlantic	Southern Gulf of Mexico	3-6	3	6	21	-87	Normal Cond	Original pub			DGGE of ITS2 & sequencing	Aschaffenburg 2012 Diss Phsyiological response of Symbiodinium spp		6	2009	6	2009	Yes	brooder	gonochore
18024	Porites harrisoni	ITS2	C3	25.9826	NA	Saadiyat reef (Abu Dhabi)	Western Indo-Pacific	Somali/Arabian	Arabian (Persian) Gulf		5	7	24.4743	54.3823	Normal Cond	Direct from Pub			Cloning of DGGE isolated ITS2 & sequencing	Hume 2015 Sci Report Symbiodinium thermophilum	2012-09-01	9	2012	9	2012	NA	NA	NA
13423	Porites heronensis	ITS2	C3	25.9826	NA	Sylphs Hole (Lord Howe Island)	Central Indo-Pacific	Lord Howe and Norfolk Islands	Lord Howe and Norfolk Islands	2-3	2	3	-31.5203	-159.506	Normal Conditions	Direct From Source			DGGE of ITS2 & sequencing	Wicks 2010 CoralReefs Local endemicity and high diversity characterise high-latitudecoral–Symbiodiniumpartnerships		1	2007	1	2007	Yes	brooder	gonochore
16886	Porites lobata	ITS2	C3	25.9826	NA	Maro	Eastern Indo-Pacific	Hawaii	Hawaii	10-20'	10	20	25.5408	-170.798	Normal Conditions	Original pub			Cloning of ITS2 & sequencing	Stat 2015 CoralReefs Geographic structure and host specificity	2005-2009	NA	2005	NA	2009	Yes	spawner	gonochore
17574	Porites lutea	ITS2	C3	25.9826	NA	Moorea	Eastern Indo-Pacific	Central Polynesia	Society Islands	20	20	20	-17.475	-149.837	Normal Conditions	Original Pub	HE579001	FR1	Cloning of ITS2 & sequencing	Putnam 2012 ProcRSocB Endosymbiotic flexibility associates with environ sensitivity	<6-2012	NA	NA	NA	NA	Yes	spawner	gonochore
9196	Psammocora digitata	ITS2	C3	25.9826	NA	Cape Panwa	Western Indo-Pacific	Andaman	Andaman Sea Coral Coast	0-5	0	5	7.8073	98.4092	Normal Cond	Geosymbio			DGGE of ITS2 & sequencing	LaJeunesse 2010 JBiogeograph Long-standing environmental conditions isolation and host–symbiont specificity	2007-02-01	2	2007	2	2007	No	spawner	gonochore
4441	Seriatopora hystrix	ITS2	C3	25.9826	NA	TenementsII	Central Indo-Pacific	East Central Australian Shelf	Tweed-Moreton	17-19	17	19	-23.6897	152.127	Normal	SymbioGBR			DGGE of ITS2 & sequencing	Sampayo 2007 MolEcol Niche partitioning of closely related symbiotic dinoflagellates		10	2004	10	2005	Yes	brooder	hermaphrodite
9401	Siderastrea radians	ITS2	C3	25.9826	NA	Barbados	Tropical Atlantic	Tropical Northwestern Atlantic	Eastern Caribbean	6-10	6	10	13.07	-60	Normal Cond	Original pub			DGGE of ITS2 & sequencing	Finney 2010 MicrobEcol The Relative Significance of Host–Habitat	Jul 02 -Aug 03	7	2002	8	2003	yes	brooder	gonochore
12855	Siderastrea siderea	ITS2	C3	25.9826	02m-Ssid-02	Curaçao	Tropical Atlantic	Tropical Northwestern Atlantic	Southern Caribbean	2	2	2	12.1252	-68.9742	Normal Conditions	Original publication			DGGE of ITS2 & sequencing	Bongaerts 2015 RoySocOpenSci Prevalent endosymbiont zoantion		11	2009	11	2009	No	spawner	gonochore
13031	Stephanocoenia intersepta	ITS2	C3	25.9826	25m-Sint-05	Curaçao	Tropical Atlantic	Tropical Northwestern Atlantic	Southern Caribbean	25	25	25	12.1252	-68.9742	Normal Conditions	Original publication			DGGE of ITS2 & sequencing	Bongaerts 2015 RoySocOpenSci Prevalent endosymbiont zoantion		7	2008	8	2008	no	spawner	gonochore
9805	Symphyllia agaricia	ITS2	C3	25.9826	NA	Rib Reef GBR	Central Indo-Pacific	Northeast Australian Shelf	Central and Southern Great Barrier Reef	10-17'	10	17	-18	147	Normal Cond	Riddle 2011			DGGE of ITS2 & sequencing	LaJeunesse 2004 MEPS Closely related Symbiodinium spp differ in relative dominance	May (2003)	5	2003	5	2003	No	spawner	hermaphrodite
8856	Symphyllia radians	ITS2	C3	25.9826	NA	Heron Island	Central Indo-Pacific	Northeast Australian Shelf	Central and Southern GBR	3	3	3	-23	152	Normal Cond	Original pub			DGGE of ITS2 & sequencing	LaJeunesse 2003 LimnolOceanogr Low symbiont diversity in southern Great Barrier Reef	Feb and March 2002	2	2002	3	2002	No	spawner	hermaphrodite
X75	Oulastrea crispata	ITS2	D12-13	26.5603	NA	Watung	Central Indo-Pacific	South China Sea	Southern China	1-3	1	2	23.65	119.56	Normal Cond	Original pub			DGGE of ITS2 & sequencing	Lien 2013 MEPS Host genetics and Symbiodinium D diversity	2001-06	NA	2001	NA	2006	No	spawner	gonochore
15269	Siderastrea radians	ITS2	B5	26.5603	NA	Florida Keys, Florida Bay	Tropical Atlantic	Tropical Northwestern Atlantic	Floridian	1-2 m	1	2	25.0003	-80.7497	Normal conditions	Original pub			DGGE of ITS2 & sequencing	Thornhill 2006 CoralReefs Highly stable symbioses among western Atlantic brooding corals	2005-12-01	12	2005	12	2005	yes	brooder	gonochore
X76	Siderastrea siderea	ITS2	B5	26.5603	NA	Barbados, Caribbean	Tropical Atlantic	Tropical Northwestern Atlantic	Eastern Caribbean		1	5	13.192	-59.64	Normal Cond	Geosymbio			DGGE of ITS2 & sequencing	LaJeunesse 2009 ProcRSocB Outbreak and persistence of opportunistic Zoox during 2005 Caribbean bleaching		7	2005	12	2005	NA	spawner	gonochore
14305	Porites panamensis	ITS2	C66	29.2149	NA	La Paz, Mexico	Temperate Northern Pacific	Warm Temperate Northeast Pacific	Cortezian	.5-1	0.5	1	24.3543	-110.285	Normal Cond	Original pub			DGGE of ITS2 & sequencing	LaJeunesse 2008 LimnoOceano Specificity and stability in high latitude eastern Pacific coral–algal symbioses		5	2004	5	2006	Yes	brooder	gonochore
2768	Pocillopora damicornis	ITS2	D1-4-6	30.7309	NA	Cape Panwa	Western Indo-Pacific	Andaman	Andaman Sea Coral Coast	0-5	0	5	7.8073	98.4092	Normal Cond	Geosymbio	same_as_EU449061		DGGE of ITS2 & sequencing	LaJeunesse 2010 JBiogeograph Long-standing environmental conditions isolation and host–symbiont specificity	2007-02-01	2	2007	2	2007	Yes	brooder	hermaphrodite
9182	Pocillopora verrucosa	ITS2	D1-4-6	30.7309	NA	Ko Phi Phi Don	Western Indo-Pacific	Andaman	Andaman Sea Coral Coast	2-6	2	6	7.7333	98.7667	Normal Cond	Geosymbio			DGGE of ITS2 & sequencing	LaJeunesse 2010 JBiogeograph Long-standing environmental conditions isolation and host–symbiont specificity	2007-02-01	2	2007	2	2007	Yes	spawner	hermaphrodite
X77	Oulastrea crispata	ITS2	D8-12	30.987	NA	Toguchi	Central Indo-Pacific	South Kuroshio	South Kuroshio	1-3	1	3	27.08	127.15	Normal Cond				DGGE of ITS2 & sequencing	Lien 2013 MEPS Host genetics and Symbiodinium D diversity	2001-06	NA	2001	NA	2006	No	spawner	gonochore
19967	Stylophora pistillata	ITS2	C78	31.2988	NA	Heron Island, GBR	Central Indo-Pacific	Northeast Australian Shelf	Central and Southern GBR		3	6	-23.44	151.91	Normal	GenBank	EU807999		DGGE of ITS2 & sequencing	Sampayo 2008 PNAS Bleaching susceptibility and mortality of corals are determined by fine-scale differences in symbiont type		3	2005	3	2005	Yes	brooder	hermaphrodite
14065	Goniastrea australensis	ITS2	C1gg	31.6089	NA	Abrolhos Islands	Temperate Australasia	West Central Australian Shelf	Shark Bay	<7	0	7	-28.6382	113.865	Normal Cond		HQ328057		DGGE of ITS2 & sequencing	Silverstein 2011 MEPS Novel algal symbiont diversity in reef corals of Western Australia	2005-07-01	7	2005	7	2005	No	spawner	hermaphrodite
2924	Acropora cervicornis	ITS2	C12	31.8723	NA	Lee Stocking Island, Bahamas	Tropical Atlantic	Tropical Northwestern Atlantic	Bahamian	12	12	12	24	-76	Normal Cond	Aquarist			DGGE of ITS2 & sequencing	LaJeunesse 2002 MarBiol Diversity and community structure of symbiotic dinoflagellates		8	1998	9	1999	No	spawner	hermaphrodite
12050	Orbicella annularis	ITS2	C12	31.8723	05m-Mann-14	Curaçao	Tropical Atlantic	Tropical Northwestern Atlantic	Southern Caribbean	5	5	5	12.1252	-68.9742	Normal Conditions	Original publication			DGGE of ITS2 & sequencing	Bongaerts 2015 RoySocOpenSci Prevalent endosymbiont zoantion		11	2009	11	2009	No	spawner	hermaphrodite
12458	Orbicella faveolata	ITS2	C12	31.8723	05m-Mfav-01	Curaçao	Tropical Atlantic	Tropical Northwestern Atlantic	Southern Caribbean	5	5	5	12.1252	-68.9742	Normal Conditions	Original publication			DGGE of ITS2 & sequencing	Bongaerts 2015 RoySocOpenSci Prevalent endosymbiont zoantion		7	2008	8	2008	No	spawner	hermaphrodite
12122	Orbicella franksi	ITS2	C12	31.8723	10m-Mfra-01	Curaçao	Tropical Atlantic	Tropical Northwestern Atlantic	Southern Caribbean	10	10	10	12.1252	-68.9742	Normal Conditions	Original publication			DGGE of ITS2 & sequencing	Bongaerts 2015 RoySocOpenSci Prevalent endosymbiont zoantion		11	2009	11	2009	No	spawner	hermaphrodite
17210	Acropora abrotanoides	ITS2	A1	32.0691	NA	Moorea	Eastern Indo-Pacific	Central Polynesia	Society Islands	1	1	1	-17.5209	-149.921	Normal Conditions	Original Pub	HE578975	LG6	Cloning of ITS2 & sequencing	Putnam 2012 ProcRSocB Endosymbiotic flexibility associates with environ sensitivity	<6-2012	NA	NA	NA	NA	No	spawner	hermaphrodite
X78	Acropora downingi	ITS2	A1	32.0691	NA	Saadiyat reef (Abu Dhabi)	Western Indo-Pacific	Somali/Arabian	Arabian (Persian) Gulf		5	7	24.4743	54.3823	Normal Cond	Direct from Pub			Cloning of DGGE isolated ITS2 & sequencing	Hume 2015 Sci Report Symbiodinium thermophilum		6	2011	6	2011	No	spawner	hermaphrodite
16672	Acropora cytherea	ITS2	A1	32.0691	NA	French Frigate Shoals	Eastern Indo-Pacific	Hawaii	Hawaii	10-20'	10	20	23.7592	-164.807	Normal Conditions	Original pub			Cloning of ITS2 & sequencing	Stat 2015 CoralReefs Geographic structure and host specificity	2005-2009	NA	2005	NA	2009	No	spawner	hermaphrodite
17242	Acropora grandis	ITS2	A1	32.0691	NA	Moorea	Eastern Indo-Pacific	Central Polynesia	Society Islands	4	4	4	-17.485	-149.834	Normal Conditions	Original Pub	HE578975	FG1	Cloning of ITS2 & sequencing	Putnam 2012 ProcRSocB Endosymbiotic flexibility associates with environ sensitivity	<6-2012	NA	NA	NA	NA	No	spawner	hermaphrodite
16682	Acropora humilis	ITS2	A1	32.0691	NA	French Frigate Shoals	Eastern Indo-Pacific	Hawaii	Hawaii	10-20'	10	20	23.7592	-164.807	Normal Conditions	Original pub			Cloning of ITS2 & sequencing	Stat 2015 CoralReefs Geographic structure and host specificity	2005-2009	NA	2005	NA	2009	No	spawner	hermaphrodite
17259	Acropora hyacinthus	ITS2	A1	32.0691	NA	Moorea	Eastern Indo-Pacific	Central Polynesia	Society Islands	1	1	1	-17.4772	-149.802	Normal Conditions	Original Pub	HE578975	LG2	Cloning of ITS2 & sequencing	Putnam 2012 ProcRSocB Endosymbiotic flexibility associates with environ sensitivity	<6-2012	NA	NA	NA	NA	No	spawner	hermaphrodite
16555	Acropora muricata	ITS2	A1	32.0691	NA	Chagos Archipelago	Western Indo-Pacific	Central Indian Ocean Islands	Chagos	2-7m	2	7	-6	72	Normal Cond	Direct from Publication			DGGE of ITS2 & sequencing	Yang 2012 PLoSOne Diversity and Distribution of Symbiodinium Associated		3	2006	3	2006	NA	spawner	hermaphrodite
16692	Acropora nasuta	ITS2	A1	32.0691	NA	French Frigate Shoals	Eastern Indo-Pacific	Hawaii	Hawaii	10-20'	10	20	23.7592	-164.807	Normal Conditions	Original pub			Cloning of ITS2 & sequencing	Stat 2015 CoralReefs Geographic structure and host specificity	2005-2009	NA	2005	NA	2009	No	spawner	hermaphrodite
17970	Cyphastrea microphthalma	ITS2	A1	32.0691	NA	Saadiyat reef (Abu Dhabi)	Western Indo-Pacific	Somali/Arabian	Arabian (Persian) Gulf		5	7	24.4743	54.3823	Normal Cond	Direct from Pub		Colony 1	Cloning of DGGE isolated ITS2 & sequencing	Hume 2015 Sci Report Symbiodinium thermophilum	2013-03-28	2	2013	2	2013	No	spawner	hermaphrodite
17875	Dipsastraea pallida	ITS2	A1	32.0691	NA	Saadiyat Reef	Western Indo-Pacific	Somali/Arabian	Arabian (Persian) Gulf	4	4	4	24.4743	54.3823	Normal Cond	Direct from Publication		Listed as Favia pallida	Cloning of ITS2 & sequencing	Hume 2013 MarPollBull Corals from the Persian Gulf as models for thermotolerant	October 2011	8	2011	8	2011	NA	spawner	hermaphrodite
7638	Isopora palifera	ITS2	A1	32.0691	NA	Chagos Archipelago	Western Indo-Pacific	Central Indian Ocean Islands	Chagos	2-7m	2	7	-6	72	Normal Cond	Direct from Publication		Listed as Isopera palifera	DGGE of ITS2 & sequencing	Yang 2012 PLoSOne Diversity and Distribution of Symbiodinium Associated		3	2006	3	2006	No	brooder	hermaphrodite
17408	Montipora danae	ITS2	A1	32.0691	NA	Moorea	Eastern Indo-Pacific	Central Polynesia	Society Islands	1	1	1	-17.5793	-149.871	Normal Conditions	Original Pub	HE578975	LG5	Cloning of ITS2 & sequencing	Putnam 2012 ProcRSocB Endosymbiotic flexibility associates with environ sensitivity	<6-2012	NA	NA	NA	NA	Yes	spawner	hermaphrodite
17985	Platygyra daedalea	ITS2	A1	32.0691	NA	Saadiyat reef (Abu Dhabi)	Western Indo-Pacific	Somali/Arabian	Arabian (Persian) Gulf		5	7	24.4743	54.3823	Normal Cond	Direct from Pub		Colony 3	Cloning of DGGE isolated ITS2 & sequencing	Hume 2015 Sci Report Symbiodinium thermophilum	2012-11-25	11	2012	11	2012	No	spawner	hermaphrodite
18869	Pocillopora damicornis	ITS2	A1	32.0691	NA	Bise, Okinawa, Japan	Central Indo-Pacific	South Kuroshio	South Kuroshio	5-6	5	6	26.7003	127.881	Normal Cond	Original pub		sensu LaJeunesse A1	Direct sequencing of ITS1	Magalon 2007 CoralReefs Molecular identification of symbiotic dinoflagellates in Pacific corals in the genus Pocillopora	12/00 - 7/04	12	2000	7	2004	Yes	brooder	hermaphrodite
5636	Pocillopora eydouxi	ITS2	A1	32.0691	NA	Johnston Atoll, Hawaii	Eastern Indo-Pacific	Hawaii	Hawaii	3-7 m	3	7	18.078	-169.533	Normal Cond	GenBank	AF333505		Cloning of ITS2 & sequencing	Stat 2009 MEPS Specificity in communities of Symbiodinium in corals from Johnston Atoll	June '06	6	2006	6	2006	Yes	spawner	hermaphrodite
14584	Pocillopora meandrina	ITS2	A1	32.0691	NA	Johnston Atoll, Hawaii	Eastern Indo-Pacific	Hawaii	Hawaii	3-7 m	3	7	18.078	-169.533	Normal Cond	GenBank	AF333505		Cloning of ITS2 & sequencing	Stat 2009 MEPS Specificity in communities of Symbiodinium in corals from Johnston Atoll	June '06	6	2006	6	2006	Yes	spawner	hermaphrodite
17884	Porites harrisoni	ITS2	A1	32.0691	NA	Saadiyat Reef	Western Indo-Pacific	Somali/Arabian	Arabian (Persian) Gulf	4	4	4	24.4743	54.3823	Normal Cond	Direct from Publication			Cloning of ITS2 & sequencing	Hume 2013 MarPollBull Corals from the Persian Gulf as models for thermotolerant	October 2011	8	2011	8	2011	NA	NA	NA
13903	Porites lobata	ITS2	A1	32.0691	190	French Frigate Shoals	Eastern Indo-Pacific	Hawaii	Hawaii	1-8	1	8	23.50.969	-166.19.194	Normal Conditions	Original publication		7 Low TSA	Cloning of ITS2 & sequencing	Stat 2013 Ecol&Evol Distribution of the thermally tolerant symbiont lineage Symbiodinium in corals from Hawaii	2007-08-01	8	2007	8	2007	Yes	spawner	gonochore
3063	Stylophora pistillata	ITS2	C8	33.1048	NA	Feather Reef GBR	Central Indo-Pacific	Northeast Australian Shelf	Central and Southern Great Barrier Reef	10-17'	10	17	-18	146	Normal Cond	Aquarist			DGGE of ITS2 & sequencing	LaJeunesse 2004 MEPS Closely related Symbiodinium spp differ in relative dominance	May (2003)	5	2003	5	2003	Yes	brooder	hermaphrodite
X79	Oculina arbuscula	ITS2	B2	34.9374	NA	J Reef, Georgia	Temperate Northern Atlantic	Warm Temperate Northwest Atlantic	Carolinian	18.3–21.3	18	21	31.601	80.79	Normal Cond	Original pub			DGGE of ITS2 & sequencing	Thornhill 2008 JPhycol Correspondence between cold tolerance and temperate biogeography	2005-07-01	7	2005	7	2005	No	spawner	gonochore
X80	Oculina diffusa	ITS2	B2	34.9374	NA	Bermuda	Tropical Atlantic	Tropical Northwestern Atlantic	Bermuda	NA	NA	NA	NA	NA	Normal Cond	Original pub			DGGE of ITS2 & sequencing	Thornhill 2008 JPhycol Correspondence between cold tolerance and temperate biogeography	NA	NA	NA	NA	NA	No	spawner	gonochore
X81	Astrangia poculata	ITS2	B2	34.9374	NA	J Reef, Georgia	Temperate Northern Atlantic	Warm Temperate Northwest Atlantic	Carolinian	18.3–21.3	18	21	31.601	80.79	Normal Cond	Original pub			DGGE of ITS2 & sequencing	Thornhill 2008 JPhycol Correspondence between cold tolerance and temperate biogeography	2005-07-01	7	2005	7	2005	NA	spawner	gonochore
X82	Oulastrea crispata	ITS2	D13	35.4137	NA	Watung	Central Indo-Pacific	South China Sea	Southern China	1-3	1	2	23.65	119.56	Normal Cond	Original pub			DGGE of ITS2 & sequencing	Lien 2013 MEPS Host genetics and Symbiodinium D diversity	2001-06	NA	2001	NA	2006	No	spawner	gonochore
X83	Oulastrea crispata	ITS2	D8	35.4137	NA	Toguchi	Central Indo-Pacific	South Kuroshio	South Kuroshio	1-3	1	3	27.08	127.15	Normal Cond				DGGE of ITS2 & sequencing	Lien 2013 MEPS Host genetics and Symbiodinium D diversity	2001-06	NA	2001	NA	2006	No	spawner	gonochore
3872	Stylophora pistillata	ITS2	C35a	35.56	NA	Harry’s Bommie	Central Indo-Pacific	East Central Australian Shelf	Tweed-Moreton	3-5	3	5	-23.6236	152.127	Normal	SymbioGBR	EF541146	Sampayo 2009 MolEcol: C35a = Sp-1	DGGE of ITS2 & sequencing	Sampayo 2007 MolEcol Niche partitioning of closely related symbiotic dinoflagellates		10	2004	10	2005	Yes	brooder	hermaphrodite
5322	Acropora cytherea	ITS2	C1c	35.7064	e	French Frigate Shoals	Eastern Indo-Pacific	Hawaii	Hawaii	NA	NA	NA	23.82	-166.11	Normal Cond	GenBank	EF656433		Cloning of ITS2 & sequencing	Stat 2008 BiolInvasions Vectored introductions of marine endosymbiotic dinoflagellates into Hawaii		5	2006	5	2006	No	spawner	hermaphrodite
5241	Coelastrea aspera	ITS2	C1c	35.7064	NA	Dampier	Centra Indo-Pacific	Northwest Australian Shelf	Exmouth to Broome	<7	0	7	-20.6595	116.708	Moderate bleaching				DGGE of ITS2 & sequencing	Silverstein 2011 MEPS Novel algal symbiont diversity in reef corals of Western Australia	2005-06-01	6	2005	6	2005	No	spawner	hermaphrodite
15147	Dipsastraea matthaii	ITS2	C1c	35.7064	NA	Ximao Island (Xidao on Google Maps)	Central Indo-Pacific	South China Sea	Gulf of Tonkin	1-10 m	1	10	18.2353	109.374	Normal conditions	Original pub	AY239364	Zhou uses unaccepted name, Favia matthaii	DGGE of ITS2 & sequencing	Zhou 2011 JSysEvol Low genetic diversity of symbiotic dinoflagellates	Oct '08	10	2008	10	2008	NA	spawner	hermaphrodite
13364	Goniastrea favulus	ITS2	C1c	35.7064	NA	Stephens Hole (Lord Howe Island)	Central Indo-Pacific	Lord Howe and Norfolk Islands	Lord Howe and Norfolk Islands	2-3	2	3	-31.5322	-159.504	Normal Conditions	Direct From Source			DGGE of ITS2 & sequencing	Wicks 2010 CoralReefs Local endemicity and high diversity characterise high-latitudecoral–Symbiodiniumpartnerships		1	2007	1	2007	No	spawner	hermaphrodite
13342	Isopora cuneata	ITS2	C1c	35.7064	NA	Sylphs Hole (Lord How Island)	Central Indo-Pacific	Lord Howe and Norfolk Islands	Lord Howe and Norfolk Islands	2-3	2	3	-31.5203	-159.506	Normal Conditions	Direct From Source		Listed as Acropora cuneata	DGGE of ITS2 & sequencing	Wicks 2010 CoralReefs Local endemicity and high diversity characterise high-latitudecoral–Symbiodiniumpartnerships		1	2007	1	2007	NA	brooder	hermaphrodite
X84	Montipora turgescens	ITS2	C1c	35.7064	NA	Luhuitou Bay	Central Indo-Pacific	South China Sea	Gulf of Tonkin	1-10 m	1	10	18.2217	109.495	Normal conditions	Original pub			DGGE of ITS2 & sequencing	Zhou 2011 JSysEvol Low genetic diversity of symbiotic dinoflagellates	Oct '08	10	2008	10	2008	Yes	spawner	hermaphrodite
3066	Pavona clavus	ITS2	C1c	35.7064	NA	La Paz, Mexico	Temperate Northern Pacific	Warm Temperate Northeast Pacific	Cortezian	4-7	4	7	24.3543	-110.285	Normal Cond	Aquarist			DGGE of ITS2 & sequencing	LaJeunesse 2008 LimnoOceano Specificity and stability in high latitude eastern Pacific coral–algal symbioses		5	2004	5	2006	No	spawner	gonochore
16193	Pavona duerdeni	ITS2	C1c	35.7064	NA	Penguin Spit Mid	Eastern Indo-Pacific	Central Polynesia	Line Islands	2-3	2	3	5.8721	-162.108	Normal conditions	Original publication			DGGE of ITS2 & sequencing	Wicks 2012 Host tolerance, not symbiont tolerance, determinesthe distribution of coral species in relation to their environmentat a Central Pacific atoll	2007-06-01	6	2007	6	2007	NA	spawner	gonochore
3069	Pavona gigantea	ITS2	C1c	35.7064	NA	La Paz, Mexico	Temperate Northern Pacific	Warm Temperate Northeast Pacific	Cortezian	3-12	3	12	24.3509	-110.325	Normal Cond	Original pub			DGGE of ITS2 & sequencing	LaJeunesse 2008 LimnoOceano Specificity and stability in high latitude eastern Pacific coral–algal symbioses		5	2004	5	2006	No	spawner	gonochore
3155	Pocillopora damicornis	ITS2	C1c	35.7064	33	Heron Island, GBR	Central Indo-Pacific	Northeast Australian Shelf	Central and Southern GBR	3	3	3	-23	152	Normal Cond	Aquarist			DGGE of ITS2 & sequencing	LaJeunesse 2003 LimnolOceanogr Low symbiont diversity in southern Great Barrier Reef	Feb-Mar 2002	2	2002	3	2002	Yes	brooder	hermaphrodite
9172	Pocillopora elegans	ITS2	C1c	35.7064	NA	Changuu	Western Indo-Pacific	Western Indian Ocean	East African Coral Coast	2-6	2	6	-6.12007	39.1681	Normal Cond	Geosymbio			DGGE of ITS2 & sequencing	LaJeunesse 2010 JBiogeograph Long-standing environmental conditions isolation and host–symbiont specificity	2007-04-01	4	2007	4	2007	Yes	spawner	hermaphrodite
3212	Pocillopora eydouxi	ITS2	C1c	35.7064	n/a	Oahu	Eastern Indo-Pacific	Hawaii	Hawaii	20	20	20	21.4667	-157.983	Normal Cond	Aquarist		Article does not say where each sample was from, but all sites (Kaneohe Bay, Haleiwa Trench, and Wailua Bay) are off the island of Oahu	DGGE of ITS2 & sequencing	LaJeunesse 2004 CoralReefs High diversity and host specificity observed among symbiotic	<10-2003	NA	NA	NA	NA	Yes	spawner	hermaphrodite
9615	Pocillopora meandrina	ITS2	C1c	35.7064	n/a	Oahu	Eastern Indo-Pacific	Hawaii	Hawaii	2-20	2	20	21.4667	-157.983	Normal Cond	Aquarist		Article does not say where each sample was from, but all sites (Kaneohe Bay, Haleiwa Trench, and Wailua Bay) are off the island of Oahu	DGGE of ITS2 & sequencing	LaJeunesse 2004 CoralReefs High diversity and host specificity observed among symbiotic	<10-2003	NA	NA	NA	NA	Yes	spawner	hermaphrodite
9782	Pocillopora verrucosa	ITS2	C1c	35.7064	NA	Feather Reef GBR	Central Indo-Pacific	Northeast Australian Shelf	Central and Southern Great Barrier Reef	1-8'	1	8	-18	146	Normal Cond	Riddle 2011			DGGE of ITS2 & sequencing	LaJeunesse 2004 MEPS Closely related Symbiodinium spp differ in relative dominance	May (2003)	5	2003	5	2003	Yes	spawner	hermaphrodite
15193	Psammocora digitata	ITS2	C1c	35.7064	NA	Xipai Island	Central Indo-Pacific	South China Sea	Gulf of Tonkin	1-10 m	1	10	18.2157	109.631	Normal conditions	Original pub	AY239364		DGGE of ITS2 & sequencing	Zhou 2011 JSysEvol Low genetic diversity of symbiotic dinoflagellates	Oct '08	10	2008	10	2008	No	spawner	gonochore
5942	Acropora cervicornis	ITS2	A3	35.8563	NA	Florida Keys	Tropical Atlantic	Tropical Northwestern Atlantic	Floridian	3	3	3	24.98	-80.36	Normal conditions	GeoSymbio	same_as_AF333507	Little Grecian	DGGE of ITS2	Thornhill 2006 MarBiol Multi-year seasonal genotypic surveys of coral-algal symbioses		11	2002	11	2002	No	spawner	hermaphrodite
17244	Acropora grandis	ITS2	A3	35.8563	NA	Moorea	Eastern Indo-Pacific	Central Polynesia	Society Islands	4	4	4	-17.485	-149.834	Normal Conditions	Original Pub	HE578978	FG1	Cloning of ITS2 & sequencing	Putnam 2012 ProcRSocB Endosymbiotic flexibility associates with environ sensitivity	<6-2012	NA	NA	NA	NA	No	spawner	hermaphrodite
17261	Acropora hyacinthus	ITS2	A3	35.8563	NA	Moorea	Eastern Indo-Pacific	Central Polynesia	Society Islands	1	1	1	-17.4772	-149.802	Normal Conditions	Original Pub	HE578978	LG2	Cloning of ITS2 & sequencing	Putnam 2012 ProcRSocB Endosymbiotic flexibility associates with environ sensitivity	<6-2012	NA	NA	NA	NA	No	spawner	hermaphrodite
5738	Acropora palmata	ITS2	A3	35.8563	NA	Florida Keys	Tropical Atlantic	Tropical Northwestern Atlantic	Floridian	3	3	3	24.98	-80.36	Normal conditions	GeoSymbio	same_as_AF333507		DGGE of ITS2	Thornhill 2006 MarBiol Multi-year seasonal genotypic surveys of coral-algal symbioses		11	2002	11	2002	No	spawner	hermaphrodite
17411	Montipora danae	ITS2	A3	35.8563	NA	Moorea	Eastern Indo-Pacific	Central Polynesia	Society Islands	2	2	2	-17.5209	-149.921	Normal Conditions	Original Pub	HE578978	LG6	Cloning of ITS2 & sequencing	Putnam 2012 ProcRSocB Endosymbiotic flexibility associates with environ sensitivity	<6-2012	NA	NA	NA	NA	Yes	spawner	hermaphrodite
7554	Orbicella faveolata	ITS2	A3	35.8563	NA	Carrie Bow Cay, Belize	Tropical Atlantic	Tropical Northwestern Atlantic	Western Caribbean	8	8	8	16.803	-88.0816	Normal Conditions	Aquarist		Listed as Montastraea faveolata	DGGE of ITS2 & sequencing	Warner 2006 LimnolOceanograph The ecological distribution and comparative photobiology of symbiotic dinoflagellates from reef corals in Belize	2002-03	NA	2002	NA	2003	No	spawner	hermaphrodite
2951	Porites astreoides	ITS2	A3	35.8563	1	Puerto Morelos, Yucatan, Mexico	Tropical Atlantic	Tropical Northwestern Atlantic	Southern Gulf of Mexico	2.5	2.5	2.5	21	-87	Normal Cond	Aquarist			DGGE of ITS2 & sequencing	LaJeunesse 2002 MarBiol Diversity and community structure of symbiotic dinoflagellates		8	1998	9	1999	Yes	brooder	Mixed
9387	Porites divaricata	ITS2	A3	35.8563	NA	Belize	Tropical Atlantic	Tropical Northwestern Atlantic	Western Caribbean	1-5	1	5	17	-88	Normal Cond	Original pub			DGGE of ITS2 & sequencing	Finney 2010 MicrobEcol The Relative Significance of Host–Habitat	Jul 02 -Aug 03	7	2002	8	2003	Yes	brooder	gonochore
1417	Porites porites	ITS2	A3	35.8563	NA	Belize	Tropical Atlantic	Tropical Northwestern Atlantic	Western Caribbean	1-5	1	5	17	-88	Normal Cond	Original pub	same_as_AF333507		DGGE of ITS2 & sequencing	Finney 2010 MicrobEcol The Relative Significance of Host–Habitat	Jul 02 -Aug 03	7	2002	8	2003	Yes	brooder	gonochore
9392	Siderastrea radians	ITS2	A3	35.8563	NA	Barbados	Tropical Atlantic	Tropical Northwestern Atlantic	Eastern Caribbean	6-10	6	10	13.07	-60	Normal Cond	Original pub			DGGE of ITS2 & sequencing	Finney 2010 MicrobEcol The Relative Significance of Host–Habitat	Jul 02 -Aug 03	7	2002	8	2003	yes	brooder	gonochore
14051	Stephanocoenia intersepta	ITS2	A3	35.8563	NA	Carrie Bow Cay, Belize	Tropical Atlantic	Tropical Northwestern Atlantic	Western Caribbean	15	15	15	16.803	-88.0816	Normal Conditions	Aquarist			DGGE of ITS2 & sequencing	Warner 2006 LimnolOceanograph The ecological distribution and comparative photobiology of symbiotic dinoflagellates from reef corals in Belize	2002-09-01	9	2002	9	2002	no	spawner	gonochore
12646	Porites astreoides	ITS2	A4a	36.8647	05m-Past-01	Curaçao	Tropical Atlantic	Tropical Northwestern Atlantic	Southern Caribbean	5	5	5	12.1252	-68.9742	Normal Conditions	Original publication			DGGE of ITS2 & sequencing	Bongaerts 2015 RoySocOpenSci Prevalent endosymbiont zoantion		7	2008	8	2008	Yes	brooder	Mixed
4730	Pocillopora damicornis	ITS2	C33	37.0307	NA	Harry’s Bommie	Central Indo-Pacific	East Central Australian Shelf	Tweed-Moreton	3-5	3	5	-23.6236	152.127	Normal	SymbioGBR	EF541148		DGGE of ITS2 & sequencing	Sampayo 2007 MolEcol Niche partitioning of closely related symbiotic dinoflagellates		10	2004	10	2005	Yes	brooder	hermaphrodite
X85	Goniastrea favulus	ITS2	D1a-c	37.0307	NA	Heron Island	Central Indo-Pacific	Northeast Australian Shelf	Central and Southern GBR	0-15	0	15	-23	152	Normal Cond	Original pub			LSU	Stat 2009 CoralReefs Stability of coral–endosymbiont associations	2001-2002	8	2001	7	2002	No	spawner	hermaphrodite
17959	Cyphastrea microphthalma	ITS2	C15	37.5926	NA	Saadiyat reef (Abu Dhabi)	Western Indo-Pacific	Somali/Arabian	Arabian (Persian) Gulf		5	7	24.4743	54.3823	Normal Cond	Direct from Pub		Colony 1	Cloning of DGGE isolated ITS2 & sequencing	Hume 2015 Sci Report Symbiodinium thermophilum	2012-11-25	11	2012	11	2012	No	spawner	hermaphrodite
17874	Dipsastraea pallida	ITS2	C15	37.5926	NA	Saadiyat Reef	Western Indo-Pacific	Somali/Arabian	Arabian (Persian) Gulf	4	4	4	24.4743	54.3823	Normal Cond	Direct from Publication		Listed as Favia pallida	Cloning of ITS2 & sequencing	Hume 2013 MarPollBull Corals from the Persian Gulf as models for thermotolerant	October 2011	8	2011	8	2011	NA	spawner	hermaphrodite
2534	Fungia fungites	ITS2	C15	37.5926	NA	Cape Panwa	Western Indo-Pacific	Andaman	Andaman Sea Coral Coast	0-5	0	5	7.8073	98.4092	Normal Cond	Geosymbio	same_as_AY239369		DGGE of ITS2 & sequencing	LaJeunesse 2010 JBiogeograph Long-standing environmental conditions isolation and host–symbiont specificity	2007-02-01	2	2007	2	2007	No	spawner	gonochore
2585	Hydnophora exesa	ITS2	C15	37.5926	NA	Koh Hae	Western Indo-Pacific	Andaman	Andaman Sea Coral Coast	2-6	2	6	7.7456	98.3763	Normal Cond	Geosymbio	same_as_AY239369		DGGE of ITS2 & sequencing	LaJeunesse 2010 JBiogeograph Long-standing environmental conditions isolation and host–symbiont specificity	2007-02-01	2	2007	2	2007	No	spawner	hermaphrodite
X86	Leptoseris explanata	ITS2	C15	37.5926	NA	Al Fahal Reef	Western Indo-Pacific	Red Sea and Gulf of Aden	Northern and Central Red Sea	40	40	40	22.3	38.96	Normal	Original Publication			DGGE of ITS2 & sequencing	Ziegler 2015 FrontMarSci Mesophotic coral depth acclimatization is a function	2016-09-12	9	2012	9	2012	No	spawner	gonochore
X87	Leptoseris mycetoseroides	ITS2	C15	37.5926	NA	Moorea	Eastern Indo-Pacific	Central Polynesia	Society Islands	5	5	5	-17.485	-149.834	Normal Conditions	Original Pub		FG6	Cloning of ITS2 & sequencing	Putnam 2012 ProcRSocB Endosymbiotic flexibility associates with environ sensitivity	<6-2012	NA	NA	NA	NA	NA	NA	NA
18119	Montipora aequituberculata	ITS2	C15	37.5926	NA	Kenting National Park, Taiwan	Central Indo-Pacific	South Kuroshio	South Kuroshio	< 5m	0	5	21.9317	120.746	Exposed to warm water outflow from nuclear power plant	Original Publication			DGGE of ITS2 & sequencing	Wang 2011 MEPS Photosystem II breakdown induced by reactiveoxygen species in freshly-isolated Symbiodiniumfrom Montipora(Scleractinia; Acroporidae)	Between October 2008 and June 2009	10	2008	6	2009	Yes	spawner	hermaphrodite
9099	Montipora caliculata	ITS2	C15	37.5926	NA	Racha	Western Indo-Pacific	Andaman	Andaman Sea Coral Coast	2-5	2	5	7.6101	98.3706	Normal Cond	Geosymbio			DGGE of ITS2 & sequencing	LaJeunesse 2010 JBiogeograph Long-standing environmental conditions isolation and host–symbiont specificity	2007-02-01	2	2007	2	2007	Yes	spawner	hermaphrodite
13450	Montipora capitata	ITS2	C15	37.5926	102	Pearl & Hermes	Eastern Indo-Pacific	Hawaii	Hawaii	1-8	1	8	27.55.580	-175.52.587	Normal Conditions	Original publication		21 Intermediate TSA	Cloning of ITS2 & sequencing	Stat 2013 Ecol&Evol Distribution of the thermally tolerant symbiont lineage Symbiodinium in corals from Hawaii	2007-08-01	8	2007	8	2007	Yes	spawner	hermaphrodite
9977	Montipora crassituberculata	ITS2	C15	37.5926	NA	Magnetic Island, GBR	Central Indo-Pacific	Northeast Australian Shelf	Central and Southern GBR	NA	NA	NA	-19.1369	146.842	Normal Cond	Original pub		ITS1, Cdot	SSCP of ITS1	Abrego 2009 MolEcol Highly infectious symbiont dominates		NA	2003	NA	2006	Yes	spawner	hermaphrodite
15294	Montipora danae	ITS2	C15	37.5926	NA	Irian Jaya, Indonesia	Central Indo-Pacific	Western Coral Triangle	Papua	NA	NA	NA	-1.61	133.1	Normal Cond	Original pub		ITS1, Cdot (converted to ITS2 C15/C17)	SSCP of ITS1, cloning & sequencing	van Oppen 2004 MarBiol Mode of zooxanthella transmission does not affect zooxanthella diversity	1905-06-25	NA	2003	NA	2003	Yes	spawner	hermaphrodite
9108	Montipora digitata	ITS2	C15	37.5926	NA	Racha	Western Indo-Pacific	Andaman	Andaman Sea Coral Coast	2-5	2	5	7.6101	98.3706	Normal Cond	Geosymbio			DGGE of ITS2 & sequencing	LaJeunesse 2010 JBiogeograph Long-standing environmental conditions isolation and host–symbiont specificity	2007-02-01	2	2007	2	2007	Yes	spawner	hermaphrodite
X88	Montipora efflorescens	ITS2	C15	37.5926	NA	Kenting National Park, Taiwan	Central Indo-Pacific	South Kuroshio	South Kuroshio	< 5m	0	5	21.9317	120.746	Exposed to warm water outflow from nuclear power plant	Original Publication			DGGE of ITS2 & sequencing	Wang 2011 MEPS Photosystem II breakdown induced by reactiveoxygen species in freshly-isolated Symbiodiniumfrom Montipora(Scleractinia; Acroporidae)	Between October 2008 and June 2009	10	2008	6	2009	Yes	spawner	hermaphrodite
18146	Montipora foliosa	ITS2	C15	37.5926	NA	Kenting National Park, Taiwan	Central Indo-Pacific	South Kuroshio	South Kuroshio	< 5m	0	5	21.9317	120.746	Exposed to warm water outflow from nuclear power plant	Original Publication			DGGE of ITS2 & sequencing	Wang 2011 MEPS Photosystem II breakdown induced by reactiveoxygen species in freshly-isolated Symbiodiniumfrom Montipora(Scleractinia; Acroporidae)	Between October 2008 and June 2009	10	2008	6	2009	Yes	spawner	hermaphrodite
X89	Montipora gaimardi	ITS2	C15	37.5926	NA	Kenting National Park, Taiwan	Central Indo-Pacific	South Kuroshio	South Kuroshio	< 5m	0	5	21.9317	120.746	Exposed to warm water outflow from nuclear power plant	Original Publication			DGGE of ITS2 & sequencing	Wang 2011 MEPS Photosystem II breakdown induced by reactiveoxygen species in freshly-isolated Symbiodiniumfrom Montipora(Scleractinia; Acroporidae)	Between October 2008 and June 2009	10	2008	6	2009	Yes	spawner	hermaphrodite
9109	Montipora hispida	ITS2	C15	37.5926	NA	Ko Phi Phi Don	Western Indo-Pacific	Andaman	Andaman Sea Coral Coast	2-6	2	6	7.7333	98.7667	Normal Cond	Geosymbio			DGGE of ITS2 & sequencing	LaJeunesse 2010 JBiogeograph Long-standing environmental conditions isolation and host–symbiont specificity	2007-02-01	2	2007	2	2007	Yes	spawner	hermaphrodite
15334	Montipora hoffmeisteri	ITS2	C15	37.5926	NA	Irian Jaya, Indonesia	Central Indo-Pacific	Western Coral Triangle	Papua	NA	NA	NA	-1.61	133.1	Normal Cond	Original pub		ITS1, Cdot (converted to ITS2 C15/C17)	SSCP of ITS1, cloning & sequencing	van Oppen 2004 MarBiol Mode of zooxanthella transmission does not affect zooxanthella diversity	1905-06-25	6	2005	6	2005	Yes	spawner	hermaphrodite
9114	Montipora mollis	ITS2	C15	37.5926	NA	Similan Islands	Western Indo-Pacific	Andaman	Andaman Sea Coral Coast	2-12	2	12	8.6525	97.6408	Normal Cond	Geosymbio			DGGE of ITS2 & sequencing	LaJeunesse 2010 JBiogeograph Long-standing environmental conditions isolation and host–symbiont specificity	2007-02-01	2	2007	2	2007	Yes	spawner	hermaphrodite
18145	Montipora monasteriata	ITS2	C15	37.5926	NA	Kenting National Park, Taiwan	Central Indo-Pacific	South Kuroshio	South Kuroshio	< 5m	0	5	21.9317	120.746	Exposed to warm water outflow from nuclear power plant	Original Publication			DGGE of ITS2 & sequencing	Wang 2011 MEPS Photosystem II breakdown induced by reactiveoxygen species in freshly-isolated Symbiodiniumfrom Montipora(Scleractinia; Acroporidae)	Between October 2008 and June 2009	10	2008	6	2009	Yes	spawner	hermaphrodite
15338	Montipora peltiformis	ITS2	C15	37.5926	NA	Nelly Bay, Magnetic Island, GBR	Central Indo-Pacific	Northeast Australian Shelf	Central and Southern GBR	NA	NA	NA	-19.2	146.9	Normal Cond	Original pub		ITS1, Cdot (converted to ITS2 C15/C17)	SSCP of ITS1, cloning & sequencing	van Oppen 2004 MarBiol Mode of zooxanthella transmission does not affect zooxanthella diversity	1905-06-25	6	2005	6	2005	Yes	spawner	hermaphrodite
15342	Montipora spongodes	ITS2	C15	37.5926	NA	Nelly Bay, Magnetic Island, GBR	Central Indo-Pacific	Northeast Australian Shelf	Central and Southern GBR	NA	NA	NA	-19.2	146.9	Normal Cond	Original pub		ITS1, Cdot (converted to ITS2 C15/C17)	SSCP of ITS1, cloning & sequencing	van Oppen 2004 MarBiol Mode of zooxanthella transmission does not affect zooxanthella diversity	1905-06-25	6	2005	6	2005	Yes	spawner	hermaphrodite
9118	Montipora tuberculosa	ITS2	C15	37.5926	NA	Ko Phi Phi Don	Western Indo-Pacific	Andaman	Andaman Sea Coral Coast	2-6	2	6	7.7333	98.7667	Normal Cond	Geosymbio			DGGE of ITS2 & sequencing	LaJeunesse 2010 JBiogeograph Long-standing environmental conditions isolation and host–symbiont specificity	2007-02-01	2	2007	2	2007	Yes	spawner	hermaphrodite
15348	Montipora undata	ITS2	C15	37.5926	NA	Irian Jaya, Indonesia	Central Indo-Pacific	Western Coral Triangle	Papua	NA	NA	NA	-1.61	133.1	Normal Cond	Original pub		ITS1, Cdot (converted to ITS2 C15/C17)	SSCP of ITS1, cloning & sequencing	van Oppen 2004 MarBiol Mode of zooxanthella transmission does not affect zooxanthella diversity	1905-06-25		2003		2003	Yes	spawner	hermaphrodite
7266	Montipora verrucosa	ITS2	C15	37.5926	NA	Irian Jaya, Indonesia	Central Indo-Pacific	Western Coral Triangle	Papua	NA	NA	NA	-1.61	133.1	Normal Cond	Original pub		ITS1, Cdot (converted to ITS2 C15/C17)	SSCP of ITS1, cloning & sequencing	van Oppen 2004 MarBiol Mode of zooxanthella transmission does not affect zooxanthella diversity	1905-06-25	NA	2003	NA	2003	Yes	spawner	hermaphrodite
16746	Pavona duerdeni	ITS2	C15	37.5926	NA	French Frigate Shoals	Eastern Indo-Pacific	Hawaii	Hawaii	10-20'	10	20	23.8	-165	Normal Conditions	Original pub			Cloning of ITS2 & sequencing	Stat 2015 CoralReefs Geographic structure and host specificity	2005-2009	NA	2005	NA	2009	NA	spawner	gonochore
16758	Pavona varians	ITS2	C15	37.5926	NA	French Frigate Shoals	Eastern Indo-Pacific	Hawaii	Hawaii	0-10'	0	10	23.8	-165	Normal Conditions	Original pub			Cloning of ITS2 & sequencing	Stat 2015 CoralReefs Geographic structure and host specificity	2005-2009	NA	2005	NA	2009	No	spawner	gonochore
15157	Platygyra daedalea	ITS2	C15	37.5926	NA	Xiaodonghai Bay	Central Indo-Pacific	South China Sea	Gulf of Tonkin	1-10 m	1	10	18.2065	109.504	Normal conditions	Original pub	AF499789		DGGE of ITS2 & sequencing	Zhou 2011 JSysEvol Low genetic diversity of symbiotic dinoflagellates	Oct '08	10	2008	10	2008	No	spawner	hermaphrodite
17325	Pleuractis paumotensis	ITS2	C15	37.5926	NA	Moorea	Eastern Indo-Pacific	Central Polynesia	Society Islands	2	2	2	-17.5209	-149.921	Normal Conditions	Original Pub		LG6	Cloning of ITS2 & sequencing	Putnam 2012 ProcRSocB Endosymbiotic flexibility associates with environ sensitivity	<6-2012	NA	NA	NA	NA	NA	spawner	gonochore
17466	Pocillopora damicornis	ITS2	C15	37.5926	NA	Moorea	Eastern Indo-Pacific	Central Polynesia	Society Islands	2	2	2	-17.579	-149.864	Normal Conditions	Original Pub	HE579013	FG5	Cloning of ITS2 & sequencing	Putnam 2012 ProcRSocB Endosymbiotic flexibility associates with environ sensitivity	<6-2012	NA	NA	NA	NA	Yes	brooder	hermaphrodite
16826	Pocillopora meandrina	ITS2	C15	37.5926	NA	Gardner	Eastern Indo-Pacific	Hawaii	Hawaii	10-20'	10	20	25.0014	-168.237	Normal Conditions	Original pub			Cloning of ITS2 & sequencing	Stat 2015 CoralReefs Geographic structure and host specificity	2005-2009	NA	2005	NA	2009	Yes	spawner	hermaphrodite
9191	Porites annae	ITS2	C15	37.5926	NA	Racha	Western Indo-Pacific	Andaman	Andaman Sea Coral Coast	2-5	2	5	7.6101	98.3706	Normal Cond	Geosymbio			DGGE of ITS2 & sequencing	LaJeunesse 2010 JBiogeograph Long-standing environmental conditions isolation and host–symbiont specificity	2007-02-01	2	2007	2	2007	Yes	spawner	gonochore
1408	Porites attenuata	ITS2	C15	37.5926	NA	Palau	Central Indo-Pacific	Tropical Northwestern Pacific	West Caroline Islands		5	6	7.27	134.42	Normal Cond	GenBank	AY456954	ITS1 C·	SSCP of ITS1, cloning & sequencing	Fabricius 2004 MolEcol Identity and diversity of coral endosymbionts from three Palauan reefs		10	2001	10	2001	NA	brooder	NA
13857	Porites compressa	ITS2	C15	37.5926	165	Kaneohe Bay	Eastern Indo-Pacific	Hawaii	Hawaii	1-8	1	8	21.26.992	-157.478	Normal Conditions	Original publication		36 High TSA	Cloning of ITS2 & sequencing	Stat 2013 Ecol&Evol Distribution of the thermally tolerant symbiont lineage Symbiodinium in corals from Hawaii	2007-06-01	6	2007	6	2007	Yes	spawner	gonochore
5437	Porites cylindrica	ITS2	C15	37.5926	NA	Heron Reef, GBR	Central Indo-Pacific	Northeast Australian Shelf	Central and Southern GBR	Intertidal flat	0	1	-23.4167	151.917	Normal Cond	Aquarist	EF372070	Clsu10 converts to ITS2 C15	SSCP of LUS & cloning, DGGE of ITS2 & sequencing	Stat 2008 CoralReefs Symbiont acquisition strategy drives the genetic diversity of Symbiodinium in hosts	2001-08-01	8	2001	8	2001	Yes	spawner	gonochore
9619	Porites evermanni	ITS2	C15	37.5926	n/a	Oahu	Eastern Indo-Pacific	Hawaii	Hawaii	5-20	5	20	21.4667	-157.983	Normal Cond	Aquarist		Article does not say where each sample was from, but all sites (Kaneohe Bay, Haleiwa Trench, and Wailua Bay) are off the island of Oahu	DGGE of ITS2 & sequencing	LaJeunesse 2004 CoralReefs High diversity and host specificity observed among symbiotic	<10-2003	NA	NA	NA	NA	Yes	spawner	gonochore
16489	Porites harrisoni	ITS2	C15	37.5926	NA	Musandam	Western Indo-Pacific	Red Sea and Gulf of Aden	Southern Red Sea	2-7'	2	7	26.1	56.25	Unknown	Original pub			DGGE of ITS2 & sequencing	D’Angelo 2015 ISME Local adaptation constrains the distribution potential	Sept 2012 and March 2013	9	2012	3	2013	NA	NA	NA
9794	Porites lichen	ITS2	C15	37.5926	NA	Rib Reef GBR	Central Indo-Pacific	Northeast Australian Shelf	Central and Southern Great Barrier Reef	10-17'	10	17	-18	147	Normal Cond	Riddle 2011			DGGE of ITS2 & sequencing	LaJeunesse 2004 MEPS Closely related Symbiodinium spp differ in relative dominance	May (2003)	5	2003	5	2003	Yes	brooder	hermaphrodite
2705	Porites lobata	ITS2	C15	37.5926	NA	Changuu	Western Indo-Pacific	Western Indian Ocean	East African Coral Coast	2-6	2	6	-6.12007	39.1681	Normal Cond	Geosymbio	same_as_AY239369		DGGE of ITS2 & sequencing	LaJeunesse 2010 JBiogeograph Long-standing environmental conditions isolation and host–symbiont specificity	2007-04-01	4	2007	4	2007	Yes	spawner	gonochore
3051	Porites lutea	ITS2	C15	37.5926	NA	Zamami Island, Japan	Central Indo-Pacific	South Kuroshio	South Kuroshio	1-10	1	10	26.2346	127.305	Normal Cond	Aquarist			DGGE of ITS2 & sequencing	LaJeunesse 2004 MEPS Closely related Symbiodinium spp differ in relative dominance	March (2002)	3	2002	3	2002	Yes	spawner	gonochore
8855	Porites mayeri	ITS2	C15	37.5926	NA	Heron Island	Central Indo-Pacific	Northeast Australian Shelf	Central and Southern GBR	3	3	3	-23	152	Normal Cond	Original pub			DGGE of ITS2 & sequencing	LaJeunesse 2003 LimnolOceanogr Low symbiont diversity in southern Great Barrier Reef	Feb and March 2002	2	2002	3	2002	NA	NA	NA
X90	Porites monticulosa	ITS2	C15	37.5926	NA	Tuléar	Western Indo-Pacific	Western Indian Ocean	Western and Northern Madagascar		1	30	-23.3	43.6	Normal conditions	Original publication		collected at SCUBA depths	DGGE of ITS2 & sequencing	Boonstra 2011 Diss Latitudinal Patterns in the Distribution of Algal Symbionts		9	2001	9	2001	Yes	spawner	gonochore
2731	Porites nigrescens	ITS2	C15	37.5926	NA	Ko Phi Phi Don	Western Indo-Pacific	Andaman	Andaman Sea Coral Coast	2-6	2	6	7.7333	98.7667	Normal Cond	Geosymbio	same_as_AY239369		DGGE of ITS2 & sequencing	LaJeunesse 2010 JBiogeograph Long-standing environmental conditions isolation and host–symbiont specificity	2007-02-01	2	2007	2	2007	Yes	NA	NA
X91	Porites profundus	ITS2	C15	37.5926	NA	Zanzibar	Western Indo-Pacific	Western Indian Ocean	East African Coral Coast		1	7	-6.15262	39.136	Normal Cond	Direct from publication			DGGE of ITS2 & sequencing	Chauka 2012 WIndOceaJMarSci Diversity of Symbiodinium in Tanzania		4	2008	4	2008	Yes	NA	NA
15563	Porites rus	ITS2	C15	37.5926	NA	Nosy Bé	Western Indo-Pacific	Western Indian Ocean	Western and Northern Madagascar		1	30	-13.4	48	Normal conditions	Original publication		collected at SCUBA depths	DGGE of ITS2 & sequencing	Boonstra 2011 Diss Latitudinal Patterns in the Distribution of Algal Symbionts		9	2001	9	2001	Yes	spawner	gonochore
9796	Porites silimaniana	ITS2	C15	37.5926	NA	Zamami Island, Japan	Central Indo-Pacific	South Kuroshio	South Kuroshio	1-10	1	10	26.2346	127.305	Normal Cond	Riddle 2011			DGGE of ITS2 & sequencing	LaJeunesse 2004 MEPS Closely related Symbiodinium spp differ in relative dominance	March (2002)	3	2002	3	2002	Yes	brooder	gonochore
17614	Porites solida	ITS2	C15	37.5926	NA	Moorea	Eastern Indo-Pacific	Central Polynesia	Society Islands	1	1	1	-17.4772	-149.802	Normal Conditions	Original Pub	HE579013	LG2	Cloning of ITS2 & sequencing	Putnam 2012 ProcRSocB Endosymbiotic flexibility associates with environ sensitivity	<6-2012	NA	NA	NA	NA	NA	spawner	gonochore
9193	Porites stephensoni	ITS2	C15	37.5926	NA	Ko Phi Phi Don	Western Indo-Pacific	Andaman	Andaman Sea Coral Coast	2-6	2	6	7.7333	98.7667	Normal Cond	Geosymbio			DGGE of ITS2 & sequencing	LaJeunesse 2010 JBiogeograph Long-standing environmental conditions isolation and host–symbiont specificity	2007-02-01	2	2007	2	2007	Yes	brooder	gonochore
9797	Porites vaughani	ITS2	C15	37.5926	NA	Rib Reef GBR	Central Indo-Pacific	Northeast Australian Shelf	Central and Southern Great Barrier Reef	1-8'	1	8	-18	147	Normal Cond	Riddle 2011			DGGE of ITS2 & sequencing	LaJeunesse 2004 MEPS Closely related Symbiodinium spp differ in relative dominance	May (2003)	5	2003	5	2003	Yes	NA	NA
15459	Seriatopora hystrix	ITS2	C15	37.5926	NA	NA	NA	NA	NA	NA	NA	NA	NA	NA	Normal Cond	Original pub		Held in capticivity at aquarium for up to 18 years	DGGE of ITS2 & sequencing	Smith 2009 JPhycol symbiodinium (dinophyta) diversity and stability in aquarium	<10-2008	NA	NA	NA	NA	Yes	brooder	hermaphrodite
X92	Montipora capitata	ITS2	FDia11	38.3648	NA	Hawaii	Eastern Indo-Pacific	Hawaii	Hawaii	NA	NA	NA	NA	NA	NA	Original pub		Same as F1	NA	LaJeunesse 2001 JPhycol Investigating the biodiversity	NA	NA	NA	NA	NA	Yes	spawner	hermaphrodite
2556	Coelastrea aspera	ITS2	C119	39.5111	NA	Cape Panwa	Western Indo-Pacific	Andaman	Andaman Sea Coral Coast	0-5	0	5	7.8073	98.4092	Normal Cond	Geosymbio	GU111900		DGGE of ITS2 & sequencing	LaJeunesse 2010 JBiogeograph Long-standing environmental conditions isolation and host–symbiont specificity	2007-02-01	2	2007	2	2007	No	spawner	hermaphrodite
5200	Pocillopora damicornis	ITS2	C125	39.5111	NA	Abrolhos Islands	Temperate Australasia	West Central Australian Shelf	Shark Bay	<7	0	7	-28.6382	113.865	Normal Cond		EU597011		DGGE of ITS2 & sequencing	Silverstein 2011 MEPS Novel algal symbiont diversity in reef corals of Western Australia	2005-07-01	7	2005	7	2005	Yes	brooder	hermaphrodite
5202	Pocillopora damicornis	ITS2	C126	39.5111	NA	Abrolhos Islands	Temperate Australasia	West Central Australian Shelf	Shark Bay	<7	0	7	-28.6382	113.865	Normal Cond		EU597012		DGGE of ITS2 & sequencing	Silverstein 2011 MEPS Novel algal symbiont diversity in reef corals of Western Australia	2005-07-01	7	2005	7	2005	Yes	brooder	hermaphrodite
5226	Favites abdita	ITS2	C129	39.5111	NA	Abrolhos Islands	Temperate Australasia	West Central Australian Shelf	Shark Bay	<7	0	7	-28.6382	113.865	Normal Cond		HQ385805		DGGE of ITS2 & sequencing	Silverstein 2011 MEPS Novel algal symbiont diversity in reef corals of Western Australia	2005-07-01	7	2005	7	2005	No	spawner	hermaphrodite
9624	Acropora aculeus	ITS2	C3h	39.5111	NA	Curaçao Island	Central Indo-Pacific	Northeast Australian Shelf	Central and Southern Great Barrier Reef	1-6	1	6	-18.67	146.549	Normal Cond	Riddle 2011			DGGE of ITS2 & sequencing	LaJeunesse 2004 MEPS Closely related Symbiodinium spp differ in relative dominance	May (2003)	5	2003	5	2003	No	spawner	hermaphrodite
X93	Acropora intermedia	ITS2	C3h	39.5111	NA	Kenting National Park, Taiwan	Central Indo-Pacific	South Kuroshio	South Kuroshio	< 5m	0	5	21.9317	120.746	Exposed to warm water outflow from nuclear power plant	Original Publication			DGGE of ITS2 & sequencing	Wang 2011 MEPS Photosystem II breakdown induced by reactiveoxygen species in freshly-isolated Symbiodiniumfrom Montipora(Scleractinia; Acroporidae)	Between October 2008 and June 2009	10	2008	6	2009	No	spawner	hermaphrodite
9686	Caulastrea furcata	ITS2	C3h	39.5111	NA	Curaçao Island	Central Indo-Pacific	Northeast Australian Shelf	Central and Southern Great Barrier Reef	1-6	1	6	-18.67	146.549	Normal Cond	Riddle 2011			DGGE of ITS2 & sequencing	LaJeunesse 2004 MEPS Closely related Symbiodinium spp differ in relative dominance	May (2003)	5	2003	5	2003	No	spawner	hermaphrodite
9689	Ctenactis echinata	ITS2	C3h	39.5111	NA	Curaçao Island	Central Indo-Pacific	Northeast Australian Shelf	Central and Southern Great Barrier Reef	1-6	1	6	-18.67	146.549	Normal Cond	Riddle 2011			DGGE of ITS2 & sequencing	LaJeunesse 2004 MEPS Closely related Symbiodinium spp differ in relative dominance	May (2003)	5	2003	5	2003	No	spawner	gonochore
9696	Danafungia horrida	ITS2	C3h	39.5111	NA	Curaçao Island	Central Indo-Pacific	Northeast Australian Shelf	Central and Southern Great Barrier Reef	1-6	1	6	-18.67	146.549	Normal Cond	Aquarist			DGGE of ITS2 & sequencing	LaJeunesse 2004 MEPS Closely related Symbiodinium spp differ in relative dominance	May (2003)	5	2003	5	2003	No	spawner	gonochore
2986	Echinophyllia aspera	ITS2	C3h	39.5111	NA	Curaçao Island	Central Indo-Pacific	Northeast Australian Shelf	Central and Southern Great Barrier Reef	1-6	1	6	-18.67	146.549	Normal Cond	Aquarist			DGGE of ITS2 & sequencing	LaJeunesse 2004 MEPS Closely related Symbiodinium spp differ in relative dominance	May (2003)	5	2003	5	2003	No	spawner	hermaphrodite
9699	Echinophyllia orpheensis	ITS2	C3h	39.5111	NA	Feather Reef GBR	Central Indo-Pacific	Northeast Australian Shelf	Central and Southern Great Barrier Reef	10-17'	10	17	-18	146	Normal Cond	Riddle 2011			DGGE of ITS2 & sequencing	LaJeunesse 2004 MEPS Closely related Symbiodinium spp differ in relative dominance	May (2003)	5	2003	5	2003	No	spawner	hermaphrodite
2989	Echinopora gemmacea	ITS2	C3h	39.5111	NA	Feather Reef GBR	Central Indo-Pacific	Northeast Australian Shelf	Central and Southern Great Barrier Reef	10–17	10	17	-17.5083	146.377	Normal Cond	SymbioGBR			DGGE of ITS2 & sequencing	LaJeunesse 2004 MEPS Closely related Symbiodinium spp differ in relative dominance	May (2003)	5	2003	5	2003	No	spawner	hermaphrodite
2994	Favites abdita	ITS2	C3h	39.5111	NA	Feather Reef GBR	Central Indo-Pacific	Northeast Australian Shelf	Central and Southern Great Barrier Reef	1-8'	1	8	-18	146	Normal Cond	Aquarist			DGGE of ITS2 & sequencing	LaJeunesse 2004 MEPS Closely related Symbiodinium spp differ in relative dominance	May (2003)	5	2003	5	2003	No	spawner	hermaphrodite
2996	Fungia fungites	ITS2	C3h	39.5111	NA	Feather Reef GBR	Central Indo-Pacific	Northeast Australian Shelf	Central and Southern Great Barrier Reef	10-17'	10	17	-18	146	Normal Cond	Aquarist			DGGE of ITS2 & sequencing	LaJeunesse 2004 MEPS Closely related Symbiodinium spp differ in relative dominance	May (2003)	5	2003	5	2003	No	spawner	gonochore
9719	Goniastrea pectinata	ITS2	C3h	39.5111	NA	Feather Reef GBR	Central Indo-Pacific	Northeast Australian Shelf	Central and Southern Great Barrier Reef	10-17'	10	17	-18	146	Normal Cond	Riddle 2011			DGGE of ITS2 & sequencing	LaJeunesse 2004 MEPS Closely related Symbiodinium spp differ in relative dominance	May (2003)	5	2003	5	2003	No	spawner	hermaphrodite
9726	Heliofungia actiniformis	ITS2	C3h	39.5111	NA	Curaçao Island	Central Indo-Pacific	Northeast Australian Shelf	Central and Southern Great Barrier Reef	1-6	1	6	-18.67	146.549	Normal Cond	Riddle 2011			DGGE of ITS2 & sequencing	LaJeunesse 2004 MEPS Closely related Symbiodinium spp differ in relative dominance	May (2003)	5	2003	5	2003	Mixed	Mixed	gonochore
3007	Hydnophora exesa	ITS2	C3h	39.5111	NA	Feather Reef GBR	Central Indo-Pacific	Northeast Australian Shelf	Central and Southern Great Barrier Reef	1-8'	1	8	-18	146	Normal Cond	Aquarist			DGGE of ITS2 & sequencing	LaJeunesse 2004 MEPS Closely related Symbiodinium spp differ in relative dominance	May (2003)	5	2003	5	2003	No	spawner	hermaphrodite
9731	Leptastrea pruinosa	ITS2	C3h	39.5111	NA	Feather Reef GBR	Central Indo-Pacific	Northeast Australian Shelf	Central and Southern Great Barrier Reef	10–17	10	17	-17.5083	146.377	Normal Cond	Riddle 2011			DGGE of ITS2 & sequencing	LaJeunesse 2004 MEPS Closely related Symbiodinium spp differ in relative dominance	May (2003)	5	2003	5	2003	No	spawner	gonochore
9735	Leptoseris yabei	ITS2	C3h	39.5111	NA	Feather Reef GBR	Central Indo-Pacific	Northeast Australian Shelf	Central and Southern Great Barrier Reef	10–17	10	17	-17.5083	146.377	Normal Cond	Riddle 2011			DGGE of ITS2 & sequencing	LaJeunesse 2004 MEPS Closely related Symbiodinium spp differ in relative dominance	May (2003)	5	2003	5	2003	No	spawner	gonochore
3016	Lobophyllia hemprichii	ITS2	C3h	39.5111	NA	Feather Reef GBR	Central Indo-Pacific	Northeast Australian Shelf	Central and Southern Great Barrier Reef	10-17'	10	17	-18	146	Normal Cond	Aquarist			DGGE of ITS2 & sequencing	LaJeunesse 2004 MEPS Closely related Symbiodinium spp differ in relative dominance	May (2003)	5	2003	5	2003	No	spawner	hermaphrodite
3027	Mycedium elephantotus	ITS2	C3h	39.5111	NA	Rib Reef GBR	Central Indo-Pacific	Northeast Australian Shelf	Central and Southern Great Barrier Reef	10-17'	10	17	-18	147	Normal Cond	Aquarist			DGGE of ITS2 & sequencing	LaJeunesse 2004 MEPS Closely related Symbiodinium spp differ in relative dominance	May (2003)	5	2003	5	2003	No	spawner	hermaphrodite
9756	Oulophyllia crispa	ITS2	C3h	39.5111	NA	Curaçao Island	Central Indo-Pacific	Northeast Australian Shelf	Central and Southern Great Barrier Reef	1-6	1	6	-18.67	146.549	Normal Cond	Riddle 2011			DGGE of ITS2 & sequencing	LaJeunesse 2004 MEPS Closely related Symbiodinium spp differ in relative dominance	May (2003)	5	2003	5	2003	no	spawner	hermaphrodite
9757	Oxypora lacera	ITS2	C3h	39.5111	NA	Feather Reef GBR	Central Indo-Pacific	Northeast Australian Shelf	Central and Southern Great Barrier Reef	10-17'	10	17	-18	146	Normal Cond	Riddle 2011			DGGE of ITS2 & sequencing	LaJeunesse 2004 MEPS Closely related Symbiodinium spp differ in relative dominance	May (2003)	5	2003	5	2003	No	spawner	hermaphrodite
9762	Pachyseris rugosa	ITS2	C3h	39.5111	NA	Curaçao Island	Central Indo-Pacific	Northeast Australian Shelf	Central and Southern Great Barrier Reef	1-6	1	6	-18.67	146.549	Normal Cond	Riddle 2011			DGGE of ITS2 & sequencing	LaJeunesse 2004 MEPS Closely related Symbiodinium spp differ in relative dominance	May (2003)	5	2003	5	2003	No	spawner	gonochore
9765	Pachyseris speciosa	ITS2	C3h	39.5111		Feather Reef GBR	Central Indo-Pacific	Northeast Australian Shelf	Central and Southern Great Barrier Reef	10–17	10	17	-17.5083	146.377	Normal Cond	Riddle 2011			DGGE of ITS2 & sequencing	LaJeunesse 2004 MEPS Closely related Symbiodinium spp differ in relative dominance	May (2003)	5	2003	5	2003	no	spawner	gonochore
9771	Pavona explanulata	ITS2	C3h	39.5111	NA	Feather Reef GBR	Central Indo-Pacific	Northeast Australian Shelf	Central and Southern Great Barrier Reef	10–17	10	17	-17.5083	146.377	Normal Cond	Riddle 2011			DGGE of ITS2 & sequencing	LaJeunesse 2004 MEPS Closely related Symbiodinium spp differ in relative dominance	May (2003)	5	2003	5	2003	No	spawner	gonochore
8852	Pavona maldivensis	ITS2	C3h	39.5111	NA	Heron Island	Central Indo-Pacific	Northeast Australian Shelf	Central and Southern GBR	10	10	10	-23	152	Normal Cond	Original pub			DGGE of ITS2 & sequencing	LaJeunesse 2003 LimnolOceanogr Low symbiont diversity in southern Great Barrier Reef	Feb and March 2002	2	2002	3	2002	No	spawner	gonochore
9773	Pectinia lactuca	ITS2	C3h	39.5111	NA	Curaçao Island	Central Indo-Pacific	Northeast Australian Shelf	Central and Southern Great Barrier Reef	1-6	1	6	-18.67	146.549	Normal Cond	Riddle 2011			DGGE of ITS2 & sequencing	LaJeunesse 2004 MEPS Closely related Symbiodinium spp differ in relative dominance	May (2003)	5	2003	5	2003	No	spawner	hermaphrodite
9774	Pectinia paeonia	ITS2	C3h	39.5111	NA	Feather Reef GBR	Central Indo-Pacific	Northeast Australian Shelf	Central and Southern Great Barrier Reef	10-17'	10	17	-18	146	Normal Cond	Riddle 2011			DGGE of ITS2 & sequencing	LaJeunesse 2004 MEPS Closely related Symbiodinium spp differ in relative dominance	May (2003)	5	2003	5	2003	No	spawner	hermaphrodite
3031	Platygyra daedalea	ITS2	C3h	39.5111	NA	Curaçao Island	Central Indo-Pacific	Northeast Australian Shelf	Central and Southern Great Barrier Reef	1-6	1	6	-18.67	146.549	Normal Cond	Aquarist			DGGE of ITS2 & sequencing	LaJeunesse 2004 MEPS Closely related Symbiodinium spp differ in relative dominance	May (2003)	5	2003	5	2003	No	spawner	hermaphrodite
9777	Platygyra pini	ITS2	C3h	39.5111	NA	Rib Reef GBR	Central Indo-Pacific	Northeast Australian Shelf	Central and Southern Great Barrier Reef	10-17'	10	17	-18	147	Normal Cond	Riddle 2011			DGGE of ITS2 & sequencing	LaJeunesse 2004 MEPS Closely related Symbiodinium spp differ in relative dominance	May (2003)	5	2003	5	2003	No	spawner	hermaphrodite
9778	Platygyra ryukyuensis	ITS2	C3h	39.5111	NA	Feather Reef GBR	Central Indo-Pacific	Northeast Australian Shelf	Central and Southern Great Barrier Reef	10-17'	10	17	-18	146	Normal Cond	Riddle 2011			DGGE of ITS2 & sequencing	LaJeunesse 2004 MEPS Closely related Symbiodinium spp differ in relative dominance	May (2003)	5	2003	5	2003	No	spawner	hermaphrodite
9780	Pleuractis paumotensis	ITS2	C3h	39.5111	NA	Curaçao Island	Central Indo-Pacific	Northeast Australian Shelf	Central and Southern Great Barrier Reef	1-6	1	6	-18.67	146.549	Normal Cond	Aquarist			DGGE of ITS2 & sequencing	LaJeunesse 2004 MEPS Closely related Symbiodinium spp differ in relative dominance	May (2003)	5	2003	5	2003	NA	spawner	gonochore
3055	Sandalolitha robusta	ITS2	C3h	39.5111	NA	Rib Reef GBR	Central Indo-Pacific	Northeast Australian Shelf	Central and Southern Great Barrier Reef	10-17'	10	17	-18	147	Normal Cond	Riddle 2011			DGGE of ITS2 & sequencing	LaJeunesse 2004 MEPS Closely related Symbiodinium spp differ in relative dominance	May (2003)	5	2003	5	2003	No	spawner	gonochore
X94	Seriatopora hystrix	ITS2	C3n	39.5111	NA	Lizard Island, GBR	Central Indo-Pacific	Northeast Australian Shelf	Torres Strait Northern Great Barrier Reef	27	27	27	-14.6166	145.636	Normal Conditions				DGGE of ITS2 & sequencing	Tonk 2014 JPhycol Symbiodinium diversity in reef invertebrates		10	2007	9	2008	Yes	brooder	hermaphrodite
15474	Acropora cervicornis	ITS2	C94a	39.5111	NA	NA	NA	NA	NA	NA	NA	NA	NA	NA	Normal Cond	Original pub		Held in capticivity at aquarium for up to 18 years	DGGE of ITS2 & sequencing	Smith 2009 JPhycol symbiodinium (dinophyta) diversity and stability in aquarium	<10-2008	NA	NA	NA	NA	No	spawner	hermaphrodite
X95	Acropora granulosa	ITS2	C94a	39.5111	NA	NA	NA	NA	NA	NA	NA	NA	NA	NA	Normal Cond	Original pub		Held in capticivity at aquarium for up to 18 years	DGGE of ITS2 & sequencing	Smith 2009 JPhycol symbiodinium (dinophyta) diversity and stability in aquarium	<10-2008	NA	NA	NA	NA	No	spawner	hermaphrodite
15475	Acropora humilis	ITS2	C94a	39.5111	NA	NA	NA	NA	NA	NA	NA	NA	NA	NA	Normal Cond	Original pub		Held in capticivity at aquarium for up to 18 years	DGGE of ITS2 & sequencing	Smith 2009 JPhycol symbiodinium (dinophyta) diversity and stability in aquarium	<10-2008	NA	NA	NA	NA	No	spawner	hermaphrodite
2456	Acropora hyacinthus	ITS2	C94a	39.5111	NA	Koh Hae	Western Indo-Pacific	Andaman	Andaman Sea Coral Coast	2-6	2	6	7.7456	98.3763	Normal Cond	Geosymbio	GU111877		DGGE of ITS2 & sequencing	LaJeunesse 2010 JBiogeograph Long-standing environmental conditions isolation and host–symbiont specificity	2007-02-01	2	2007	2	2007	No	spawner	hermaphrodite
15476	Acropora millepora	ITS2	C94a	39.5111	NA	NA	NA	NA	NA	NA	NA	NA	NA	NA	Normal Cond	Original pub		Held in capticivity at aquarium for up to 18 years	DGGE of ITS2 & sequencing	Smith 2009 JPhycol symbiodinium (dinophyta) diversity and stability in aquarium	<10-2008	NA	NA	NA	NA	No	spawner	hermaphrodite
15477	Acropora valida	ITS2	C94a	39.5111	NA	NA	NA	NA	NA	NA	NA	NA	NA	NA	Normal Cond	Original pub		Held in capticivity at aquarium for up to 18 years	DGGE of ITS2 & sequencing	Smith 2009 JPhycol symbiodinium (dinophyta) diversity and stability in aquarium	<10-2008	NA	NA	NA	NA	No	spawner	hermaphrodite
2683	Pocillopora eydouxi	ITS2	D1-11	39.5111	NA	Cape Panwa	Western Indo-Pacific	Andaman	Andaman Sea Coral Coast	0-5	0	5	7.8073	98.4092	Normal Cond	Geosymbio	same_as_EU812740		DGGE of ITS2 & sequencing	LaJeunesse 2010 JBiogeograph Long-standing environmental conditions isolation and host–symbiont specificity	2007-02-01	2	2007	2	2007	Yes	spawner	hermaphrodite
2529	Favites abdita	ITS2	D1-4-10	39.5111	NA	Cape Panwa	Western Indo-Pacific	Andaman	Andaman Sea Coral Coast	0-5	0	5	7.8073	98.4092	Normal Cond	Geosymbio	same_as_AF499802		DGGE of ITS2 & sequencing	LaJeunesse 2010 JBiogeograph Long-standing environmental conditions isolation and host–symbiont specificity	2007-02-01	2	2007	2	2007	No	spawner	hermaphrodite
9026	Favites valenciennesi	ITS2	D1-4-10	39.5111	NA	Cape Panwa	Western Indo-Pacific	Andaman	Andaman Sea Coral Coast	0-5	0	5	7.8073	98.4092	Normal Cond	Geosymbio			DGGE of ITS2 & sequencing	LaJeunesse 2010 JBiogeograph Long-standing environmental conditions isolation and host–symbiont specificity	2007-02-01	2	2007	2	2007	no	spawner	hermaphrodite
9232	Goniastrea favulus	ITS2	D1-4-10	39.5111	NA	Cape Panwa	Western Indo-Pacific	Andaman	Andaman Sea Coral Coast	0-5	0	5	7.8073	98.4092	Normal Cond	Geosymbio			DGGE of ITS2 & sequencing	LaJeunesse 2010 JBiogeograph Long-standing environmental conditions isolation and host–symbiont specificity	2007-02-01	2	2007	2	2007	No	spawner	hermaphrodite
9157	Platygyra pini	ITS2	D1-4-10	39.5111	NA	Cape Panwa	Western Indo-Pacific	Andaman	Andaman Sea Coral Coast	0-5	0	5	7.8073	98.4092	Normal Cond	Geosymbio			DGGE of ITS2 & sequencing	LaJeunesse 2010 JBiogeograph Long-standing environmental conditions isolation and host–symbiont specificity	2007-02-01	2	2007	2	2007	No	spawner	hermaphrodite
2665	Platygyra sinensis	ITS2	D1-4-10	39.5111	NA	Cape Panwa	Western Indo-Pacific	Andaman	Andaman Sea Coral Coast	0-5	0	5	7.8073	98.4092	Normal Cond	Geosymbio	same_as_EU449061		DGGE of ITS2 & sequencing	LaJeunesse 2010 JBiogeograph Long-standing environmental conditions isolation and host–symbiont specificity	2007-02-01	2	2007	2	2007	No	spawner	hermaphrodite
X96	Montipora verrucosa	ITS2	F1	39.8404	NA	Hawaii	Eastern Indo-Pacific	Hawaii	Hawaii	NA	NA	NA	NA	NA	NA	Original pub			NA	LaJeunesse 2001 JPhycol Investigating the biodiversity	NA	NA	NA	NA	NA	Yes	spawner	hermaphrodite
17905	Acropora clathrata	ITS2	C21	40.252	NA	Saadiyat Reef	Western Indo-Pacific	Somali/Arabian	Arabian (Persian) Gulf	4	4	4	24.4743	54.3823	Normal Cond	Direct from Publication			Cloning of ITS2 & sequencing	Hume 2013 MarPollBull Corals from the Persian Gulf as models for thermotolerant	2010	NA	2010	NA	2010	No	spawner	hermaphrodite
17257	Acropora hyacinthus	ITS2	C21	40.252	NA	Moorea	Eastern Indo-Pacific	Central Polynesia	Society Islands	7	7	7	-17.5475	-149.769	Normal Conditions	Original Pub	HE579028	FR4	Cloning of ITS2 & sequencing	Putnam 2012 ProcRSocB Endosymbiotic flexibility associates with environ sensitivity	<6-2012	NA	NA	NA	NA	No	spawner	hermaphrodite
9644	Acropora latistella	ITS2	C21	40.252	NA	Curaçao Island	Central Indo-Pacific	Northeast Australian Shelf	Central and Southern Great Barrier Reef	1-6	1	6	-18.67	146.549	Normal Cond	Riddle 2011			DGGE of ITS2 & sequencing	LaJeunesse 2004 MEPS Closely related Symbiodinium spp differ in relative dominance	May (2003)	5	2003	5	2003	No	spawner	hermaphrodite
15465	Acropora microphthalma	ITS2	C21	40.252	NA	NA	NA	NA	NA	NA	NA	NA	NA	NA	Normal Cond	Original pub		Held in capticivity at aquarium for up to 18 years	DGGE of ITS2 & sequencing	Smith 2009 JPhycol symbiodinium (dinophyta) diversity and stability in aquarium	<10-2008	NA	NA	NA	NA	No	spawner	hermaphrodite
15466	Acropora millepora	ITS2	C21	40.252	NA	NA	NA	NA	NA	NA	NA	NA	NA	NA	Normal Cond	Original pub		Held in capticivity at aquarium for up to 18 years	DGGE of ITS2 & sequencing	Smith 2009 JPhycol symbiodinium (dinophyta) diversity and stability in aquarium	<10-2008	NA	NA	NA	NA	No	spawner	hermaphrodite
X97	Acropora striata	ITS2	C21	40.252	NA	Moorea	Eastern Indo-Pacific	Central Polynesia	Society Islands	7	7	7	-17.4772	-149.802	Normal Conditions	Original Pub		FR1	Cloning of ITS2 & sequencing	Putnam 2012 ProcRSocB Endosymbiotic flexibility associates with environ sensitivity	<6-2012	NA	NA	NA	NA	No	spawner	hermaphrodite
15467	Acropora tenuis	ITS2	C21	40.252	NA	NA	NA	NA	NA	NA	NA	NA	NA	NA	Normal Cond	Original pub		Held in capticivity at aquarium for up to 18 years	DGGE of ITS2 & sequencing	Smith 2009 JPhycol symbiodinium (dinophyta) diversity and stability in aquarium	<10-2008	NA	NA	NA	NA	No	spawner	hermaphrodite
17394	Astrea curta	ITS2	C21	40.252	NA	Moorea	Eastern Indo-Pacific	Central Polynesia	Society Islands	2	2	2	-17.485	-149.834	Normal Conditions	Original Pub	HE579027	FG2	Cloning of ITS2 & sequencing	Putnam 2012 ProcRSocB Endosymbiotic flexibility associates with environ sensitivity	<6-2012	NA	NA	NA	NA	No	spawner	hermaphrodite
8816	Dipsastraea favus	ITS2	C21	40.252	NA	Heron Island	Central Indo-Pacific	Northeast Australian Shelf	Central and Southern GBR	3	3	3	-23	152	Normal Cond	Original pub			DGGE of ITS2 & sequencing	LaJeunesse 2003 LimnolOceanogr Low symbiont diversity in southern Great Barrier Reef	Feb and March 2002	2	2002	3	2002	NA	NA	NA
3139	Echinophyllia aspera	ITS2	C21	40.252	17	Heron Island, GBR	Central Indo-Pacific	Northeast Australian Shelf	Central and Southern GBR	3	3	3	-23	152	Normal Cond	Aquarist			DGGE of ITS2 & sequencing	LaJeunesse 2003 LimnolOceanogr Low symbiont diversity in southern Great Barrier Reef	Feb-Mar 2002	2	2002	3	2002	No	spawner	hermaphrodite
14082	Echinopora lamellosa	ITS2	C21	40.252	NA	Ningaloo	Centra Indo-Pacific	Northwest Australian Shelf	Ningaloo	<7	0	7	-22.867	113.746	Normal Cond				DGGE of ITS2 & sequencing	Silverstein 2011 MEPS Novel algal symbiont diversity in reef corals of Western Australia	2005-06-01	6	2005	6	2005	No	spawner	hermaphrodite
5377	Favites abdita	ITS2	C21	40.252	NA	Heron Reef, GBR	Central Indo-Pacific	Northeast Australian Shelf	Central and Southern GBR	Intertidal flat	0	1	-23.4167	151.917	Normal Cond	Aquarist		Clsu 1 Converts to ITS2 C21	SSCP of LUS & cloning, DGGE of ITS2 & sequencing	Stat 2008 CoralReefs Symbiont acquisition strategy drives the genetic diversity of Symbiodinium in hosts	2001-08-01	8	2001	8	2001	No	spawner	hermaphrodite
3145	Favites halicora	ITS2	C21	40.252	23	Heron Island, GBR	Central Indo-Pacific	Northeast Australian Shelf	Central and Southern GBR	3	3	3	-23	152	Normal Cond	Aquarist			DGGE of ITS2 & sequencing	LaJeunesse 2003 LimnolOceanogr Low symbiont diversity in southern Great Barrier Reef	Feb-Mar 2002	2	2002	3	2002	no	spawner	hermaphrodite
3146	Fungia fungites	ITS2	C21	40.252	24	Heron Island, GBR	Central Indo-Pacific	Northeast Australian Shelf	Central and Southern GBR	3	3	3	-23	152	Normal Cond	Aquarist			DGGE of ITS2 & sequencing	LaJeunesse 2003 LimnolOceanogr Low symbiont diversity in southern Great Barrier Reef	Feb-Mar 2002	2	2002	3	2002	No	spawner	gonochore
8823	Galaxea acrhelia	ITS2	C21	40.252	NA	Heron Island	Central Indo-Pacific	Northeast Australian Shelf	Central and Southern GBR	3	3	3	-23	152	Normal Cond	Original pub			DGGE of ITS2 & sequencing	LaJeunesse 2003 LimnolOceanogr Low symbiont diversity in southern Great Barrier Reef	Feb and March 2002	2	2002	3	2002	NA	NA	hermaphrodite
17328	Gardineroseris planulata	ITS2	C21	40.252	NA	Moorea	Eastern Indo-Pacific	Central Polynesia	Society Islands	1	1	1	-17.4772	-149.802	Normal Conditions	Original Pub	HE579027	LG2	Cloning of ITS2 & sequencing	Putnam 2012 ProcRSocB Endosymbiotic flexibility associates with environ sensitivity	<6-2012	NA	NA	NA	NA	no	spawner	gonochore
13290	Goniastrea favulus	ITS2	C21	40.252	NA	Heron Reef, GBR	Central Indo-Pacific	Northeast Australian Shelf	Central and Southern GBR	12-15 m	12	15	-23.4167	151.917	Normal Cond	SymbioGBR		Clsu 1 Converts to ITS2 C21	SSCP of LUS & cloning, DGGE of ITS2 & sequencing	Stat 2008 CoralReefs Symbiont acquisition strategy drives the genetic diversity of Symbiodinium in hosts	2001-08-01	8	2001	8	2001	No	spawner	hermaphrodite
17380	Leptastrea purpurea	ITS2	C21	40.252	NA	Moorea	Eastern Indo-Pacific	Central Polynesia	Society Islands	7	7	7	-17.513	-149.767	Normal Conditions	Original Pub	HE579027	FG3	Cloning of ITS2 & sequencing	Putnam 2012 ProcRSocB Endosymbiotic flexibility associates with environ sensitivity	<6-2012	NA	NA	NA	NA	No	spawner	gonochore
17388	Leptastrea transversa	ITS2	C21	40.252	NA	Moorea	Eastern Indo-Pacific	Central Polynesia	Society Islands	2	2	2	-17.485	-149.834	Normal Conditions	Original Pub	HE579027	FG1	Cloning of ITS2 & sequencing	Putnam 2012 ProcRSocB Endosymbiotic flexibility associates with environ sensitivity	<6-2012	NA	NA	NA	NA	NA	spawner	gonochore
X98	Leptoseris mycetoseroides	ITS2	C21	40.252	NA	Moorea	Eastern Indo-Pacific	Central Polynesia	Society Islands	22	22	22	-17.485	-149.834	Normal Conditions	Original Pub		FR3	Cloning of ITS2 & sequencing	Putnam 2012 ProcRSocB Endosymbiotic flexibility associates with environ sensitivity	<6-2012	NA	NA	NA	NA	NA	NA	NA
13316	Lobophyllia corymbosa	ITS2	C21	40.252	NA	One Tree Reef, GBR	Central Indo-Pacific	Northeast Australian Shelf	Central and Southern GBR	12-15 m	12	15	-23.4167	151.917	Normal Cond	SymbioGBR		Clsu 1 Converts to ITS2 C21	SSCP of LUS & cloning, DGGE of ITS2 & sequencing	Stat 2008 CoralReefs Symbiont acquisition strategy drives the genetic diversity of Symbiodinium in hosts	2001-08-01	8	2001	8	2001	No	spawner	hermaphrodite
8836	Merulina ampliata	ITS2	C21	40.252	NA	Heron Island	Central Indo-Pacific	Northeast Australian Shelf	Central and Southern GBR	10	10	10	-23	152	Normal Cond	Original pub			DGGE of ITS2 & sequencing	LaJeunesse 2003 LimnolOceanogr Low symbiont diversity in southern Great Barrier Reef	Feb and March 2002	2	2002	3	2002	No	spawner	hermaphrodite
19881	Montipora capitata	ITS2	C21	40.252	NA	Kaneohe Bay, Oahu, Hawaii	Eastern Indo-Pacific	Hawaii	Hawaii	0-4m	0	4	21.7	-158	Normal Cond	Original publication	FN298460		Cloning of ITS2 & sequencing	Pochon 2010 JPhycol Comparison of endosymbiotic and free-living Symbiodinium diversity in a Hawaiian reef environment	2007-06-15	1	2009	1	2009	Yes	spawner	hermaphrodite
17401	Montipora danae	ITS2	C21	40.252	NA	Moorea	Eastern Indo-Pacific	Central Polynesia	Society Islands	7	7	7	-17.543	-149.774	Normal Conditions	Original Pub	HE579027	FG4	Cloning of ITS2 & sequencing	Putnam 2012 ProcRSocB Endosymbiotic flexibility associates with environ sensitivity	<6-2012	NA	NA	NA	NA	Yes	spawner	hermaphrodite
8847	Montipora foveolata	ITS2	C21	40.252	NA	Heron Island	Central Indo-Pacific	Northeast Australian Shelf	Central and Southern GBR	3	3	3	-23	152	Normal Cond	Original pub			DGGE of ITS2 & sequencing	LaJeunesse 2003 LimnolOceanogr Low symbiont diversity in southern Great Barrier Reef	Feb and March 2002	2	2002	3	2002	Yes	spawner	hermaphrodite
14524	Montipora patula	ITS2	C21	40.252	NA	Johnston Atoll, Hawaii	Eastern Indo-Pacific	Hawaii	Hawaii	3-7 m	3	7	18.078	-169.533	Normal Cond	GenBank	EU449102		Cloning of ITS2 & sequencing	Stat 2009 MEPS Specificity in communities of Symbiodinium in corals from Johnston Atoll	June '06	6	2006	6	2006	Yes	spawner	hermaphrodite
17081	Montipora peltiformis	ITS2	C21	40.252	NA	Port Shelter	Central Indo-Pacific	South China Sea	Southern China	2-4	2	4	22.2	114.167	Normal Cond	Original pub	KT862857		Direct sequencing of ITS2	Wong 2016 RegStudMarSci Symbiodinium clade C generality among common scleractinian corals		6	2013	8	2013	Yes	spawner	hermaphrodite
15468	Pachyseris gemmae	ITS2	C21	40.252	NA	NA	NA	NA	NA	NA	NA	NA	NA	NA	Normal Cond	Original pub		Held in capticivity at aquarium for up to 18 years	DGGE of ITS2 & sequencing	Smith 2009 JPhycol symbiodinium (dinophyta) diversity and stability in aquarium	<10-2008	NA	NA	NA	NA	No	spawner	gonochore
9764	Pachyseris speciosa	ITS2	C21	40.252	NA	Rib Reef GBR	Central Indo-Pacific	Northeast Australian Shelf	Central and Southern Great Barrier Reef	10-17	10	17	-18.4781	146.871	Normal Cond	Riddle 2011			DGGE of ITS2 & sequencing	LaJeunesse 2004 MEPS Closely related Symbiodinium spp differ in relative dominance	May (2003)	5	2003	5	2003	no	spawner	gonochore
9770	Pavona explanulata	ITS2	C21	40.252	NA	Feather Reef GBR	Central Indo-Pacific	Northeast Australian Shelf	Central and Southern Great Barrier Reef	10–17	10	17	-17.5083	146.377	Normal Cond	Riddle 2011			DGGE of ITS2 & sequencing	LaJeunesse 2004 MEPS Closely related Symbiodinium spp differ in relative dominance	May (2003)	5	2003	5	2003	No	spawner	gonochore
17450	Pavona varians	ITS2	C21	40.252	NA	Moorea	Eastern Indo-Pacific	Central Polynesia	Society Islands	21	21	21	-17.5475	-149.769	Normal Conditions	Original Pub	HE579027	FR4	Cloning of ITS2 & sequencing	Putnam 2012 ProcRSocB Endosymbiotic flexibility associates with environ sensitivity	<6-2012	NA	NA	NA	NA	No	spawner	gonochore
5587	Pocillopora damicornis	ITS2	C21	40.252	NA	Johnston Atoll, Hawaii	Eastern Indo-Pacific	Hawaii	Hawaii	2-4 m	2	4	18.078	-169.533	Normal Cond	Aquarist	EU449102		Cloning of ITS2 & sequencing	Stat 2009 MEPS Specificity in communities of Symbiodinium in corals from Johnston Atoll	June '06	6	2006	6	2006	Yes	brooder	hermaphrodite
13946	Porites lobata	ITS2	C21	40.252	214	Pearl & Hermes	Eastern Indo-Pacific	Hawaii	Hawaii	1-8	1	8	27.55.580	-175.52.587	Normal Conditions	Original publication		21 Intermediate TSA	Cloning of ITS2 & sequencing	Stat 2013 Ecol&Evol Distribution of the thermally tolerant symbiont lineage Symbiodinium in corals from Hawaii	2007-08-01	8	2007	8	2007	Yes	spawner	gonochore
15130	Acropora cerealis	ITS2	D1	43.8224	NA	Xiaodonghai Bay	Central Indo-Pacific	South China Sea	Gulf of Tonkin	1-10 m	1	10	18.2065	109.504	Normal conditions	Original pub			DGGE of ITS2 & sequencing	Zhou 2011 JSysEvol Low genetic diversity of symbiotic dinoflagellates	Oct '08	10	2008	10	2008	No	spawner	hermaphrodite
17213	Acropora cytherea	ITS2	D1	43.8224	NA	Moorea	Eastern Indo-Pacific	Central Polynesia	Society Islands	2	2	2	-17.485	-149.834	Normal Conditions	Original Pub	HE579036	FG1	Cloning of ITS2 & sequencing	Putnam 2012 ProcRSocB Endosymbiotic flexibility associates with environ sensitivity	<6-2012	NA	NA	NA	NA	No	spawner	hermaphrodite
17241	Acropora digitifera	ITS2	D1	43.8224	NA	Moorea	Eastern Indo-Pacific	Central Polynesia	Society Islands	9	9	9	-17.475	-149.837	Normal Conditions	Original Pub	HE579036	FR1	Cloning of ITS2 & sequencing	Putnam 2012 ProcRSocB Endosymbiotic flexibility associates with environ sensitivity	<6-2012	NA	NA	NA	NA	No	spawner	hermaphrodite
10032	Acropora muricata	ITS2	D1	43.8224	NA	Zanzibar	Western Indo-Pacific	Western Indian Ocean	East African Coral Coast		1	7	-6.15262	39.136	Normal Cond	Direct from publication			DGGE of ITS2 & sequencing	Chauka 2012 WIndOceaJMarSci Diversity of Symbiodinium in Tanzania		4	2008	4	2008	NA	spawner	hermaphrodite
17266	Acropora pulchra	ITS2	D1	43.8224	NA	Moorea	Eastern Indo-Pacific	Central Polynesia	Society Islands	2	2	2	-17.5146	-149.762	Normal Conditions	Original Pub	HE579036	FR3	Cloning of ITS2 & sequencing	Putnam 2012 ProcRSocB Endosymbiotic flexibility associates with environ sensitivity	<6-2012	NA	NA	NA	NA	No	spawner	hermaphrodite
8230	Acropora tenuis	ITS2	D1	43.8224	NA	Zanzibar	Western Indo-Pacific	Western Indian Ocean	East African Coral Coast		1	7	-6.15262	39.136	Normal Cond	Direct from publication			DGGE of ITS2 & sequencing	Chauka 2012 WIndOceaJMarSci Diversity of Symbiodinium in Tanzania		4	2008	4	2008	No	spawner	hermaphrodite
X99	Acropora striata	ITS2	D1	43.8224	NA	Moorea	Eastern Indo-Pacific	Central Polynesia	Society Islands	9	9	9	-17.4772	-149.802	Normal Conditions	Original Pub		FR1	Cloning of ITS2 & sequencing	Putnam 2012 ProcRSocB Endosymbiotic flexibility associates with environ sensitivity	<6-2012	NA	NA	NA	NA	No	spawner	hermaphrodite
X100	Acropora hemprichi	ITS2	D1	43.8224	NA	Dar es Salaam	Western Indo-Pacific	Western Indian Ocean	East African Coral Coast		1	7	-6.6	39.2	Normal Cond	Direct from publication			DGGE of ITS2 & sequencing	Chauka 2012 WIndOceaJMarSci Diversity of Symbiodinium in Tanzania		8	2008	8	2008	No	spawner	hermaphrodite
8859	Agaricia humilis	ITS2	D1	43.8224	1	Puerto Morelos, Yucatan, Mexico	Tropical Atlantic	Tropical Northwestern Atlantic	Southern Gulf of Mexico	2.5	2.5	2.5	21	-87	Normal Cond	Riddle 2011	NA		DGGE of ITS2 & sequencing	LaJeunesse 2002 MarBiol Diversity and community structure of symbiotic dinoflagellates	Aug 1998, Sep 1999	8	1998	9	1999	yes	brooder	gonochore
17395	Astrea curta	ITS2	D1	43.8224	NA	Moorea	Eastern Indo-Pacific	Central Polynesia	Society Islands	2	2	2	-17.485	-149.834	Normal Conditions	Original Pub	HE579036	FG2	Cloning of ITS2 & sequencing	Putnam 2012 ProcRSocB Endosymbiotic flexibility associates with environ sensitivity	<6-2012	NA	NA	NA	NA	No	spawner	hermaphrodite
11237	Colpophyllia natans	ITS2	D1	43.8224	10m-Cnat-06	Curaçao	Tropical Atlantic	Tropical Northwestern Atlantic	Southern Caribbean	10	10	10	12.1252	-68.9742	Normal Conditions	Original publication			DGGE of ITS2 & sequencing	Bongaerts 2015 RoySocOpenSci Prevalent endosymbiont zoantion		7	2008	8	2008	No	spawner	hermaphrodite
16037	Coscinaraea monile	ITS2	D1	43.8224	NA	Tuléar	Western Indo-Pacific	Western Indian Ocean	Western and Northern Madagascar		1	30	-23.3	43.6	Normal conditions	Original publication		collected at SCUBA depths	DGGE of ITS2 & sequencing	Boonstra 2011 Diss Latitudinal Patterns in the Distribution of Algal Symbionts		11	2009	11	2009	No	spawner	gonochore
15065	Cyphastrea microphthalma	ITS2	D1	43.8224	NA	Hengam Island, Iran	Western Indo-Pacific	Somali/Arabian	Arabian (Persian) Gulf	0.3	0.3	0.3	26.6816	55.8954	Normal Conditions	Direct from Publication		Site 1	DGGE of ITS2 & sequencing	Mashini 2015 JEMBE Comparison of Symbiodinium populations in corals from subtidal	2012-02-17	2	2012	2	2012	No	spawner	hermaphrodite
16069	Favites pentagona	ITS2	D1	43.8224	NA	Vohemar	Western Indo-Pacific	Western Indian Ocean	Western and Northern Madagascar		1	30	-13.4	50	Normal conditions	Original publication		collected at SCUBA depths	DGGE of ITS2 & sequencing	Boonstra 2011 Diss Latitudinal Patterns in the Distribution of Algal Symbionts		9	2001	9	2001	No	spawner	hermaphrodite
15698	Galaxea fascicularis	ITS2	D1	43.8224	NA	Nosy Bé	Western Indo-Pacific	Western Indian Ocean	Western and Northern Madagascar		1	30	-13.4	48	Normal conditions	Original publication		collected at SCUBA depths	DGGE of ITS2 & sequencing	Boonstra 2011 Diss Latitudinal Patterns in the Distribution of Algal Symbionts		3	2007	3	2007	No	spawner	gonochore
15890	Goniastrea stelligera	ITS2	D1	43.8224	NA	Tuléar	Western Indo-Pacific	Western Indian Ocean	Western and Northern Madagascar		1	30	-23.3	43.6	Normal conditions	Original publication		collected at SCUBA depths	DGGE of ITS2 & sequencing	Boonstra 2011 Diss Latitudinal Patterns in the Distribution of Algal Symbionts		3	2007	3	2007	NA	spawner	hermaphrodite
5355	Isopora palifera	ITS2	D1	43.8224	NA	Heron Reef, GBR	Central Indo-Pacific	Northeast Australian Shelf	Central and Southern GBR	12-15 m	12	15	-23.4167	151.917	Normal Cond	SymbioGBR	EF372072	Dlsu2 converts to ITS2 D1	SSCP of LUS & cloning, DGGE of ITS2 & sequencing	Stat 2008 CoralReefs Symbiont acquisition strategy drives the genetic diversity of Symbiodinium in hosts	2001-08-01	8	2001	8	2001	No	brooder	hermaphrodite
16072	Leptastrea purpurea	ITS2	D1	43.8224	NA	Vohemar	Western Indo-Pacific	Western Indian Ocean	Western and Northern Madagascar		1	30	-13.4	50	Normal conditions	Original publication		collected at SCUBA depths	DGGE of ITS2 & sequencing	Boonstra 2011 Diss Latitudinal Patterns in the Distribution of Algal Symbionts		9	2001	9	2001	No	spawner	gonochore
16074	Leptastrea transversa	ITS2	D1	43.8224	NA	Vohemar	Western Indo-Pacific	Western Indian Ocean	Western and Northern Madagascar		1	30	-13.4	50	Normal conditions	Original publication		collected at SCUBA depths	DGGE of ITS2 & sequencing	Boonstra 2011 Diss Latitudinal Patterns in the Distribution of Algal Symbionts		9	2001	9	2001	NA	spawner	gonochore
X101	Leptoseris mycetoseroides	ITS2	D1	43.8224	NA	Moorea	Eastern Indo-Pacific	Central Polynesia	Society Islands	5	5	5	-17.485	-149.834	Normal Conditions	Original Pub		FG6	Cloning of ITS2 & sequencing	Putnam 2012 ProcRSocB Endosymbiotic flexibility associates with environ sensitivity	<6-2012	NA	NA	NA	NA	NA	NA	NA
18752	Montipora capitata	ITS2	D1	43.8224	51	Kaneohe Bay	Eastern Indo-Pacific	Hawaii	Hawaii	1-2	1	2	21.6839	-157.783	Normal	Original Publication			Cloning of ITS2 & sequencing	Stat 2011 PLoS1 Variation in Zoox ITS2 seq among coral colonies	June 2007	6	2007	6	2007	Yes	spawner	hermaphrodite
14514	Montipora patula	ITS2	D1	43.8224	NA	Johnston Atoll, Hawaii	Eastern Indo-Pacific	Hawaii	Hawaii	2-4 m	2	4	18.078	-169.533	Normal Cond	GenBank	AF334660		Cloning of ITS2 & sequencing	Stat 2009 MEPS Specificity in communities of Symbiodinium in corals from Johnston Atoll	June '06	6	2006	6	2006	Yes	spawner	hermaphrodite
12588	Mycetophyllia ferox	ITS2	D1	43.8224	25m-Mfer-07	Curaçao	Tropical Atlantic	Tropical Northwestern Atlantic	Southern Caribbean	25	25	25	12.1252	-68.9742	Normal Conditions	Original publication			DGGE of ITS2 & sequencing	Bongaerts 2015 RoySocOpenSci Prevalent endosymbiont zoantion		11	2009	11	2009	Yes	brooder	hermaphrodite
19779	Orbicella annularis	ITS2	D1	43.8224	NA	Dos Mosquises, Venezuela	Tropical Atlantic	Tropical Northwestern Atlantic	Southern Caribbean		2	6	11.79	-66.89	Normal Cond	Original publication			DGGE of ITS2 & sequencing, RT-PCR of LSU	Kennedy 2015 CoralReefs Widespread prevalence of cryptic Symbiodinium D in O annularis	2007-08-01	8	2007	8	2007	No	spawner	hermaphrodite
17457	Pavona varians	ITS2	D1	43.8224	NA	Moorea	Eastern Indo-Pacific	Central Polynesia	Society Islands	2	2	2	-17.475	-149.837	Normal Conditions	Original Pub	HE579036	FR5	Cloning of ITS2 & sequencing	Putnam 2012 ProcRSocB Endosymbiotic flexibility associates with environ sensitivity	<6-2012	NA	NA	NA	NA	No	spawner	gonochore
15951	Pavona venosa	ITS2	D1	43.8224	NA	Tuléar	Western Indo-Pacific	Western Indian Ocean	Western and Northern Madagascar		1	30	-23.3	43.6	Normal conditions	Original publication		collected at SCUBA depths	DGGE of ITS2 & sequencing	Boonstra 2011 Diss Latitudinal Patterns in the Distribution of Algal Symbionts		11	2009	11	2009	No	spawner	gonochore
15088	Platygyra daedalea	ITS2	D1	43.8224	NA	Hengam Island, Iran	Western Indo-Pacific	Somali/Arabian	Arabian (Persian) Gulf	0.3	0.3	0.3	26.6816	55.8954	Normal Conditions	Direct from Publication		Site 1	DGGE of ITS2 & sequencing	Mashini 2015 JEMBE Comparison of Symbiodinium populations in corals from subtidal	2012-02-17	2	2012	2	2012	No	spawner	hermaphrodite
14239	Pocillopora capitata	ITS2	D1	43.8224	NA	La Paz, Mexico	Temperate Northern Pacific	Warm Temperate Northeast Pacific	Cortezian	1-6	1	6	24.3543	-110.285	Normal Cond	Original pub			DGGE of ITS2 & sequencing	LaJeunesse 2008 LimnoOceano Specificity and stability in high latitude eastern Pacific coral–algal symbioses		5	2004	5	2006	Yes	m	hermaphrodite
14247	Pocillopora damicornis	ITS2	D1	43.8224	NA	La Paz, Mexico	Temperate Northern Pacific	Warm Temperate Northeast Pacific	Cortezian	1-6	1	6	24.3543	-110.285	Normal Cond	Original pub			DGGE of ITS2 & sequencing	LaJeunesse 2008 LimnoOceano Specificity and stability in high latitude eastern Pacific coral–algal symbioses		5	2004	5	2006	Yes	brooder	hermaphrodite
14271	Pocillopora meandrina	ITS2	D1	43.8224	NA	La Paz, Mexico	Temperate Northern Pacific	Warm Temperate Northeast Pacific	Cortezian	1-6	1	6	24.3543	-110.285	Normal Cond	Original pub			DGGE of ITS2 & sequencing	LaJeunesse 2008 LimnoOceano Specificity and stability in high latitude eastern Pacific coral–algal symbioses		5	2004	5	2006	Yes	spawner	hermaphrodite
14187	Pocillopora verrucosa	ITS2	D1	43.8224	NA	La Paz, Mexico	Temperate Northern Pacific	Warm Temperate Northeast Pacific	Cortezian	1-6	1	6	24.3543	-110.285	Normal Cond	Original pub			DGGE of ITS2 & sequencing	LaJeunesse 2008 LimnoOceano Specificity and stability in high latitude eastern Pacific coral–algal symbioses		5	2004	5	2006	Yes	spawner	hermaphrodite
16552	Porites harrisoni	ITS2	D1	43.8224	NA	Fujairah	Western Indo-Pacific	Red Sea and Gulf of Aden	Southern Red Sea	2-7'	2	7	25.5	56.27	Unknown	Original pub			DGGE of ITS2 & sequencing	D’Angelo 2015 ISME Local adaptation constrains the distribution potential	Sept 2012 and March 2013	9	2012	3	2013	NA	NA	NA
16431	Porites lobata	ITS2	D1	43.8224	NA	Musandam	Western Indo-Pacific	Red Sea and Gulf of Aden	Southern Red Sea	2-7'	2	7	26.1	56.25	Unknown	Original pub			DGGE of ITS2 & sequencing	D’Angelo 2015 ISME Local adaptation constrains the distribution potential	Sept 2012 and March 2013	9	2012	3	2013	Yes	spawner	gonochore
16548	Porites lutea	ITS2	D1	43.8224	NA	Fujairah	Western Indo-Pacific	Red Sea and Gulf of Aden	Southern Red Sea	2-7'	2	7	25.5	56.27	Unknown	Original pub			DGGE of ITS2 & sequencing	D’Angelo 2015 ISME Local adaptation constrains the distribution potential	Sept 2012 and March 2013	9	2012	3	2013	Yes	spawner	gonochore
2756	Seriatopora hystrix	ITS2	D1	43.8224	NA	Changuu	Western Indo-Pacific	Western Indian Ocean	East African Coral Coast	2-6	2	6	-6.12007	39.1681	Normal Cond	Geosymbio	same_as_AF334660		DGGE of ITS2 & sequencing	LaJeunesse 2010 JBiogeograph Long-standing environmental conditions isolation and host–symbiont specificity	2007-04-01	4	2007	4	2007	Yes	brooder	hermaphrodite
15112	Siderastrea savignyana	ITS2	D1	43.8224	NA	Hengam Island, Iran	Western Indo-Pacific	Somali/Arabian	Arabian (Persian) Gulf	0.3	0.3	0.3	26.6816	55.8954	Normal Conditions	Direct from Publication		Site 1	DGGE of ITS2 & sequencing	Mashini 2015 JEMBE Comparison of Symbiodinium populations in corals from subtidal	2012-02-17	2	2012	2	2012	NA	NA	NA
12852	Siderastrea siderea	ITS2	D1	43.8224	02m-Ssid-01	Curaçao	Tropical Atlantic	Tropical Northwestern Atlantic	Southern Caribbean	2	2	2	12.1252	-68.9742	Normal Conditions	Original publication			DGGE of ITS2 & sequencing	Bongaerts 2015 RoySocOpenSci Prevalent endosymbiont zoantion		11	2009	11	2009	No	spawner	gonochore
X102	Stylophora madagascarensis	ITS2	D1	43.8224		Nosy Bé	Western Indo-Pacific	Western Indian Ocean	Western and Northern Madagascar		1	30	-13.4	48	Normal conditions	Original publication		collected at SCUBA depths	DGGE of ITS2 & sequencing	Boonstra 2011 Diss Latitudinal Patterns in the Distribution of Algal Symbionts		9	2001	9	2001	NA	NA	NA
15492	Stylophora pistillata	ITS2	D1	43.8224	NA	Fort Dauphin	Western Indo-Pacific	Western Indian Ocean	Southeast Madagascar		1	30	-25	46.9	Normal conditions	Original publication		collected at SCUBA depths	DGGE of ITS2 & sequencing	Boonstra 2011 Diss Latitudinal Patterns in the Distribution of Algal Symbionts		9	2001	9	2001	Yes	brooder	hermaphrodite
X103	Stylophora subseriata	ITS2	D1	43.8224	NA	Vohemar	Western Indo-Pacific	Western Indian Ocean	Western and Northern Madagascar		1	30	-13.4	50	Normal conditions	Original publication		collected at SCUBA depths	DGGE of ITS2 & sequencing	Boonstra 2011 Diss Latitudinal Patterns in the Distribution of Algal Symbionts		9	2001	9	2001	Yes	brooder	hermaphrodite
2862	Montastraea cavernosa	ITS2	C3-o	44.2671	NA	Barbados, Caribbean	Tropical Atlantic	Tropical Northwestern Atlantic	Eastern Caribbean		15	15	13.192	-59.641	Normal Cond	Geosymbio	N_A		DGGE of ITS2 & sequencing	LaJeunesse 2009 ProcRSocB Outbreak and persistence of opportunistic Zoox during 2005 Caribbean bleaching		7	2005	8	2005	No	spawner	gonochore
5087	Favia fragum	ITS2	A4	45.9496	5	St. Croix, Virgin Islands	Tropical Atlantic	Tropical Northwestern Atlantic	Eastern Caribbean	3-30m	3	30			Normal Cond	GenBank	AY074984		Phylotypes identified by restriction analysis of ; SSU rDNA, 5' LSU rDNA, and ITS1/5.8S/ITS2; PCR products were cloned and sequenced, and concensus sequences were used from 3 clones	Savage 2002 MEPS Molecular diversity of symbiotic algae at the latitudinal margins of their distribution						Yes	brooder	hermaphrodite
7602	Porites astreoides	ITS2	A4	45.9496	NA	Carrie Bow Cay, Belize	Tropical Atlantic	Tropical Northwestern Atlantic	Western Caribbean	8	8	8	16.803	-88.0816	Normal Conditions	Aquarist			DGGE of ITS2 & sequencing	Warner 2006 LimnolOceanograph The ecological distribution and comparative photobiology of symbiotic dinoflagellates from reef corals in Belize	2002-03	NA	2002	NA	2003	Yes	brooder	Mixed
X104	Porites divaricata	ITS2	A4	45.9496	NA	Puerto Morelos	Tropical Atlantic	Tropical Northwestern Atlantic	Southern Gulf of Mexico	3-6	3	6	21	-87	Normal Cond	Original pub			DGGE of ITS2 & sequencing	Aschaffenburg 2012 Diss Phsyiological response of Symbiodinium spp		6	2009	6	2009	Yes	brooder	gonochore
8897	Porites furcata	ITS2	A4	45.9496	1	Puerto Morelos, Yucatan, Mexico	Tropical Atlantic	Tropical Northwestern Atlantic	Southern Gulf of Mexico	1.5	1.5	1.5	21	-87	Normal Cond	Riddle 2011	NA		DGGE of ITS2 & sequencing	LaJeunesse 2002 MarBiol Diversity and community structure of symbiotic dinoflagellates	Aug 1998, Sep 1999	8	1998	9	1999	NA	brooder	gonochore
X37	Porites porites	ITS2	A4	45.9496	NA	Barbados	Tropical Atlantic	Tropical Northwestern Atlantic	Eastern Caribbean	1-5	1	5	13.07	-60	Normal Cond	Original pub	same_as_GU907637		DGGE of ITS2 & sequencing	Finney 2010 MicrobEcol The Relative Significance of Host–Habitat	Jul 02 -Aug 03	7	2002	8	2003	Yes	brooder	gonochore
13858	Porites compressa	ITS2	C15.21	53.1205	165	Kaneohe Bay	Eastern Indo-Pacific	Hawaii	Hawaii	1-8	1	8	21.26.992	-157.478	Normal Conditions	Original publication		36 High TSA	Cloning of ITS2 & sequencing	Stat 2013 Ecol&Evol Distribution of the thermally tolerant symbiont lineage Symbiodinium in corals from Hawaii	2007-06-01	6	2007	6	2007	Yes	spawner	gonochore
13776	Porites compressa	ITS2	C15.23	53.1205	134	Kaneohe Bay	Eastern Indo-Pacific	Hawaii	Hawaii	1-8	1	8	21.25.271	-157.47.255	Normal Conditions	Original publication		36 High TSA	Cloning of ITS2 & sequencing	Stat 2013 Ecol&Evol Distribution of the thermally tolerant symbiont lineage Symbiodinium in corals from Hawaii	2007-06-01	6	2007	6	2007	Yes	spawner	gonochore
13872	Porites lobata	ITS2	C15.23	53.1205	174	French Frigate Shoals	Eastern Indo-Pacific	Hawaii	Hawaii	1-8	1	8	23.50.142	-166.15.954	Normal Conditions	Original publication		9 Low TSA	Cloning of ITS2 & sequencing	Stat 2013 Ecol&Evol Distribution of the thermally tolerant symbiont lineage Symbiodinium in corals from Hawaii	2007-08-01	8	2007	8	2007	Yes	spawner	gonochore
13762	Porites compressa	ITS2	C15.25	53.1205	129	Kaneohe Bay	Eastern Indo-Pacific	Hawaii	Hawaii	1-8	1	8	21.25.271	-157.47.255	Normal Conditions	Original publication		36 High TSA	Cloning of ITS2 & sequencing	Stat 2013 Ecol&Evol Distribution of the thermally tolerant symbiont lineage Symbiodinium in corals from Hawaii	2007-06-01	6	2007	6	2007	Yes	spawner	gonochore
16652	Porites lobata	ITS2	C15.25	53.1205	NA	Nihoa	Eastern Indo-Pacific	Hawaii	Hawaii	10-20'	10	20	23.2531	-162.123	Normal Conditions	Original pub			Cloning of ITS2 & sequencing	Stat 2015 CoralReefs Geographic structure and host specificity	2005-2009	NA	2005	NA	2009	Yes	spawner	gonochore
9623	Acanthastrea echinata	ITS2	D1-4	53.1205	NA	Feather Reef GBR	Central Indo-Pacific	Northeast Australian Shelf	Central and Southern Great Barrier Reef	1-8	1	8	-18	146	Normal Cond	SymbioGBR			DGGE of ITS2 & sequencing	LaJeunesse 2004 MEPS Closely related Symbiodinium spp differ in relative dominance	May (2003)	5	2003	5	2003	No	spawner	hermaphrodite
2436	Acropora aspera	ITS2	D1-4	53.1205	NA	Cape Panwa	Western Indo-Pacific	Andaman	Andaman Sea Coral Coast	0-5	0	5	7.8073	98.4092	Normal Cond	Geosymbio	same_as_AF499802		DGGE of ITS2 & sequencing	LaJeunesse 2010 JBiogeograph Long-standing environmental conditions isolation and host–symbiont specificity	2007-02-01	2	2007	2	2007	No	spawner	hermaphrodite
1512	Acropora cervicornis	ITS2	D1-4	53.1205	NA	Belize	Tropical Atlantic	Tropical Northwestern Atlantic	Western Caribbean	>10	10	30	17	-88	Normal Cond	Original pub	same_as_AF499802		DGGE of ITS2 & sequencing	Finney 2010 MicrobEcol The Relative Significance of Host–Habitat	Jul 02 -Aug 03	7	2002	8	2003	No	spawner	hermaphrodite
17215	Acropora cytherea	ITS2	D1-4	53.1205	NA	Moorea	Eastern Indo-Pacific	Central Polynesia	Society Islands	2	2	2	-17.485	-149.834	Normal Conditions	Original Pub	HE579042	FG1	Cloning of ITS2 & sequencing	Putnam 2012 ProcRSocB Endosymbiotic flexibility associates with environ sensitivity	<6-2012	NA	NA	NA	NA	No	spawner	hermaphrodite
17223	Acropora digitifera	ITS2	D1-4	53.1205	NA	Moorea	Eastern Indo-Pacific	Central Polynesia	Society Islands	20	20	20	-17.5475	-149.769	Normal Conditions	Original Pub	HE579042	FR4	Cloning of ITS2 & sequencing	Putnam 2012 ProcRSocB Endosymbiotic flexibility associates with environ sensitivity	<6-2012	NA	NA	NA	NA	No	spawner	hermaphrodite
16045	Acropora humilis	ITS2	D1-4	53.1205	NA	Vohemar	Western Indo-Pacific	Western Indian Ocean	Western and Northern Madagascar		1	30	-13.4	50	Normal conditions	Original publication		collected at SCUBA depths	DGGE of ITS2 & sequencing	Boonstra 2011 Diss Latitudinal Patterns in the Distribution of Algal Symbionts		9	2001	9	2001	No	spawner	hermaphrodite
X105	Acropora hemprichi	ITS2	D1-4	53.1205	NA	Mafia	Western Indo-Pacific	Western Indian Ocean	East African Coral Coast		1	7	-8	39.7	Normal Cond	Direct from publication			DGGE of ITS2 & sequencing	Chauka 2012 WIndOceaJMarSci Diversity of Symbiodinium in Tanzania		8	2008	8	2008	No	spawner	hermaphrodite
3310	Acropora hyacinthus	ITS2	D1-4	53.1205	NA	Ofu Island, American Samoa	Eastern Indo-Pacific	Central Polynesia	Samoa Islands	1-3	1	3	-14.177	-169.652	Normal Cond	Aquarist	HQ631386	Stated as = to D1-4 in text	Direct sequencing of ITS1	Oliver 2011 CoralReefs Many corals host thermally resistant symbionts in high-temperature habit		3	2007	3	2007	No	spawner	hermaphrodite
14072	Acropora latistella	ITS2	D1-4	53.1205	NA	Dampier	Centra Indo-Pacific	Northwest Australian Shelf	Exmouth to Broome	<7	0	7	-20.6595	116.708	Moderate bleaching				DGGE of ITS2 & sequencing	Silverstein 2011 MEPS Novel algal symbiont diversity in reef corals of Western Australia	2005-06-01	6	2005	6	2005	No	spawner	hermaphrodite
15127	Acropora microclados	ITS2	D1-4	53.1205	NA	Luhuitou Bay	Central Indo-Pacific	South China Sea	Gulf of Tonkin	1-10 m	1	10	18.2217	109.495	Normal conditions	Original pub			DGGE of ITS2 & sequencing	Zhou 2011 JSysEvol Low genetic diversity of symbiotic dinoflagellates	Oct '08	10	2008	10	2008	No	spawner	hermaphrodite
14950	Acropora muricata	ITS2	D1-4	53.1205	NA	Mbudya	Western Indo-Pacific	Western Indian Ocean	East African Coral Coast	4-7	4	7	-6.65938	39.2479	Normal Cond	Original publication			DGGE of ITS2 & sequencing	Chauka 2016 AfrJMarSci Influence of local environmental conditions and bleaching histories		8	2009	8	2009	NA	spawner	hermaphrodite
8977	Acropora subulata	ITS2	D1-4	53.1205	NA	Ko Phi Phi Leh	Western Indo-Pacific	Andaman	Andaman Sea Coral Coast	6-12	6	12	7.7333	98.7667	Normal Cond	Geosymbio			DGGE of ITS2 & sequencing	LaJeunesse 2010 JBiogeograph Long-standing environmental conditions isolation and host–symbiont specificity	2007-02-01	2	2007	2	2007	No	spawner	hermaphrodite
8992	Acropora valida	ITS2	D1-4	53.1205	NA	Ko Phi Phi Leh	Western Indo-Pacific	Andaman	Andaman Sea Coral Coast	6-12	6	12	7.7333	98.7667	Normal Cond	Geosymbio			DGGE of ITS2 & sequencing	LaJeunesse 2010 JBiogeograph Long-standing environmental conditions isolation and host–symbiont specificity	2007-02-01	2	2007	2	2007	No	spawner	hermaphrodite
8860	Agaricia humilis	ITS2	D1-4	53.1205	1	Puerto Morelos, Yucatan, Mexico	Tropical Atlantic	Tropical Northwestern Atlantic	Southern Gulf of Mexico	2.5	2.5	2.5	21	-87	Normal Cond	Riddle 2011	NA		DGGE of ITS2 & sequencing	LaJeunesse 2002 MarBiol Diversity and community structure of symbiotic dinoflagellates	Aug 1998, Sep 1999	8	1998	9	1999	yes	brooder	gonochore
9681	Astrea curta	ITS2	D1-4	53.1205	NA	Feather Reef GBR	Central Indo-Pacific	Northeast Australian Shelf	Central and Southern Great Barrier Reef	1–8	1	8	-18	146	Normal Cond	Riddle 2011			DGGE of ITS2 & sequencing	LaJeunesse 2004 MEPS Closely related Symbiodinium spp differ in relative dominance	May (2003)	5	2003	5	2003	No	spawner	hermaphrodite
9220	Astreopora myriophthalma	ITS2	D1-4	53.1205	NA	Ko Phi Phi Leh	Western Indo-Pacific	Andaman	Andaman Sea Coral Coast	6-12	6	12	7.7333	98.7667	Normal Cond	Geosymbio			DGGE of ITS2 & sequencing	LaJeunesse 2010 JBiogeograph Long-standing environmental conditions isolation and host–symbiont specificity	2007-02-01	2	2007	2	2007	No	spawner	hermaphrodite
2558	Coelastrea aspera	ITS2	D1-4	53.1205	NA	Cape Panwa	Western Indo-Pacific	Andaman	Andaman Sea Coral Coast	0-5	0	5	7.8073	98.4092	Normal Cond	Geosymbio	same_as_AF499802		DGGE of ITS2 & sequencing	LaJeunesse 2010 JBiogeograph Long-standing environmental conditions isolation and host–symbiont specificity	2007-02-01	2	2007	2	2007	No	spawner	hermaphrodite
2479	Coeloseris mayeri	ITS2	D1-4	53.1205	NA	Cape Panwa	Western Indo-Pacific	Andaman	Andaman Sea Coral Coast	0-5	0	5	7.8073	98.4092	Normal Cond	Geosymbio	same_as_AM748597		DGGE of ITS2 & sequencing	LaJeunesse 2010 JBiogeograph Long-standing environmental conditions isolation and host–symbiont specificity	2007-02-01	2	2007	2	2007	No	brooder	gonochore
9271	Colpophyllia natans	ITS2	D1-4	53.1205	NA	Barbados	Tropical Atlantic	Tropical Northwestern Atlantic	Eastern Caribbean	>10	10	30	13.07	-60	Normal Cond	Original pub			DGGE of ITS2 & sequencing	Finney 2010 MicrobEcol The Relative Significance of Host–Habitat	Jul 02 -Aug 03	7	2002	8	2003	No	spawner	hermaphrodite
9223	Ctenactis echinata	ITS2	D1-4	53.1205	NA	Cape Panwa	Western Indo-Pacific	Andaman	Andaman Sea Coral Coast	0-5	0	5	7.8073	98.4092	Normal Cond	Geosymbio	same_as_AM748597		DGGE of ITS2 & sequencing	LaJeunesse 2010 JBiogeograph Long-standing environmental conditions isolation and host–symbiont specificity	2007-02-01	2	2007	2	2007	No	spawner	gonochore
16060	Cyphastrea microphthalma	ITS2	D1-4	53.1205	NA	Vohemar	Western Indo-Pacific	Western Indian Ocean	Western and Northern Madagascar		1	30	-13.4	50	Normal conditions	Original publication		collected at SCUBA depths	DGGE of ITS2 & sequencing	Boonstra 2011 Diss Latitudinal Patterns in the Distribution of Algal Symbionts		9	2001	9	2001	No	spawner	hermaphrodite
15800	Cyphastrea serailia	ITS2	D1-4	53.1205	NA	Tuléar	Western Indo-Pacific	Western Indian Ocean	Western and Northern Madagascar		1	30	-23.3	43.6	Normal conditions	Original publication		collected at SCUBA depths	DGGE of ITS2 & sequencing	Boonstra 2011 Diss Latitudinal Patterns in the Distribution of Algal Symbionts		9	2001	9	2001	No	spawner	hermaphrodite
15509	Diploastrea heliopora	ITS2	D1-4	53.1205	NA	Nosy Bé	Western Indo-Pacific	Western Indian Ocean	Western and Northern Madagascar		1	30	-13.4	48	Normal conditions	Original publication		collected at SCUBA depths	DGGE of ITS2 & sequencing	Boonstra 2011 Diss Latitudinal Patterns in the Distribution of Algal Symbionts		9	2001	9	2001	No	spawner	gonochore
1583	Diploria clivosa	ITS2	D1-4	53.1205	NA	Barbados	Tropical Atlantic	Tropical Northwestern Atlantic	Eastern Caribbean	1-5	1	5	13.07	-60	Normal Cond	Original pub	same_as_AF499802		DGGE of ITS2 & sequencing	Finney 2010 MicrobEcol The Relative Significance of Host–Habitat	Jul 02 -Aug 03	7	2002	8	2003	No	spawner	hermaphrodite
9290	Diploria labyrinthiformis	ITS2	D1-4	53.1205	NA	Barbados	Tropical Atlantic	Tropical Northwestern Atlantic	Eastern Caribbean	6-10	6	10	13.07	-60	Normal Cond	Original pub			DGGE of ITS2 & sequencing	Finney 2010 MicrobEcol The Relative Significance of Host–Habitat	Jul 02 -Aug 03	7	2002	8	2003	No	spawner	hermaphrodite
15960	Dipsastraea matthaii	ITS2	D1-4	53.1205	NA	Tuléar	Western Indo-Pacific	Western Indian Ocean	Western and Northern Madagascar		1	30	-23.3	43.6	Normal conditions	Original publication		collected at SCUBA depths	DGGE of ITS2 & sequencing	Boonstra 2011 Diss Latitudinal Patterns in the Distribution of Algal Symbionts		11	2009	11	2009	NA	spawner	hermaphrodite
15543	Echinophyllia aspera	ITS2	D1-4	53.1205	NA	Nosy Bé	Western Indo-Pacific	Western Indian Ocean	Western and Northern Madagascar		1	30	-13.4	48	Normal conditions	Original publication		collected at SCUBA depths	DGGE of ITS2 & sequencing	Boonstra 2011 Diss Latitudinal Patterns in the Distribution of Algal Symbionts		9	2001	9	2001	No	spawner	hermaphrodite
2507	Echinopora gemmacea	ITS2	D1-4	53.1205	NA	Ko Phi Phi Don	Western Indo-Pacific	Andaman	Andaman Sea Coral Coast	2-6	2	6	7.7333	98.7667	Normal Cond	Geosymbio	same_as_AF499802		DGGE of ITS2 & sequencing	LaJeunesse 2010 JBiogeograph Long-standing environmental conditions isolation and host–symbiont specificity	2007-02-01	2	2007	2	2007	No	spawner	hermaphrodite
2523	Favites abdita	ITS2	D1-4	53.1205	NA	Cape Panwa	Western Indo-Pacific	Andaman	Andaman Sea Coral Coast	0-5	0	5	7.8073	98.4092	Normal Cond	Geosymbio	same_as_AF499802		DGGE of ITS2 & sequencing	LaJeunesse 2010 JBiogeograph Long-standing environmental conditions isolation and host–symbiont specificity	2007-02-01	2	2007	2	2007	No	spawner	hermaphrodite
9022	Favites pentagona	ITS2	D1-4	53.1205	NA	Ko Phi Phi Leh	Western Indo-Pacific	Andaman	Andaman Sea Coral Coast	6-12	6	12	7.7333	98.7667	Normal Cond	Geosymbio			DGGE of ITS2 & sequencing	LaJeunesse 2010 JBiogeograph Long-standing environmental conditions isolation and host–symbiont specificity	2007-02-01	2	2007	2	2007	No	spawner	hermaphrodite
9029	Favites valenciennesi	ITS2	D1-4	53.1205	NA	Similan Islands	Western Indo-Pacific	Andaman	Andaman Sea Coral Coast	2-12	2	12	8.6525	97.6408	Normal Cond	Geosymbio			DGGE of ITS2 & sequencing	LaJeunesse 2010 JBiogeograph Long-standing environmental conditions isolation and host–symbiont specificity	2007-02-01	2	2007	2	2007	no	spawner	hermaphrodite
2543	Fungia fungites	ITS2	D1-4	53.1205	NA	Cape Panwa	Western Indo-Pacific	Andaman	Andaman Sea Coral Coast	0-5	0	5	7.8073	98.4092	Normal Cond	Geosymbio	same_as_AF499802		DGGE of ITS2 & sequencing	LaJeunesse 2010 JBiogeograph Long-standing environmental conditions isolation and host–symbiont specificity	2007-02-01	2	2007	2	2007	No	spawner	gonochore
9035	Galaxea astreata	ITS2	D1-4	53.1205	NA	Ko Phi Phi Don	Western Indo-Pacific	Andaman	Andaman Sea Coral Coast	2-6	2	6	7.7333	98.7667	Normal Cond	Geosymbio			DGGE of ITS2 & sequencing	LaJeunesse 2010 JBiogeograph Long-standing environmental conditions isolation and host–symbiont specificity	2007-02-01	2	2007	2	2007	No	spawner	Mixed
15685	Galaxea fascicularis	ITS2	D1-4	53.1205	NA	Nosy Bé	Western Indo-Pacific	Western Indian Ocean	Western and Northern Madagascar		1	30	-13.4	48	Normal conditions	Original publication		collected at SCUBA depths	DGGE of ITS2 & sequencing	Boonstra 2011 Diss Latitudinal Patterns in the Distribution of Algal Symbionts		3	2007	3	2007	No	spawner	gonochore
9711	Galaxea horresens	ITS2	D1-4	53.1205	NA	Rib Reef GBR	Central Indo-Pacific	Northeast Australian Shelf	Central and Southern Great Barrier Reef	1-8'	1	8	-18	147	Normal Cond	Riddle 2011			DGGE of ITS2 & sequencing	LaJeunesse 2004 MEPS Closely related Symbiodinium spp differ in relative dominance	May (2003)	5	2003	5	2003	Yes	brooder	hermaphrodite
9041	Gardineroseris planulata	ITS2	D1-4	53.1205	NA	Similan Islands	Western Indo-Pacific	Andaman	Andaman Sea Coral Coast	2-12	2	12	8.6525	97.6408	Normal Cond	Geosymbio			DGGE of ITS2 & sequencing	LaJeunesse 2010 JBiogeograph Long-standing environmental conditions isolation and host–symbiont specificity	2007-02-01	2	2007	2	2007	no	spawner	gonochore
14073	Goniastrea australensis	ITS2	D1-4	53.1205	NA	Dampier	Centra Indo-Pacific	Northwest Australian Shelf	Exmouth to Broome	<7	0	7	-20.6595	116.708	Moderate bleaching		same_as_AF499802		DGGE of ITS2 & sequencing	Silverstein 2011 MEPS Novel algal symbiont diversity in reef corals of Western Australia	2005-06-01	6	2005	6	2005	No	spawner	hermaphrodite
8828	Goniastrea favulus	ITS2	D1-4	53.1205	NA	Heron Island	Central Indo-Pacific	Northeast Australian Shelf	Central and Southern GBR	1	1	1	-23	152	Normal Cond	Original pub			DGGE of ITS2 & sequencing	LaJeunesse 2003 LimnolOceanogr Low symbiont diversity in southern Great Barrier Reef	Feb and March 2002	2	2002	3	2002	No	spawner	hermaphrodite
9047	Goniastrea pectinata	ITS2	D1-4	53.1205	NA	Cape Panwa	Western Indo-Pacific	Andaman	Andaman Sea Coral Coast	0-5	0	5	7.8073	98.4092	Normal Cond	Geosymbio			DGGE of ITS2 & sequencing	LaJeunesse 2010 JBiogeograph Long-standing environmental conditions isolation and host–symbiont specificity	2007-02-01	2	2007	2	2007	No	spawner	hermaphrodite
2584	Goniastrea retiformis	ITS2	D1-4	53.1205	NA	Racha	Western Indo-Pacific	Andaman	Andaman Sea Coral Coast	2-5	2	5	7.6101	98.3706	Normal Cond	Geosymbio	same_as_AF499802		DGGE of ITS2 & sequencing	LaJeunesse 2010 JBiogeograph Long-standing environmental conditions isolation and host–symbiont specificity	2007-02-01	2	2007	2	2007	No	spawner	hermaphrodite
15888	Goniastrea stelligera	ITS2	D1-4	53.1205	NA	Tuléar	Western Indo-Pacific	Western Indian Ocean	Western and Northern Madagascar		1	30	-23.3	43.6	Normal conditions	Original publication		collected at SCUBA depths	DGGE of ITS2 & sequencing	Boonstra 2011 Diss Latitudinal Patterns in the Distribution of Algal Symbionts		3	2007	3	2007	NA	spawner	hermaphrodite
9056	Goniopora columna	ITS2	D1-4	53.1205	NA	Ko Phi Phi Don	Western Indo-Pacific	Andaman	Andaman Sea Coral Coast	2-6	2	6	7.7333	98.7667	Normal Cond	Geosymbio			DGGE of ITS2 & sequencing	LaJeunesse 2010 JBiogeograph Long-standing environmental conditions isolation and host–symbiont specificity	2007-02-01	2	2007	2	2007	No	spawner	gonochore
9234	Goniopora djiboutiensis	ITS2	D1-4	53.1205	NA	Koh Hae	Western Indo-Pacific	Andaman	Andaman Sea Coral Coast	2-6	2	6	7.7456	98.3763	Normal Cond	Geosymbio			DGGE of ITS2 & sequencing	LaJeunesse 2010 JBiogeograph Long-standing environmental conditions isolation and host–symbiont specificity	2007-02-01	2	2007	2	2007	No	spawner	gonochore
16004	Goniopora stokesi	ITS2	D1-4	53.1205	NA	Tuléar	Western Indo-Pacific	Western Indian Ocean	Western and Northern Madagascar		1	30	-23.3	43.6	Normal conditions	Original publication		collected at SCUBA depths	DGGE of ITS2 & sequencing	Boonstra 2011 Diss Latitudinal Patterns in the Distribution of Algal Symbionts		11	2009	11	2009	No	spawner	gonochore
X106	Gyrosmilia interrupta	ITS2	D1-4	53.1205	NA	Fort Dauphin	Western Indo-Pacific	Western Indian Ocean	Southeast Madagascar		1	30	-25	46.9	Normal conditions	Original publication		collected at SCUBA depths	DGGE of ITS2 & sequencing	Boonstra 2011 Diss Latitudinal Patterns in the Distribution of Algal Symbionts		9	2001	9	2001	No	spawner	gonochore
9065	Herpolitha limax	ITS2	D1-4	53.1205	NA	Cape Panwa	Western Indo-Pacific	Andaman	Andaman Sea Coral Coast	0-5	0	5	7.8073	98.4092	Normal Cond	Geosymbio			DGGE of ITS2 & sequencing	LaJeunesse 2010 JBiogeograph Long-standing environmental conditions isolation and host–symbiont specificity	2007-02-01	2	2007	2	2007	no	spawner	gonochore
15534	Hydnophora exesa	ITS2	D1-4	53.1205	NA	Nosy Bé	Western Indo-Pacific	Western Indian Ocean	Western and Northern Madagascar		1	30	-13.4	48	Normal conditions	Original publication		collected at SCUBA depths	DGGE of ITS2 & sequencing	Boonstra 2011 Diss Latitudinal Patterns in the Distribution of Algal Symbionts		9	2001	9	2001	No	spawner	hermaphrodite
8831	Hydnophora microconos	ITS2	D1-4	53.1205	NA	Heron Island	Central Indo-Pacific	Northeast Australian Shelf	Central and Southern GBR	3	3	3	-23	152	Normal Cond	Original pub			DGGE of ITS2 & sequencing	LaJeunesse 2003 LimnolOceanogr Low symbiont diversity in southern Great Barrier Reef	Feb and March 2002	2	2002	3	2002	No	spawner	hermaphrodite
16038	Isopora cuneata	ITS2	D1-4	53.1205	NA	Vohemar	Western Indo-Pacific	Western Indian Ocean	Western and Northern Madagascar		1	30	-13.4	50	Normal conditions	Original publication		collected at SCUBA depths	DGGE of ITS2 & sequencing	Boonstra 2011 Diss Latitudinal Patterns in the Distribution of Algal Symbionts		9	2001	9	2001	NA	brooder	hermaphrodite
18271	Isopora palifera	ITS2	D1-4	53.1205	NA	Tantzei Bay	Central Indo-Pacific	South Kuroshio	South Kuroshio	< 3m	0	3	21.9426	120.784	Normal Cond	Original Publication			DGGE of ITS2 & sequencing	Hsu 2012 ZoolStud Temporal and Spatial Variations in Symbiont Communities	1905-07-01	NA	2009	NA	2009	No	brooder	hermaphrodite
9076	Leptastrea pruinosa	ITS2	D1-4	53.1205	NA	Cape Panwa	Western Indo-Pacific	Andaman	Andaman Sea Coral Coast	0-5	0	5	7.8073	98.4092	Normal Cond	Geosymbio			DGGE of ITS2 & sequencing	LaJeunesse 2010 JBiogeograph Long-standing environmental conditions isolation and host–symbiont specificity	2007-02-01	2	2007	2	2007	No	spawner	gonochore
17381	Leptastrea purpurea	ITS2	D1-4	53.1205	NA	Moorea	Eastern Indo-Pacific	Central Polynesia	Society Islands	7	7	7	-17.513	-149.767	Normal Conditions	Original Pub	HE579042	FG3	Cloning of ITS2 & sequencing	Putnam 2012 ProcRSocB Endosymbiotic flexibility associates with environ sensitivity	<6-2012	NA	NA	NA	NA	No	spawner	gonochore
3015	Leptoria phrygia	ITS2	D1-4	53.1205	NA	Feather Reef GBR	Central Indo-Pacific	Northeast Australian Shelf	Central and Southern Great Barrier Reef	1-8'	1	8	-18	146	Normal Cond	Aquarist			DGGE of ITS2 & sequencing	LaJeunesse 2004 MEPS Closely related Symbiodinium spp differ in relative dominance	May (2003)	5	2003	5	2003	No	spawner	hermaphrodite
X107	Leptoseris explanata	ITS2	D1-4	53.1205	NA	Al Fahal Reef	Western Indo-Pacific	Red Sea and Gulf of Aden	Northern and Central Red Sea	30	30	30	22.3	38.96	Normal	Original Publication			DGGE of ITS2 & sequencing	Ziegler 2015 FrontMarSci Mesophotic coral depth acclimatization is a function	2016-09-12	9	2012	9	2012	No	spawner	gonochore
X108	Leptoseris mycetoseroides	ITS2	D1-4	53.1205	NA	Moorea	Eastern Indo-Pacific	Central Polynesia	Society Islands	5	5	5	-17.485	-149.834	Normal Conditions	Original Pub		FG6	Cloning of ITS2 & sequencing	Putnam 2012 ProcRSocB Endosymbiotic flexibility associates with environ sensitivity	<6-2012	NA	NA	NA	NA	NA	NA	NA
17930	Leptoseris yabei	ITS2	D1-4	53.1205	NA	Al Fahal Reef	Western Indo-Pacific	Red Sea and Gulf of Aden	Northern and Central Red Sea	10	10	10	22.3	38.96	Normal	Original Publication			DGGE of ITS2 & sequencing	Ziegler 2015 FrontMarSci Mesophotic coral depth acclimatization is a function	2016-09-12	9	2012	9	2012	No	spawner	gonochore
2613	Lobophyllia hemprichii	ITS2	D1-4	53.1205	NA	Ko Phi Phi Leh	Western Indo-Pacific	Andaman	Andaman Sea Coral Coast	6-12	6	12	7.7333	98.7667	Normal Cond	Geosymbio	same_as_AF499802		DGGE of ITS2 & sequencing	LaJeunesse 2010 JBiogeograph Long-standing environmental conditions isolation and host–symbiont specificity	2007-02-01	2	2007	2	2007	No	spawner	hermaphrodite
9085	Merulina ampliata	ITS2	D1-4	53.1205	NA	Cape Panwa	Western Indo-Pacific	Andaman	Andaman Sea Coral Coast	0-5	0	5	7.8073	98.4092	Normal Cond	Geosymbio			DGGE of ITS2 & sequencing	LaJeunesse 2010 JBiogeograph Long-standing environmental conditions isolation and host–symbiont specificity	2007-02-01	2	2007	2	2007	No	spawner	hermaphrodite
18131	Montipora aequituberculata	ITS2	D1-4	53.1205	NA	Kenting National Park, Taiwan	Central Indo-Pacific	South Kuroshio	South Kuroshio	< 5m	0	5	21.9317	120.746	Exposed to warm water outflow from nuclear power plant	Original Publication			DGGE of ITS2 & sequencing	Wang 2011 MEPS Photosystem II breakdown induced by reactiveoxygen species in freshly-isolated Symbiodiniumfrom Montipora(Scleractinia; Acroporidae)	Between October 2008 and June 2009	10	2008	6	2009	Yes	spawner	hermaphrodite
16635	Montipora capitata	ITS2	D1-4	53.1205	NA	Nihoa	Eastern Indo-Pacific	Hawaii	Hawaii	10-20'	10	20	23.2531	-162.123	Normal Conditions	Original pub			Cloning of ITS2 & sequencing	Stat 2015 CoralReefs Geographic structure and host specificity	2005-2009	NA	2005	NA	2009	Yes	spawner	hermaphrodite
X109	Montipora efflorescens	ITS2	D1-4	53.1205	NA	Kenting National Park, Taiwan	Central Indo-Pacific	South Kuroshio	South Kuroshio	< 5m	0	5	21.9317	120.746	Exposed to warm water outflow from nuclear power plant	Original Publication			DGGE of ITS2 & sequencing	Wang 2011 MEPS Photosystem II breakdown induced by reactiveoxygen species in freshly-isolated Symbiodiniumfrom Montipora(Scleractinia; Acroporidae)	Between October 2008 and June 2009	10	2008	6	2009	Yes	spawner	hermaphrodite
15141	Montipora grisea	ITS2	D1-4	53.1205	NA	Ximao Island (Xidao on Google Maps)	Central Indo-Pacific	South China Sea	Gulf of Tonkin	1-10 m	1	10	18.2353	109.374	Normal conditions	Original pub			DGGE of ITS2 & sequencing	Zhou 2011 JSysEvol Low genetic diversity of symbiotic dinoflagellates	Oct '08	10	2008	10	2008	Yes	spawner	hermaphrodite
9609	Montipora patula	ITS2	D1-4	53.1205	NA	Oahu	Eastern Indo-Pacific	Hawaii	Hawaii	3-15	3	15	21.4667	-157.983	Normal Cond	Aquarist		Article does not say where each sample was from, but all sites (Kaneohe Bay, Haleiwa Trench, and Wailua Bay) are off the island of Oahu	DGGE of ITS2 & sequencing	LaJeunesse 2004 CoralReefs High diversity and host specificity observed among symbiotic	<10-2003	NA	NA	NA	NA	Yes	spawner	hermaphrodite
X110	Montipora stellata	ITS2	D1-4	53.1205	NA	Kenting National Park, Taiwan	Central Indo-Pacific	South Kuroshio	South Kuroshio	< 5m	0	5	21.9317	120.746	Exposed to warm water outflow from nuclear power plant	Original Publication			DGGE of ITS2 & sequencing	Wang 2011 MEPS Photosystem II breakdown induced by reactiveoxygen species in freshly-isolated Symbiodiniumfrom Montipora(Scleractinia; Acroporidae)	Between October 2008 and June 2009	10	2008	6	2009	Yes	spawner	hermaphrodite
2627	Mycedium elephantotus	ITS2	D1-4	53.1205	NA	Bawe	Western Indo-Pacific	Western Indian Ocean	East African Coral Coast	2-6	2	6	-6.15054	39.1315	Normal Cond	Geosymbio	same_as_AF499802		DGGE of ITS2 & sequencing	LaJeunesse 2010 JBiogeograph Long-standing environmental conditions isolation and host–symbiont specificity	2007-04-01	4	2007	4	2007	No	spawner	hermaphrodite
12589	Mycetophyllia ferox	ITS2	D1-4	53.1205	25m-Mfer-07	Curaçao	Tropical Atlantic	Tropical Northwestern Atlantic	Southern Caribbean	25	25	25	12.1252	-68.9742	Normal Conditions	Original publication			DGGE of ITS2 & sequencing	Bongaerts 2015 RoySocOpenSci Prevalent endosymbiont zoantion		11	2009	11	2009	Yes	brooder	hermaphrodite
2811	Orbicella annularis	ITS2	D1-4	53.1205	NA	Barbados, Caribbean	Tropical Atlantic	Tropical Northwestern Atlantic	Eastern Caribbean		15	15	13.192	-59.641	Normal Cond	Geosymbio			DGGE of ITS2 & sequencing	LaJeunesse 2009 ProcRSocB Outbreak and persistence of opportunistic Zoox during 2005 Caribbean bleaching		7	2005	8	2005	No	spawner	hermaphrodite
2949	Orbicella faveolata	ITS2	D1-4	53.1205	NA	Puerto Morelos, Yucatan, Mexico	Tropical Atlantic	Tropical Northwestern Atlantic	Southern Gulf of Mexico	15	15	15	21	-87	Normal Cond	Aquarist			DGGE of ITS2 & sequencing	LaJeunesse 2002 MarBiol Diversity and community structure of symbiotic dinoflagellates		8	1998	9	1999	No	spawner	hermaphrodite
16286	Pachyseris rugosa	ITS2	D1-4	53.1205	NA	Nikko Bay	Central Indo-Pacific	Tropical Northwestern Pacific	West Caroline Islands	5-10	5	10	7.5	134.617	Normal conditions	Original publication			DGGE of ITS2 & sequencing	Russel 2016 RemoteSensing Spectral Reflectance of Palauan Reef-Building Coral	<12-2008	NA	NA	NA	NA	No	spawner	gonochore
9133	Pachyseris speciosa	ITS2	D1-4	53.1205	NA	Ko Phi Phi Leh	Western Indo-Pacific	Andaman	Andaman Sea Coral Coast	6-12	6	12	7.7333	98.7667	Normal Cond	Geosymbio			DGGE of ITS2 & sequencing	LaJeunesse 2010 JBiogeograph Long-standing environmental conditions isolation and host–symbiont specificity	2007-02-01	2	2007	2	2007	no	spawner	gonochore
15500	Pavona cactus	ITS2	D1-4	53.1205	NA	Nosy Bé	Western Indo-Pacific	Western Indian Ocean	Western and Northern Madagascar		1	30	-13.4	48	Normal conditions	Original publication		collected at SCUBA depths	DGGE of ITS2 & sequencing	Boonstra 2011 Diss Latitudinal Patterns in the Distribution of Algal Symbionts		9	2001	9	2001	No	spawner	gonochore
2633	Pavona decussata	ITS2	D1-4	53.1205	NA	Ko Phi Phi Leh	Western Indo-Pacific	Andaman	Andaman Sea Coral Coast	6-12	6	12	7.7333	98.7667	Normal Cond	Geosymbio	same_as_AF499802		DGGE of ITS2 & sequencing	LaJeunesse 2010 JBiogeograph Long-standing environmental conditions isolation and host–symbiont specificity	2007-02-01	2	2007	2	2007	No	spawner	gonochore
9138	Pavona explanulata	ITS2	D1-4	53.1205	NA	Ko Phi Phi Don	Western Indo-Pacific	Andaman	Andaman Sea Coral Coast	2-6	2	6	7.7333	98.7667	Normal Cond	Geosymbio			DGGE of ITS2 & sequencing	LaJeunesse 2010 JBiogeograph Long-standing environmental conditions isolation and host–symbiont specificity	2007-02-01	2	2007	2	2007	No	spawner	gonochore
2646	Pavona varians	ITS2	D1-4	53.1205	NA	Similan Islands	Western Indo-Pacific	Andaman	Andaman Sea Coral Coast	2-12	2	12	8.6525	97.6408	Normal Cond	Geosymbio	same_as_AF499802		DGGE of ITS2 & sequencing	LaJeunesse 2010 JBiogeograph Long-standing environmental conditions isolation and host–symbiont specificity	2007-02-01	2	2007	2	2007	No	spawner	gonochore
16058	Pavona venosa	ITS2	D1-4	53.1205	NA	Vohemar	Western Indo-Pacific	Western Indian Ocean	Western and Northern Madagascar		1	30	-13.4	50	Normal conditions	Original publication		collected at SCUBA depths	DGGE of ITS2 & sequencing	Boonstra 2011 Diss Latitudinal Patterns in the Distribution of Algal Symbionts		9	2001	9	2001	No	spawner	gonochore
9152	Physogyra lichtensteini	ITS2	D1-4	53.1205	NA	Bawe	Western Indo-Pacific	Western Indian Ocean	East African Coral Coast	2-6	2	6	-6.15054	39.1315	Normal Cond	Geosymbio			DGGE of ITS2 & sequencing	LaJeunesse 2010 JBiogeograph Long-standing environmental conditions isolation and host–symbiont specificity	2007-04-01	4	2007	4	2007	No	spawner	gonochore
X111	Platygyra crosslandi	ITS2	D1-4	53.1205	NA	Nosy Bé	Western Indo-Pacific	Western Indian Ocean	Western and Northern Madagascar		1	30	-13.4	48	Normal conditions	Original publication		collected at SCUBA depths	DGGE of ITS2 & sequencing	Boonstra 2011 Diss Latitudinal Patterns in the Distribution of Algal Symbionts		9	2001	9	2001	No	spawner	hermaphrodite
15662	Platygyra daedalea	ITS2	D1-4	53.1205	NA	Nosy Bé	Western Indo-Pacific	Western Indian Ocean	Western and Northern Madagascar		1	30	-13.4	48	Normal conditions	Original publication		collected at SCUBA depths	DGGE of ITS2 & sequencing	Boonstra 2011 Diss Latitudinal Patterns in the Distribution of Algal Symbionts		3	2007	3	2007	No	spawner	hermaphrodite
9156	Platygyra pini	ITS2	D1-4	53.1205	NA	Cape Panwa	Western Indo-Pacific	Andaman	Andaman Sea Coral Coast	0-5	0	5	7.8073	98.4092	Normal Cond	Geosymbio			DGGE of ITS2 & sequencing	LaJeunesse 2010 JBiogeograph Long-standing environmental conditions isolation and host–symbiont specificity	2007-02-01	2	2007	2	2007	No	spawner	hermaphrodite
2666	Platygyra sinensis	ITS2	D1-4	53.1205	NA	Cape Panwa	Western Indo-Pacific	Andaman	Andaman Sea Coral Coast	0-5	0	5	7.8073	98.4092	Normal Cond	Geosymbio	same_as_AF499802		DGGE of ITS2 & sequencing	LaJeunesse 2010 JBiogeograph Long-standing environmental conditions isolation and host–symbiont specificity	2007-02-01	2	2007	2	2007	No	spawner	hermaphrodite
17751	Platygyra verweyi	ITS2	D1-4	53.1205	N/A	Wanlitung	Central Indo-Pecific	South Kuroshio	South Kuroshio	3	3	3	21.9639	120.712	Normal Conditions	Original Publication			DGGE of ITS2 & sequencing	Keshavmurthy 2012 MolEcol Symbiont communities and	02-07, 2009	2	2009	7	2009	No	spawner	hermaphrodite
9169	Plerogyra sinuosa	ITS2	D1-4	53.1205	NA	Ko Phi Phi Leh	Western Indo-Pacific	Andaman	Andaman Sea Coral Coast	6-12	6	12	7.7333	98.7667	Normal Cond	Geosymbio			DGGE of ITS2 & sequencing	LaJeunesse 2010 JBiogeograph Long-standing environmental conditions isolation and host–symbiont specificity	2007-02-01	2	2007	2	2007	No	spawner	gonochore
15976	Pocillopora damicornis	ITS2	D1-4	53.1205	NA	Tuléar	Western Indo-Pacific	Western Indian Ocean	Western and Northern Madagascar		1	30	-23.3	43.6	Normal conditions	Original publication		collected at SCUBA depths	DGGE of ITS2 & sequencing	Boonstra 2011 Diss Latitudinal Patterns in the Distribution of Algal Symbionts		11	2009	11	2009	Yes	brooder	hermaphrodite
5301	Pocillopora eydouxi	ITS2	D1-4	53.1205	3	Ofu Island, American Samoa	Eastern Indo-Pacific	Central Polynesia	Samoa Islands		1.25	1.5	-14.179	-169.655	Normal Cond	GeoSymbio	AF499802		DGGE of ITS2 & sequencing	Smith 2008 PacSci Environmental versus Genetic Influences on Growth Rates		9	2004	9	2004	Yes	spawner	hermaphrodite
16931	Pocillopora meandrina	ITS2	D1-4	53.1205	NA	Lisianski	Eastern Indo-Pacific	Hawaii	Hawaii	0-10'	0	10	26.0631	-174.04	Normal Conditions	Original pub			Cloning of ITS2 & sequencing	Stat 2015 CoralReefs Geographic structure and host specificity	2005-2009	NA	2005	NA	2009	Yes	spawner	hermaphrodite
9186	Podabacia crustacea	ITS2	D1-4	53.1205	NA	Cape Panwa	Western Indo-Pacific	Andaman	Andaman Sea Coral Coast	0-5	0	5	7.8073	98.4092	Normal Cond	Geosymbio			DGGE of ITS2 & sequencing	LaJeunesse 2010 JBiogeograph Long-standing environmental conditions isolation and host–symbiont specificity	2007-02-01	2	2007	2	2007	No	spawner	gonochore
16554	Porites harrisoni	ITS2	D1-4	53.1205	NA	Fujairah	Western Indo-Pacific	Red Sea and Gulf of Aden	Southern Red Sea	2-7'	2	7	25.5	56.27	Unknown	Original pub			DGGE of ITS2 & sequencing	D’Angelo 2015 ISME Local adaptation constrains the distribution potential	Sept 2012 and March 2013	9	2012	3	2013	NA	NA	NA
16438	Porites lobata	ITS2	D1-4	53.1205	NA	Musandam	Western Indo-Pacific	Red Sea and Gulf of Aden	Southern Red Sea	2-7'	2	7	26.1	56.25	Unknown	Original pub			DGGE of ITS2 & sequencing	D’Angelo 2015 ISME Local adaptation constrains the distribution potential	Sept 2012 and March 2013	9	2012	3	2013	Yes	spawner	gonochore
16550	Porites lutea	ITS2	D1-4	53.1205	NA	Fujairah	Western Indo-Pacific	Red Sea and Gulf of Aden	Southern Red Sea	2-7'	2	7	25.5	56.27	Unknown	Original pub			DGGE of ITS2 & sequencing	D’Angelo 2015 ISME Local adaptation constrains the distribution potential	Sept 2012 and March 2013	9	2012	3	2013	Yes	spawner	gonochore
2752	Psammocora contigua	ITS2	D1-4	53.1205	NA	Cape Panwa	Western Indo-Pacific	Andaman	Andaman Sea Coral Coast	0-5	0	5	7.8073	98.4092	Normal Cond	Geosymbio	same_as_AF499802		DGGE of ITS2 & sequencing	LaJeunesse 2010 JBiogeograph Long-standing environmental conditions isolation and host–symbiont specificity	2007-02-01	2	2007	2	2007	Yes	spawner	gonochore
9804	Sandalolitha robusta	ITS2	D1-4	53.1205	NA	Zamami Island, Japan	Central Indo-Pacific	South Kuroshio	South Kuroshio	1-10	1	10	26.2346	127.305	Normal Cond	Riddle 2011			DGGE of ITS2 & sequencing	LaJeunesse 2004 MEPS Closely related Symbiodinium spp differ in relative dominance	March (2002)	3	2002	3	2002	No	spawner	gonochore
15484	Seriatopora hystrix	ITS2	D1-4	53.1205	NA	NA	NA	NA	NA	NA	NA	NA	NA	NA	Normal Cond	Original pub		LaJeunesse 2011 PLoS1: D1a-f = D1a = D1-4; Held in capticivity at aquarium for up to 18 years	DGGE of ITS2 & sequencing	Smith 2009 JPhycol symbiodinium (dinophyta) diversity and stability in aquarium	<10-2008	NA	NA	NA	NA	Yes	brooder	hermaphrodite
9405	Siderastrea radians	ITS2	D1-4	53.1205	NA	Barbados	Tropical Atlantic	Tropical Northwestern Atlantic	Eastern Caribbean	>10	10	30	13.07	-60	Normal Cond	Original pub			DGGE of ITS2 & sequencing	Finney 2010 MicrobEcol The Relative Significance of Host–Habitat	Jul 02 -Aug 03	7	2002	8	2003	yes	brooder	gonochore
2887	Siderastrea siderea	ITS2	D1-4	53.1205	NA	Barbados, Caribbean	Tropical Atlantic	Tropical Northwestern Atlantic	Eastern Caribbean		15	15	13.192	-59.641	Normal Cond	Geosymbio			DGGE of ITS2 & sequencing	LaJeunesse 2009 ProcRSocB Outbreak and persistence of opportunistic Zoox during 2005 Caribbean bleaching		7	2005	8	2005	No	spawner	gonochore
15992	Stylophora pistillata	ITS2	D1-4	53.1205	NA	Tuléar	Western Indo-Pacific	Western Indian Ocean	Western and Northern Madagascar		1	30	-23.3	43.6	Normal conditions	Original publication		collected at SCUBA depths	DGGE of ITS2 & sequencing	Boonstra 2011 Diss Latitudinal Patterns in the Distribution of Algal Symbionts		11	2009	11	2009	Yes	brooder	hermaphrodite
9202	Symphyllia radians	ITS2	D1-4	53.1205	NA	Cape Panwa	Western Indo-Pacific	Andaman	Andaman Sea Coral Coast	0-5	0	5	7.8073	98.4092	Normal Cond	Geosymbio			DGGE of ITS2 & sequencing	LaJeunesse 2010 JBiogeograph Long-standing environmental conditions isolation and host–symbiont specificity	2007-02-01	2	2007	2	2007	No	spawner	hermaphrodite
5249	Seriatopora caliendrum	ITS2	C123	55.3156	NA	Ningaloo	Centra Indo-Pacific	Northwest Australian Shelf	Ningaloo	<7	0	7	-22.867	113.746	Normal Cond		EU099826		DGGE of ITS2 & sequencing	Silverstein 2011 MEPS Novel algal symbiont diversity in reef corals of Western Australia	2005-06-01	6	2005	6	2005	Yes	brooder	hermaphrodite
5151	Turbinaria mesenterina	ITS2	C130	55.3156	NA	Ningaloo	Centra Indo-Pacific	Northwest Australian Shelf	Ningaloo	<7	0	7	-22.867	113.746	Normal Cond		HQ385807		DGGE of ITS2 & sequencing	Silverstein 2011 MEPS Novel algal symbiont diversity in reef corals of Western Australia	2005-06-01	6	2005	6	2005	No	spawner	gonochore
5528	Pavona varians	ITS2	C1h	55.3156	NA	Johnston Atoll, Hawaii	Eastern Indo-Pacific	Hawaii	Hawaii	3-7 m	3	7	18.078	-169.533	Normal Cond	GenBank	AY258473		Cloning of ITS2 & sequencing	Stat 2009 MEPS Specificity in communities of Symbiodinium in corals from Johnston Atoll	June '06	6	2006	6	2006	No	spawner	gonochore
5199	Pocillopora damicornis	ITS2	C1h	55.3156	NA	Ningaloo	Centra Indo-Pacific	Northwest Australian Shelf	Ningaloo	<7	0	7	-22.867	113.746	Normal Cond				DGGE of ITS2 & sequencing	Silverstein 2011 MEPS Novel algal symbiont diversity in reef corals of Western Australia	2005-06-01	6	2005	6	2005	Yes	brooder	hermaphrodite
8454	Pocillopora elegans	ITS2	C1h	55.3156	NA	Tanga	Western Indo-Pacific	Western Indian Ocean	East African Coral Coast		1	7	-5.15382	39.115	Normal Cond	Direct from publication			DGGE of ITS2 & sequencing	Chauka 2012 WIndOceaJMarSci Diversity of Symbiodinium in Tanzania		8	2008	8	2008	Yes	spawner	hermaphrodite
8458	Pocillopora eydouxi	ITS2	C1h	55.3156	NA	Tanga	Western Indo-Pacific	Western Indian Ocean	East African Coral Coast		1	7	-5.15382	39.115	Normal Cond	Direct from publication			DGGE of ITS2 & sequencing	Chauka 2012 WIndOceaJMarSci Diversity of Symbiodinium in Tanzania		8	2008	8	2008	Yes	spawner	hermaphrodite
9181	Pocillopora verrucosa	ITS2	C1h	55.3156	NA	Changuu	Western Indo-Pacific	Western Indian Ocean	East African Coral Coast	2-6	2	6	-6.12007	39.1681	Normal Cond	Geosymbio			DGGE of ITS2 & sequencing	LaJeunesse 2010 JBiogeograph Long-standing environmental conditions isolation and host–symbiont specificity	2007-04-01	4	2007	4	2007	Yes	spawner	hermaphrodite
X112	Montipora stellata	ITS2	C26	63.2178	NA	Heron Island, GBR	Central Indo-Pacific	Northeast Australian Shelf	Central and Southern GBR	3	3	3	-23	152	Normal Cond	Original pub			DGGE of ITS2 & sequencing	LaJeunesse 2003 LimnolOceanogr Low symbiont diversity in southern Great Barrier Reef	Feb-Mar 2002	2	2002	3	2002	Yes	spawner	hermaphrodite
X113	Montipora capitata	ITS2	C26	63.2178	NA	Oahu	Eastern Indo-Pacific	Hawaii	Hawaii	1-5	1	5	21.4667	-157.983	Normal Cond	Original pub			DGGE of ITS2 & sequencing	LaJeunesse 2004 CoralReefs High diversity and host specificity observed among symbiotic	<10-2003	NA	NA	NA	NA	Yes	spawner	hermaphrodite
14069	Acropora latistella	ITS2	C40	55.3156	NA	Dampier	Centra Indo-Pacific	Northwest Australian Shelf	Exmouth to Broome	<7	0	7	-20.6595	116.708	Moderate bleaching				DGGE of ITS2 & sequencing	Silverstein 2011 MEPS Novel algal symbiont diversity in reef corals of Western Australia	2005-06-01	6	2005	6	2005	No	spawner	hermaphrodite
5248	Cyphastrea chalcidicum	ITS2	C40	55.3156	NA	Ningaloo	Centra Indo-Pacific	Northwest Australian Shelf	Ningaloo	<7	0	7	-22.867	113.746	Normal Cond		same_as_AY258485		DGGE of ITS2 & sequencing	Silverstein 2011 MEPS Novel algal symbiont diversity in reef corals of Western Australia	2005-06-01	6	2005	6	2005	No	spawner	hermaphrodite
16270	Cyphastrea serailia	ITS2	C40	55.3156	NA	Rebotel Reef	Central Indo-Pacific	Tropical Northwestern Pacific	West Caroline Islands	5-15	5	15	7.5	134.617	Normal conditions	Original publication			DGGE of ITS2 & sequencing	Russel 2016 RemoteSensing Spectral Reflectance of Palauan Reef-Building Coral	<12-2008	NA	NA	NA	NA	No	spawner	hermaphrodite
X114	Echinopora hirsutissima	ITS2	C40	55.3156	NA	Feather Reef GBR	Central Indo-Pacific	Northeast Australian Shelf	Central and Southern Great Barrier Reef	1-8	1	8	-18	146	Normal Cond	Original publication			DGGE of ITS2 & sequencing	LaJeunesse 2004 MEPS Closely related Symbiodinium spp differ in relative dominance	May (2003)	5	2003	5	2003	No	spawner	hermaphrodite
14083	Echinopora lamellosa	ITS2	C40	55.3156	NA	Ningaloo	Centra Indo-Pacific	Northwest Australian Shelf	Ningaloo	<7	0	7	-22.867	113.746	Normal Cond				DGGE of ITS2 & sequencing	Silverstein 2011 MEPS Novel algal symbiont diversity in reef corals of Western Australia	2005-06-01	6	2005	6	2005	No	spawner	hermaphrodite
5154	Galaxea fascicularis	ITS2	C40	55.3156	NA	Ningaloo	Centra Indo-Pacific	Northwest Australian Shelf	Ningaloo	<7	0	7	-22.867	113.746	Normal Cond		same_as_AY258485		DGGE of ITS2 & sequencing	Silverstein 2011 MEPS Novel algal symbiont diversity in reef corals of Western Australia	2005-06-01	6	2005	6	2005	No	spawner	gonochore
5233	Hydnophora rigida	ITS2	C40	55.3156	NA	Ningaloo	Centra Indo-Pacific	Northwest Australian Shelf	Ningaloo	<7	0	7	-22.867	113.746	Normal Cond		same_as_AY258485		DGGE of ITS2 & sequencing	Silverstein 2011 MEPS Novel algal symbiont diversity in reef corals of Western Australia	2005-06-01	6	2005	6	2005	No	spawner	hermaphrodite
7693	Isopora palifera	ITS2	C40	55.3156	NA	Chagos Archipelago	Western Indo-Pacific	Central Indian Ocean Islands	Chagos	2-7m	2	7	-6	72	Normal Cond	Direct from Publication		Listed as Isopera palifera	DGGE of ITS2 & sequencing	Yang 2012 PLoSOne Diversity and Distribution of Symbiodinium Associated		3	2006	3	2006	No	brooder	hermaphrodite
5218	Lobophyllia hemprichii	ITS2	C40	55.3156	NA	Ningaloo	Centra Indo-Pacific	Northwest Australian Shelf	Ningaloo	<7	0	7	-22.867	113.746	Normal Cond				DGGE of ITS2 & sequencing	Silverstein 2011 MEPS Novel algal symbiont diversity in reef corals of Western Australia	2005-06-01	6	2005	6	2005	No	spawner	hermaphrodite
3029	Mycedium elephantotus	ITS2	C40	55.3156	NA	Curaçao Island	Central Indo-Pacific	Northeast Australian Shelf	Central and Southern Great Barrier Reef	1-6	1	6	-18.67	146.549	Normal Cond	Aquarist			DGGE of ITS2 & sequencing	LaJeunesse 2004 MEPS Closely related Symbiodinium spp differ in relative dominance	May (2003)	5	2003	5	2003	No	spawner	hermaphrodite
16271	Pachyseris rugosa	ITS2	C40	55.3156	NA	Rebotel Reef	Central Indo-Pacific	Tropical Northwestern Pacific	West Caroline Islands	5-15	5	15	7.5	134.617	Normal conditions	Original publication			DGGE of ITS2 & sequencing	Russel 2016 RemoteSensing Spectral Reflectance of Palauan Reef-Building Coral	<12-2008	NA	NA	NA	NA	No	spawner	gonochore
9809	Symphyllia radians	ITS2	C40	55.3156	NA	Feather Reef GBR	Central Indo-Pacific	Northeast Australian Shelf	Central and Southern Great Barrier Reef	1-8'	1	8	-18	146	Normal Cond	Riddle 2011			DGGE of ITS2 & sequencing	LaJeunesse 2004 MEPS Closely related Symbiodinium spp differ in relative dominance	May (2003)	5	2003	5	2003	No	spawner	hermaphrodite
3065	Symphyllia recta	ITS2	C40	55.3156	NA	Feather Reef GBR	Central Indo-Pacific	Northeast Australian Shelf	Central and Southern Great Barrier Reef	10-17'	10	17	-18	146	Normal Cond	SymbioGBR	AY258485		DGGE of ITS2 & sequencing	LaJeunesse 2004 MEPS Closely related Symbiodinium spp differ in relative dominance	May (2003)	5	2003	5	2003	No	spawner	hermaphrodite
X115	Turbinaria frondens	ITS2	C40	55.3156	NA	Feather Reef GBR	Central Indo-Pacific	Northeast Australian Shelf	Central and Southern Great Barrier Reef	10-17'	10	17	-18	146	Normal Cond	Original publication			DGGE of ITS2 & sequencing	LaJeunesse 2004 MEPS Closely related Symbiodinium spp differ in relative dominance	May (2003)	5	2003	5	2003	No	spawner	gonochore
X116	Turbinaria reniformis	ITS2	C40	55.3156	NA	Rib Reef GBR	Central Indo-Pacific	Northeast Australian Shelf	Central and Southern Great Barrier Reef	1-8	1	8	-18.4781	146.871	Normal Cond	Original publication			DGGE of ITS2 & sequencing	LaJeunesse 2004 MEPS Closely related Symbiodinium spp differ in relative dominance	May (2003)	5	2003	5	2003	No	spawner	gonochore
X117	Turbinaria stellulata	ITS2	C40	55.3156	NA	Rib Reef GBR	Central Indo-Pacific	Northeast Australian Shelf	Central and Southern Great Barrier Reef	1-8	1	8	-18.4781	146.871	Normal Cond	Original publication			DGGE of ITS2 & sequencing	LaJeunesse 2004 MEPS Closely related Symbiodinium spp differ in relative dominance	May (2003)	5	2003	5	2003	No	spawner	gonochore
5152	Turbinaria mesenterina	ITS2	C3jj	63.2178	NA	Ningaloo	Centra Indo-Pacific	Northwest Australian Shelf	Ningaloo	<7	0	7	-22.867	113.746	Normal Cond		HQ385809		DGGE of ITS2 & sequencing	Silverstein 2011 MEPS Novel algal symbiont diversity in reef corals of Western Australia	2005-06-01	6	2005	6	2005	No	spawner	gonochore
X118	Meandrina meandrites	ITS2	F2	70.8274		Jamaica	Tropical Atlantic	Tropical Northwestern Atlantic	Greater Antilles	NA	NA	NA	NA	NA	Normal Cond	Original publication			NA	LaJeunesse 2001 JPhycol Investigating the biodiversity	NA	NA	NA	NA	NA	No	spawner	Mixed
2531	Favites halicora	ITS2	C116	71.12	NA	Banda Kuu	Western Indo-Pacific	Western Indian Ocean	East African Coral Coast	3-12	3	12	-5.73012	39.3035	Normal Cond	Geosymbio	GU111899		DGGE of ITS2 & sequencing	LaJeunesse 2010 JBiogeograph Long-standing environmental conditions isolation and host–symbiont specificity	2007-04-01	4	2007	4	2007	no	spawner	hermaphrodite
5042	Stylophora pistillata	ITS2	C8a	71.12	NA	Heron Island, GBR	Central Indo-Pacific	Northeast Australian Shelf	Central and Southern GBR		15	18	-23.44	151.91	Normal	GenBank	EU808004		DGGE of ITS2 & sequencing	Sampayo 2008 PNAS Bleaching susceptibility and mortality of corals are determined by fine-scale differences in symbiont type		3	2005	3	2005	Yes	brooder	hermaphrodite
X119	Montipora	ITS2	C26bb	71.12	NA	Lizard Island, GBR	Central Indo-Pacific	Northeast Australian Shelf	Torres Strait Northern Great Barrier Reef	3-6	3	6	-14.6166	145.636	Normal Conditions	Original publication			DGGE of ITS2 & sequencing	Tonk 2014 JPhycol Symbiodinium diversity in reef invertebrates		10	2007	9	2008	Yes	spawner	hermaphrodite
Phylogenetic analysis of symbiont transmission mechanisms reveal evolutionary patterns in thermotolerance and host specificity that enhance bleaching resistance among vertically transmitted Symbiodinium
Timothy D. Swain, Mark W. Westneat, Vadim Backman, Luisa A. Marcelino
